# Supplementary material
Source: PubMed Central journal article supplement (PMC4377295)

**A** Figure S4 *GMRhid; Ey>Flp*

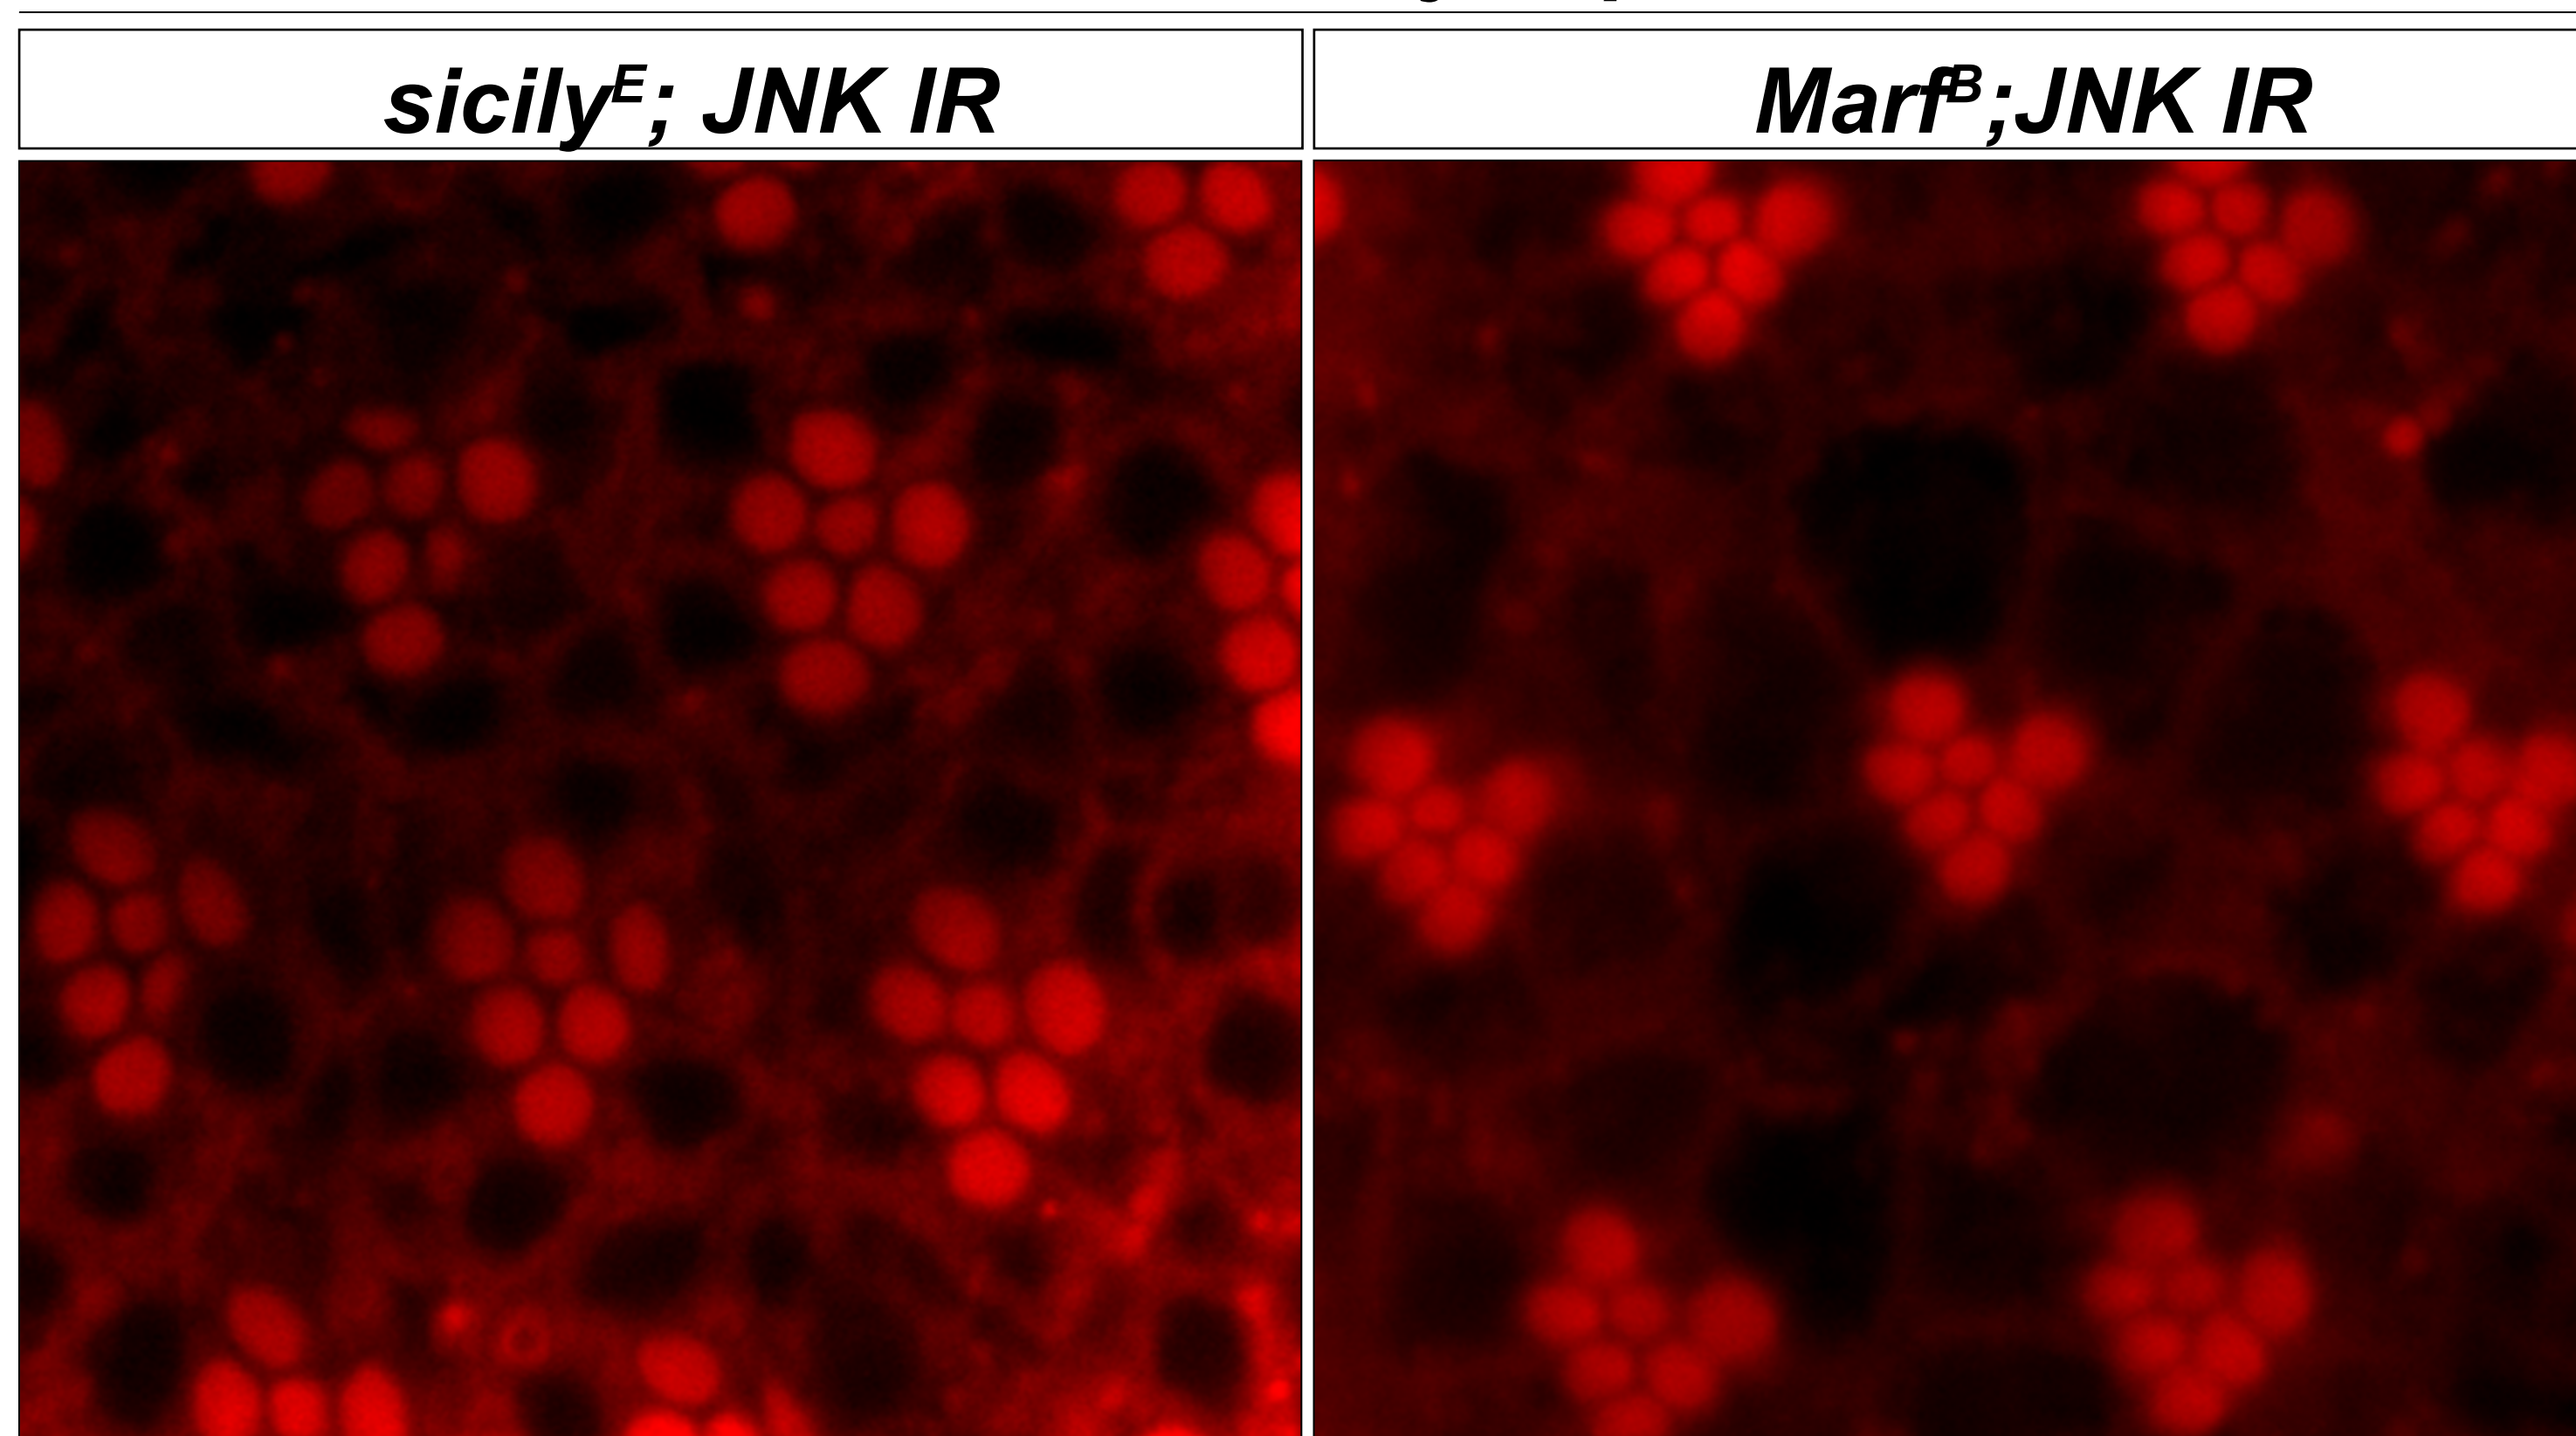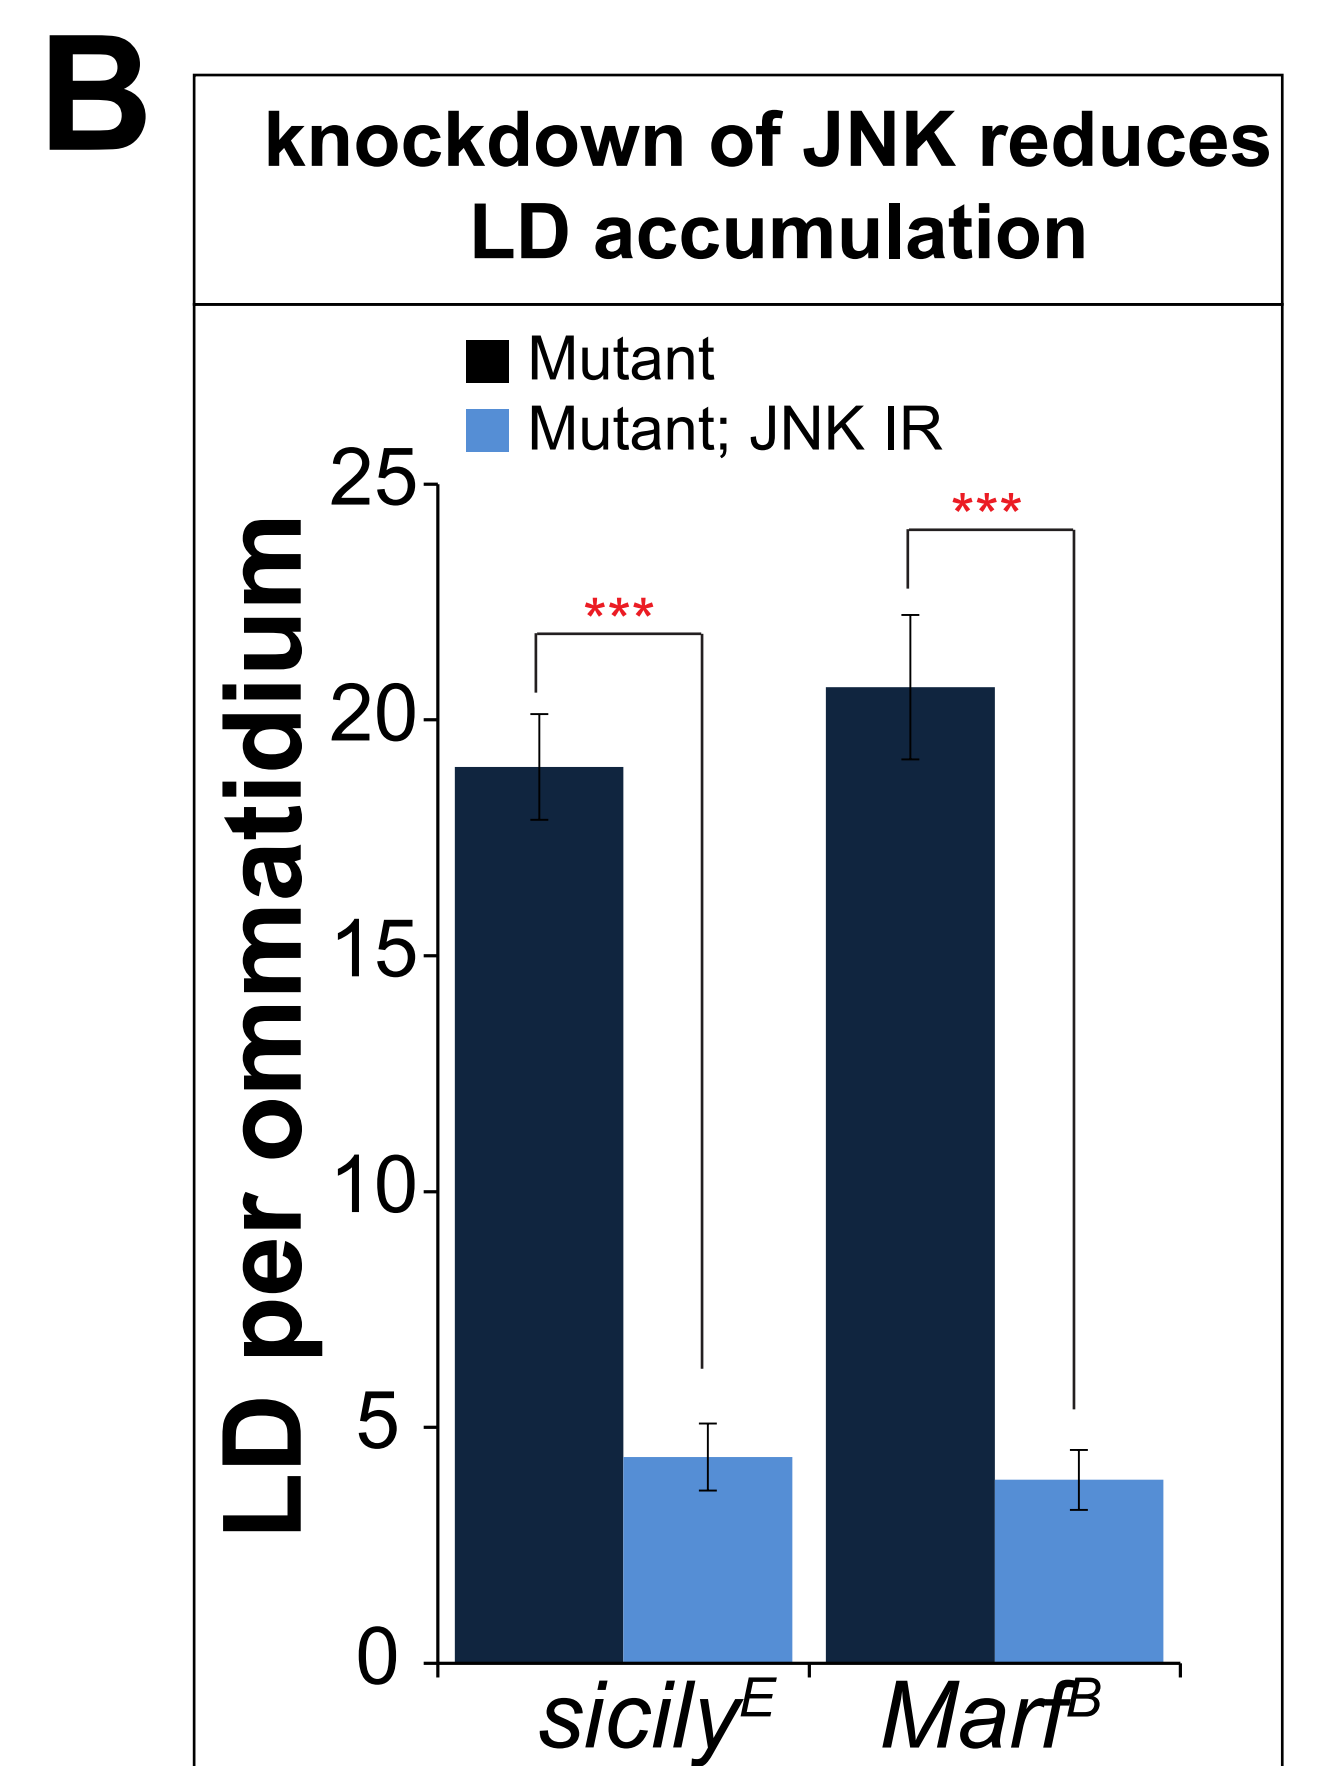

**C** JNK and SREBP are elevated in mutant larvae

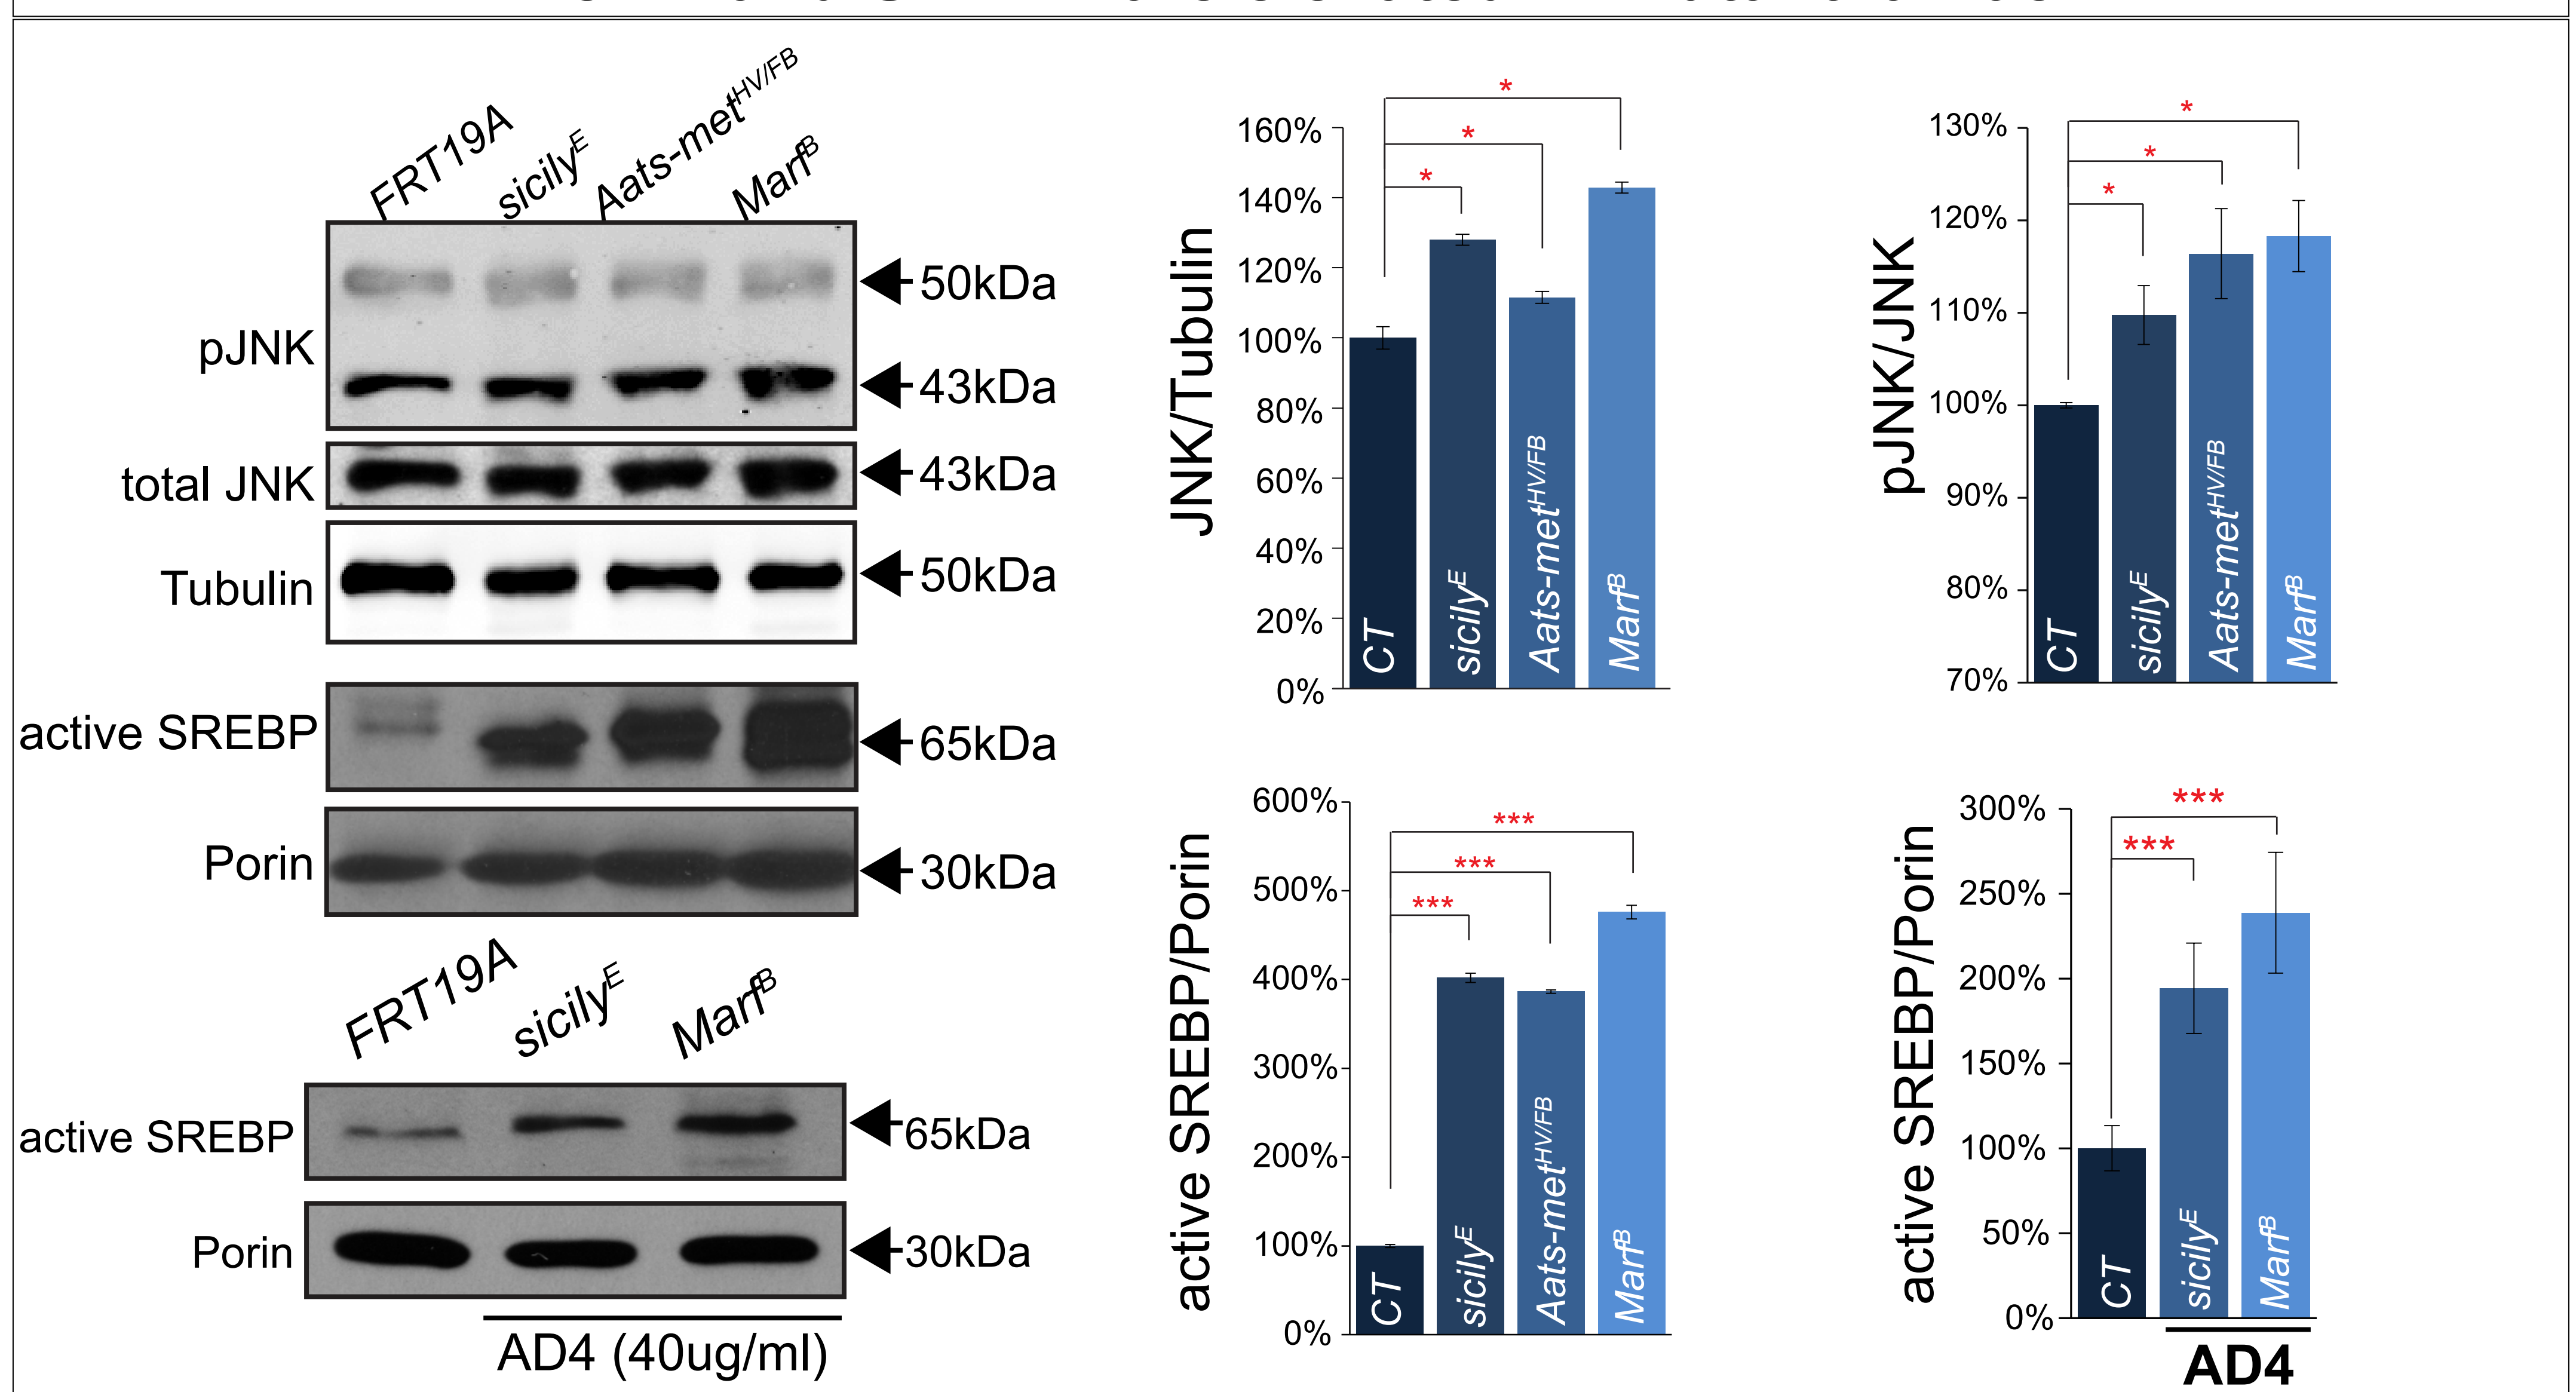

**D** Mutant without LD accumulation do not have dramatic increase in active SREBP

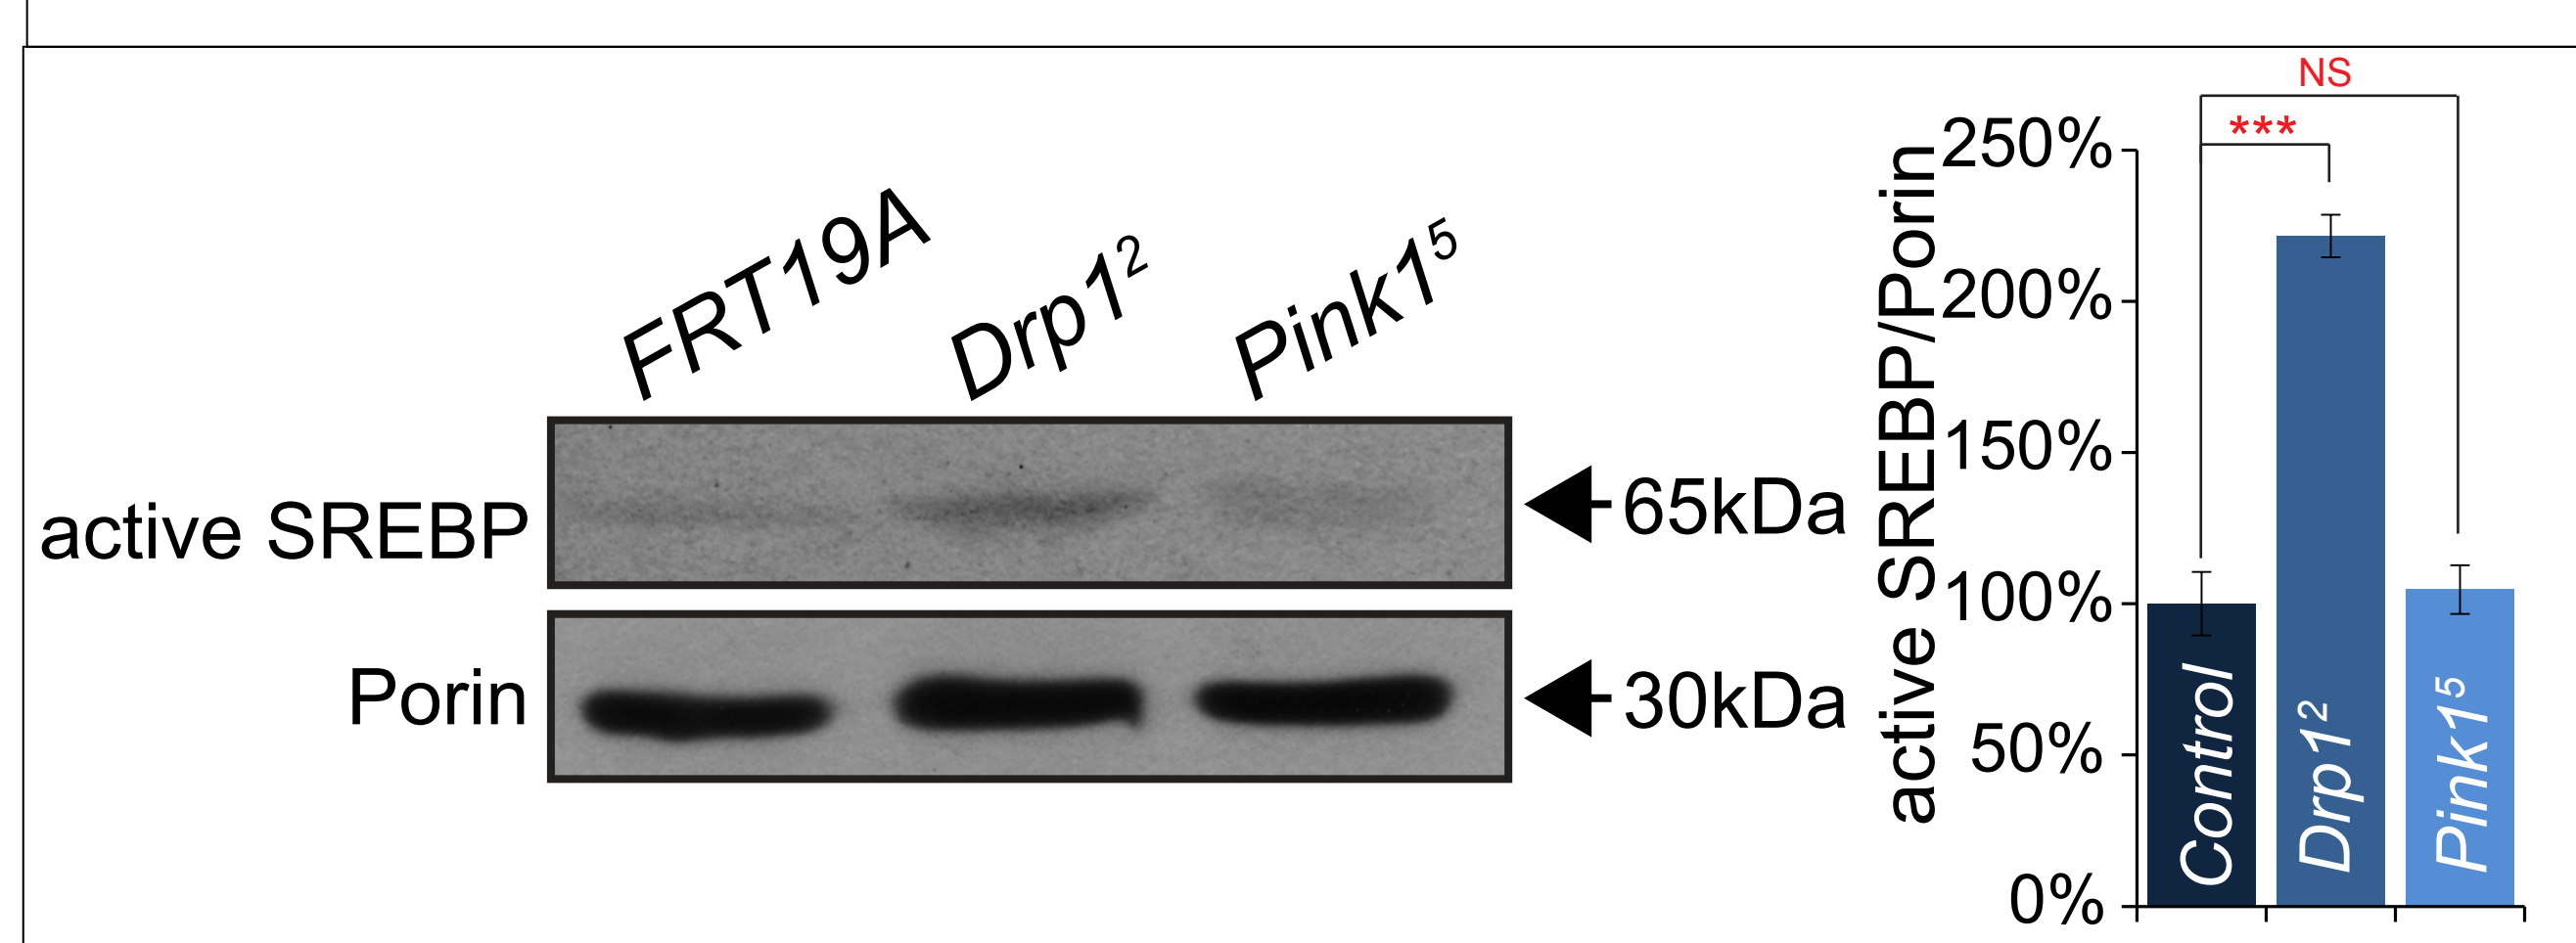

**E** Expression of hSOD1 reduces levels of JNK and active SREBP in mutant larvae

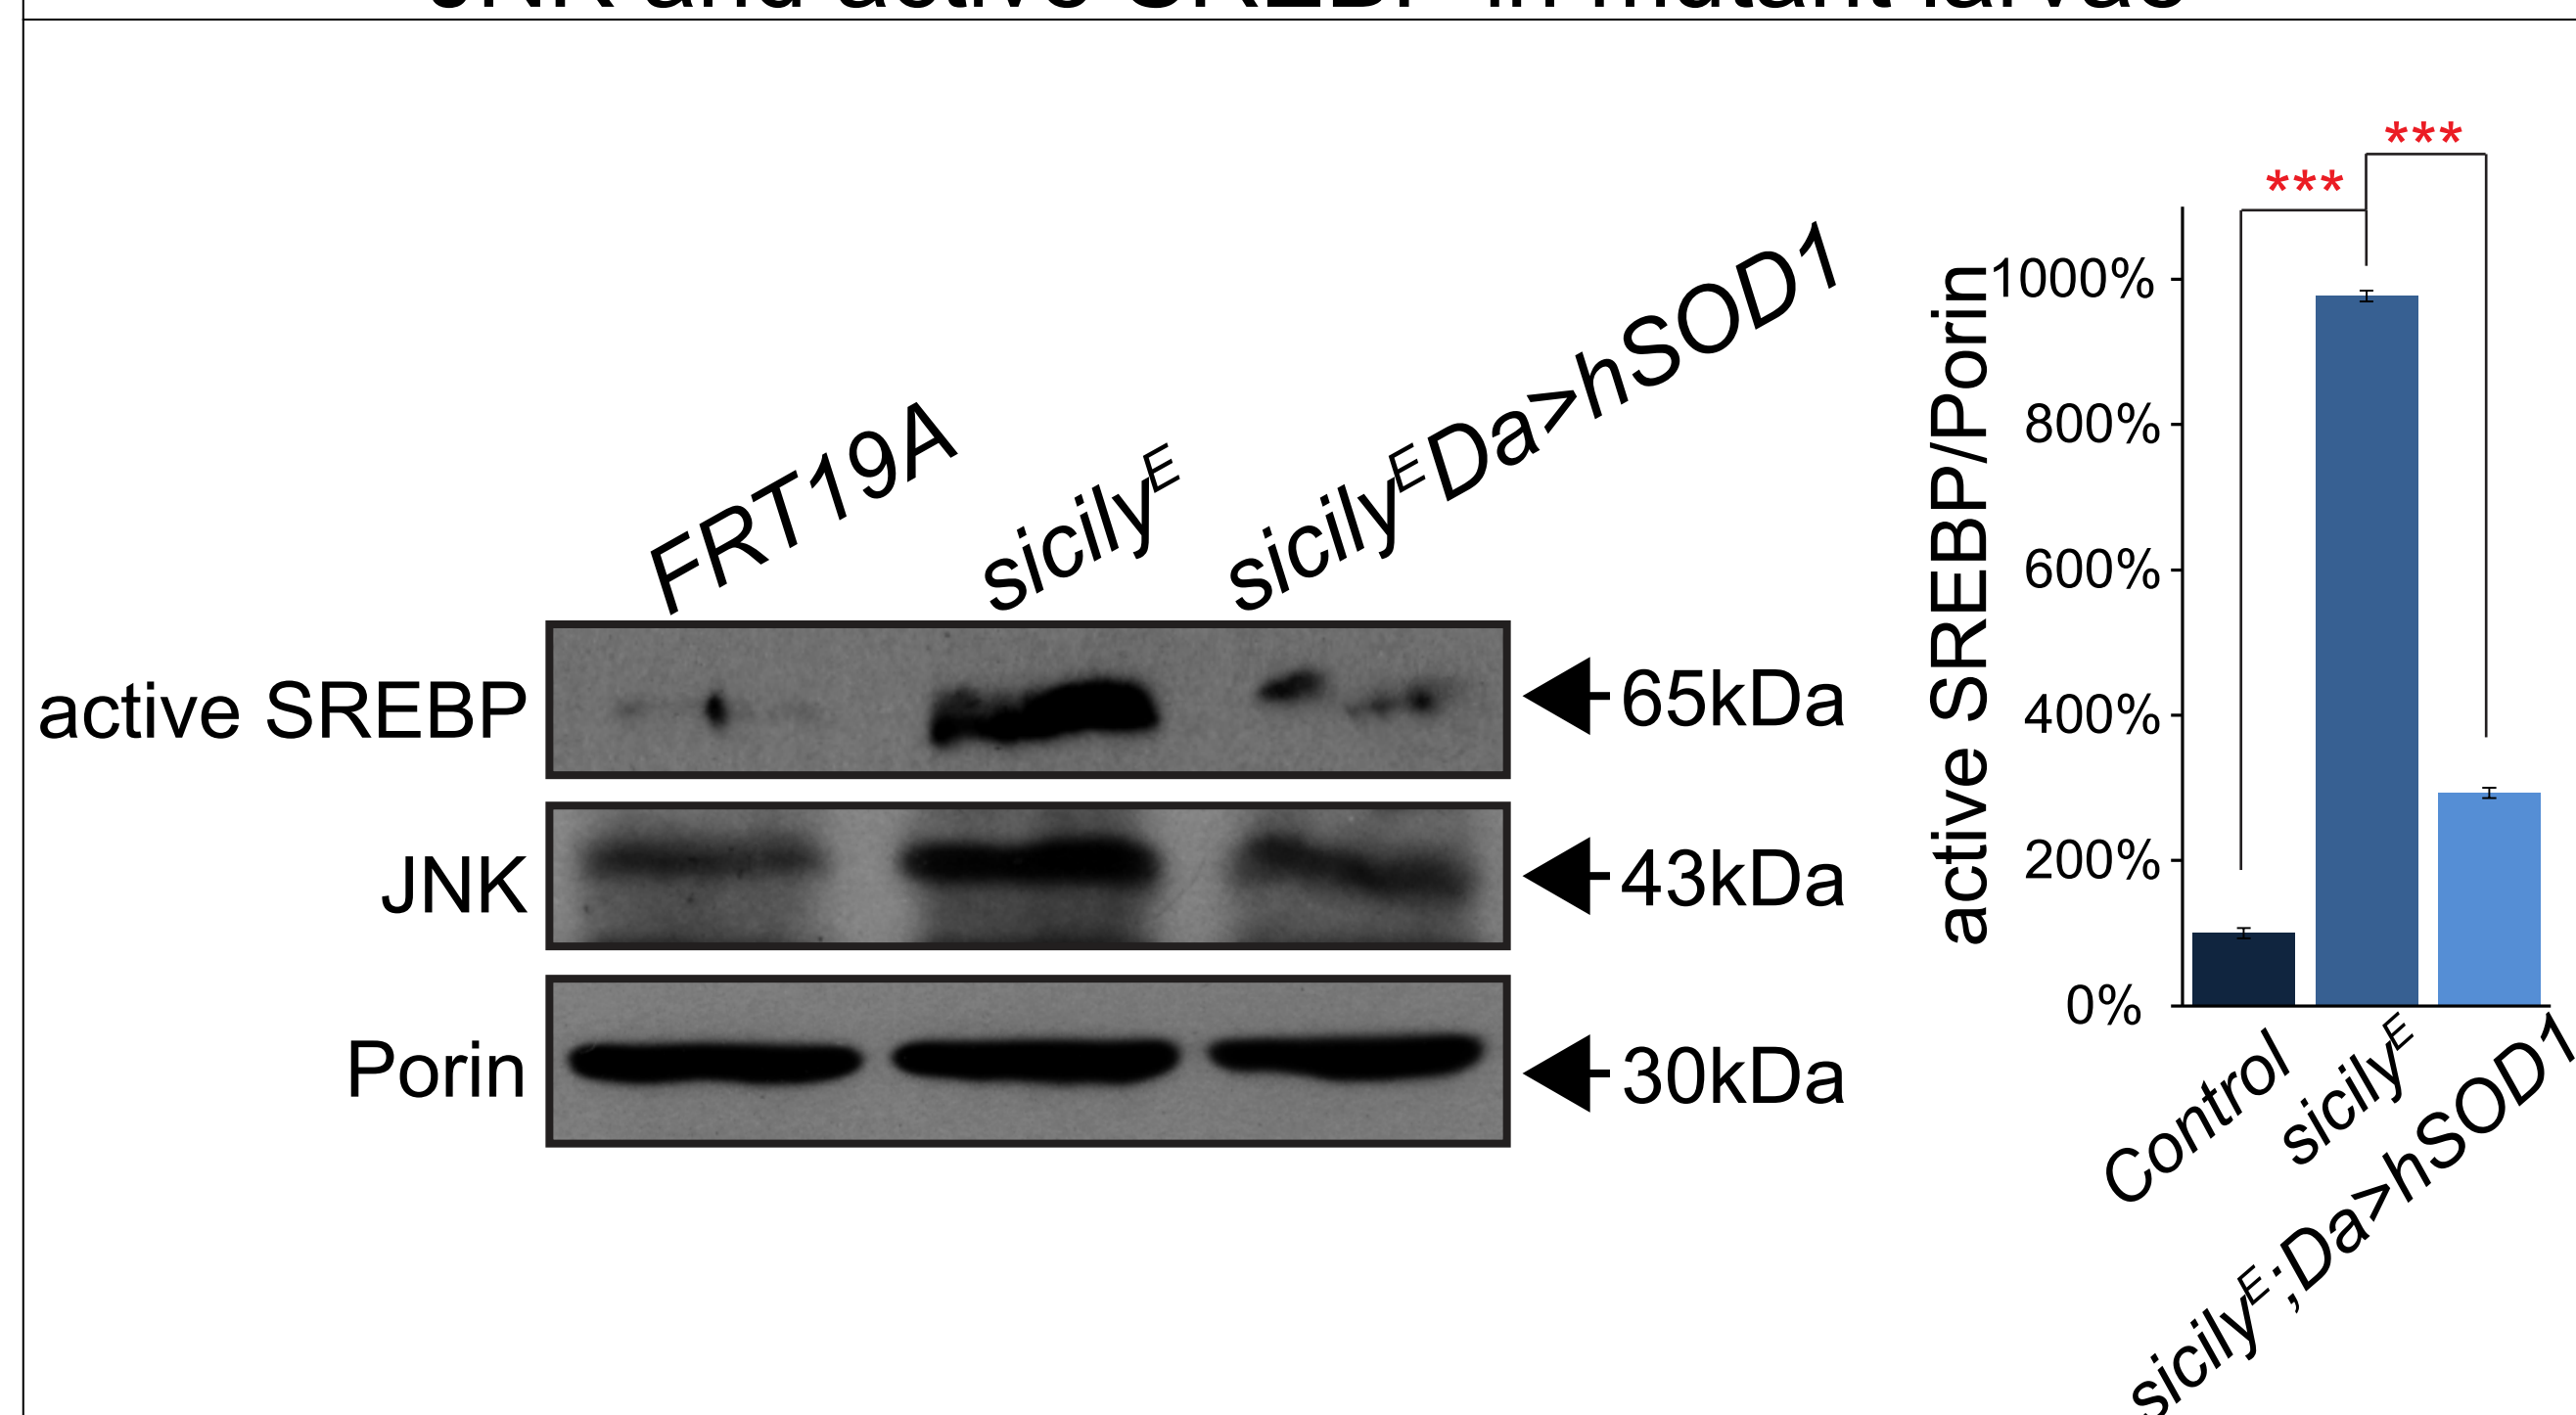

Supplement: NIHMS649341-supplement-4.pdf [file NIHMS649341-supplement-4.pdf]
