# Supplementary material
Source: PubMed Central journal article supplement (PMC4377295)

**Figure S1**

Lamina

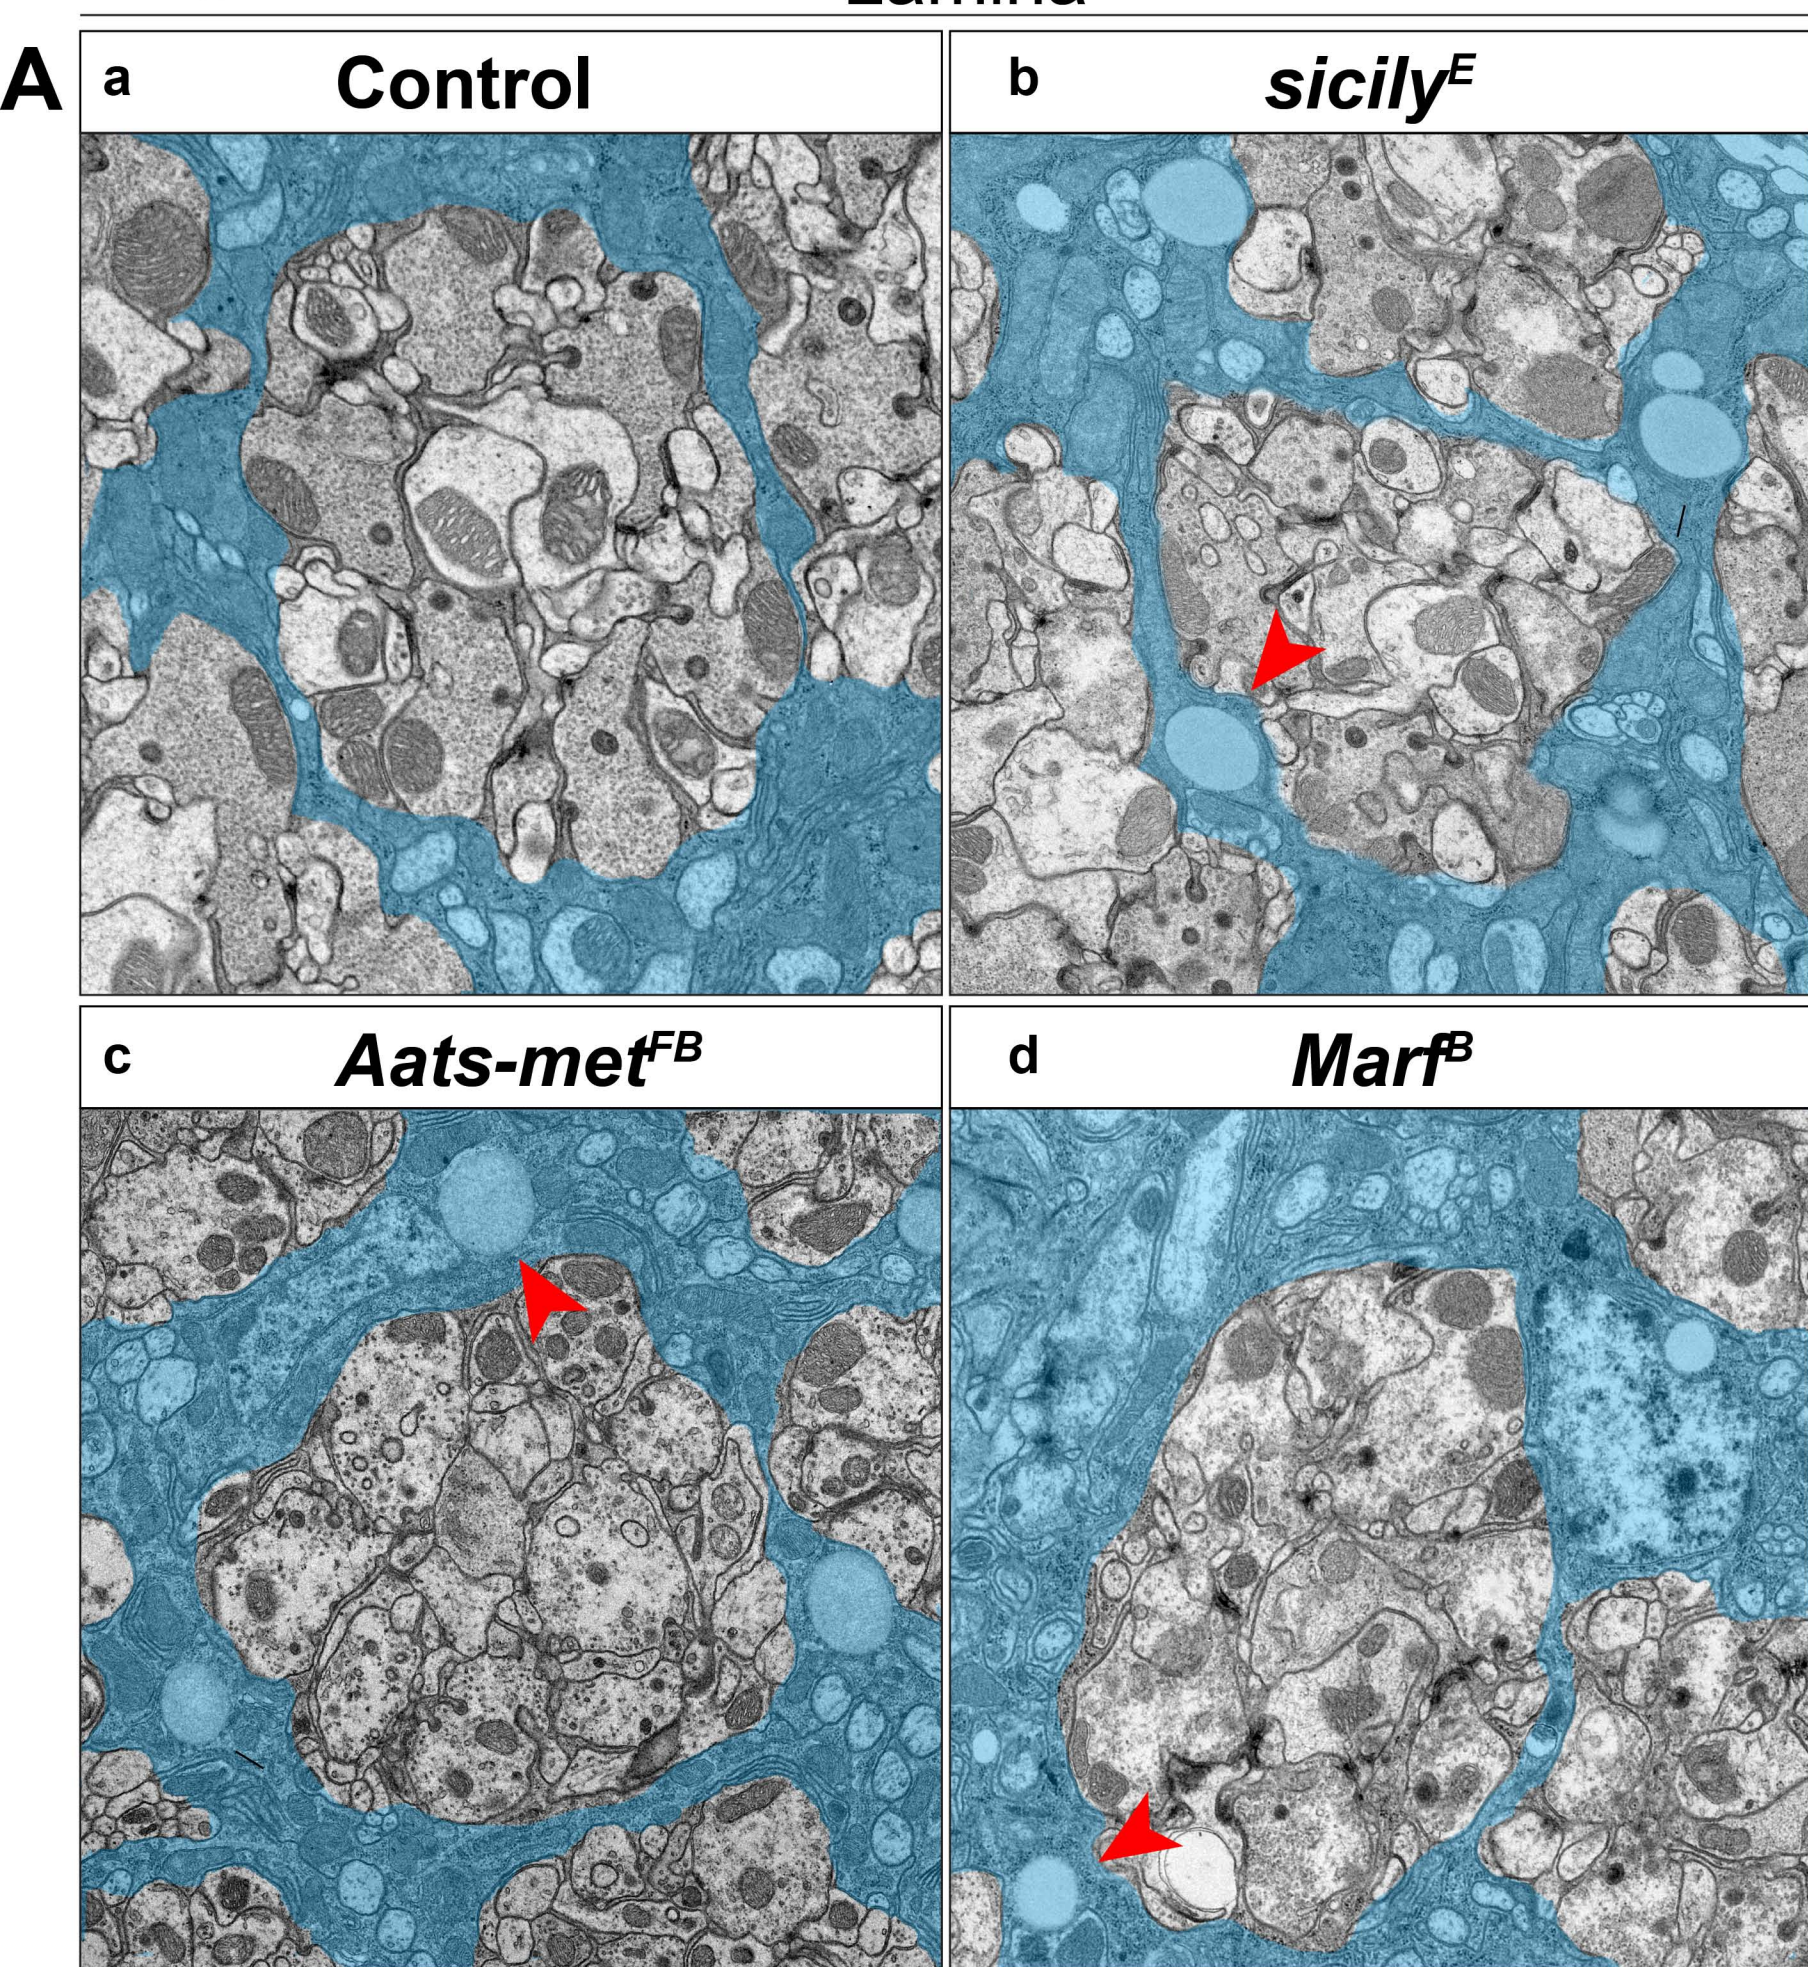

**B**

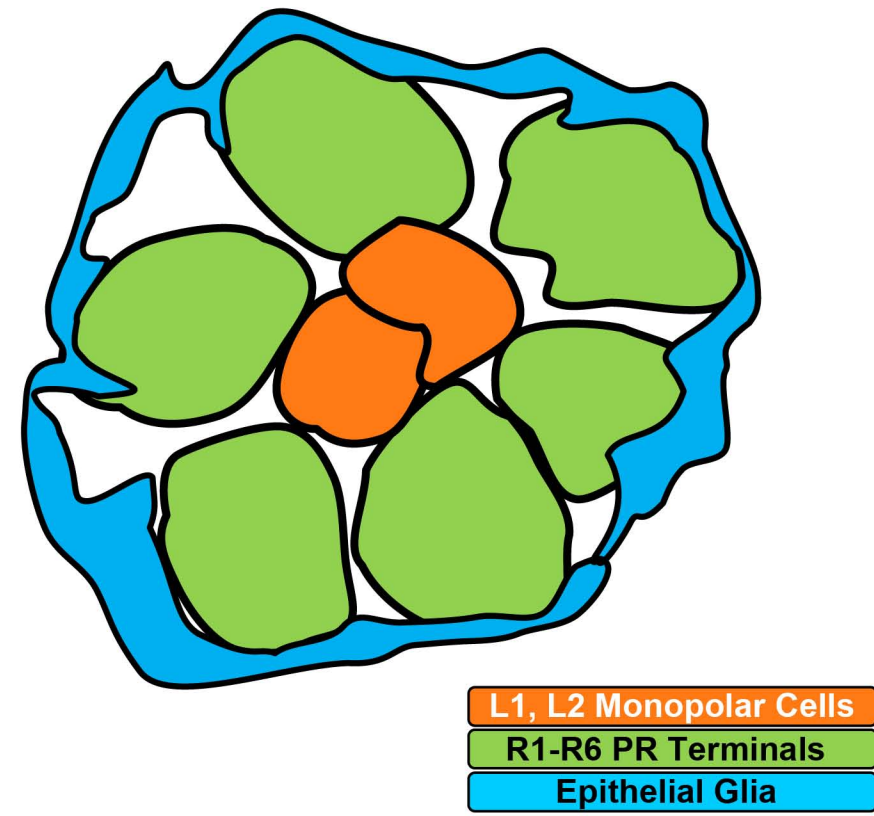

**C**

**Lamina LD accumulation**

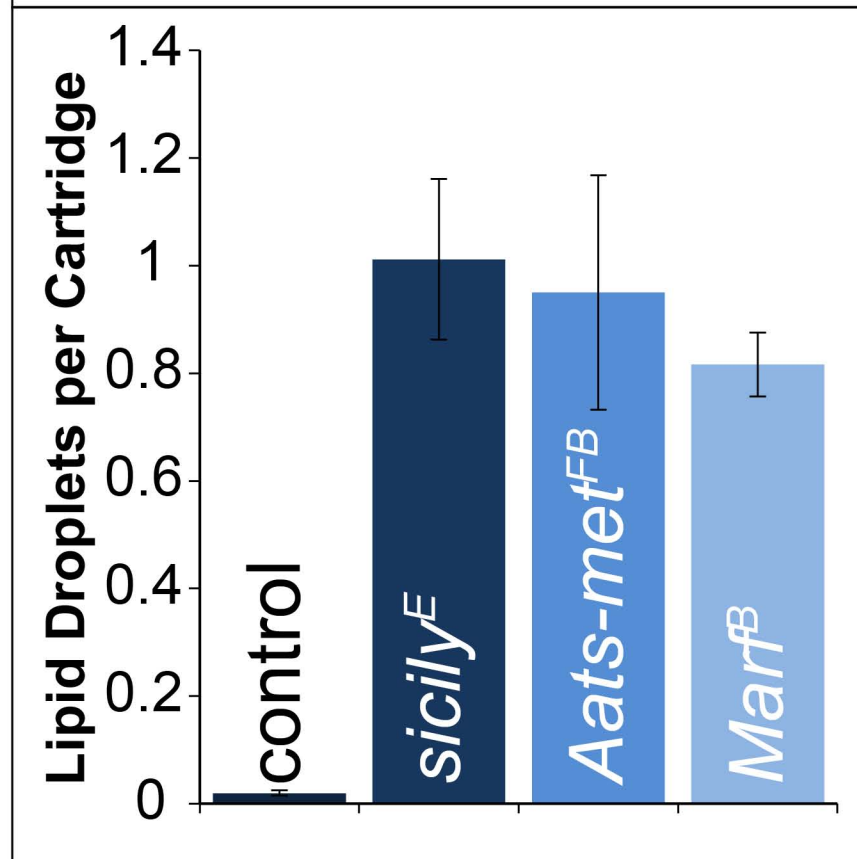

Retina

**D**

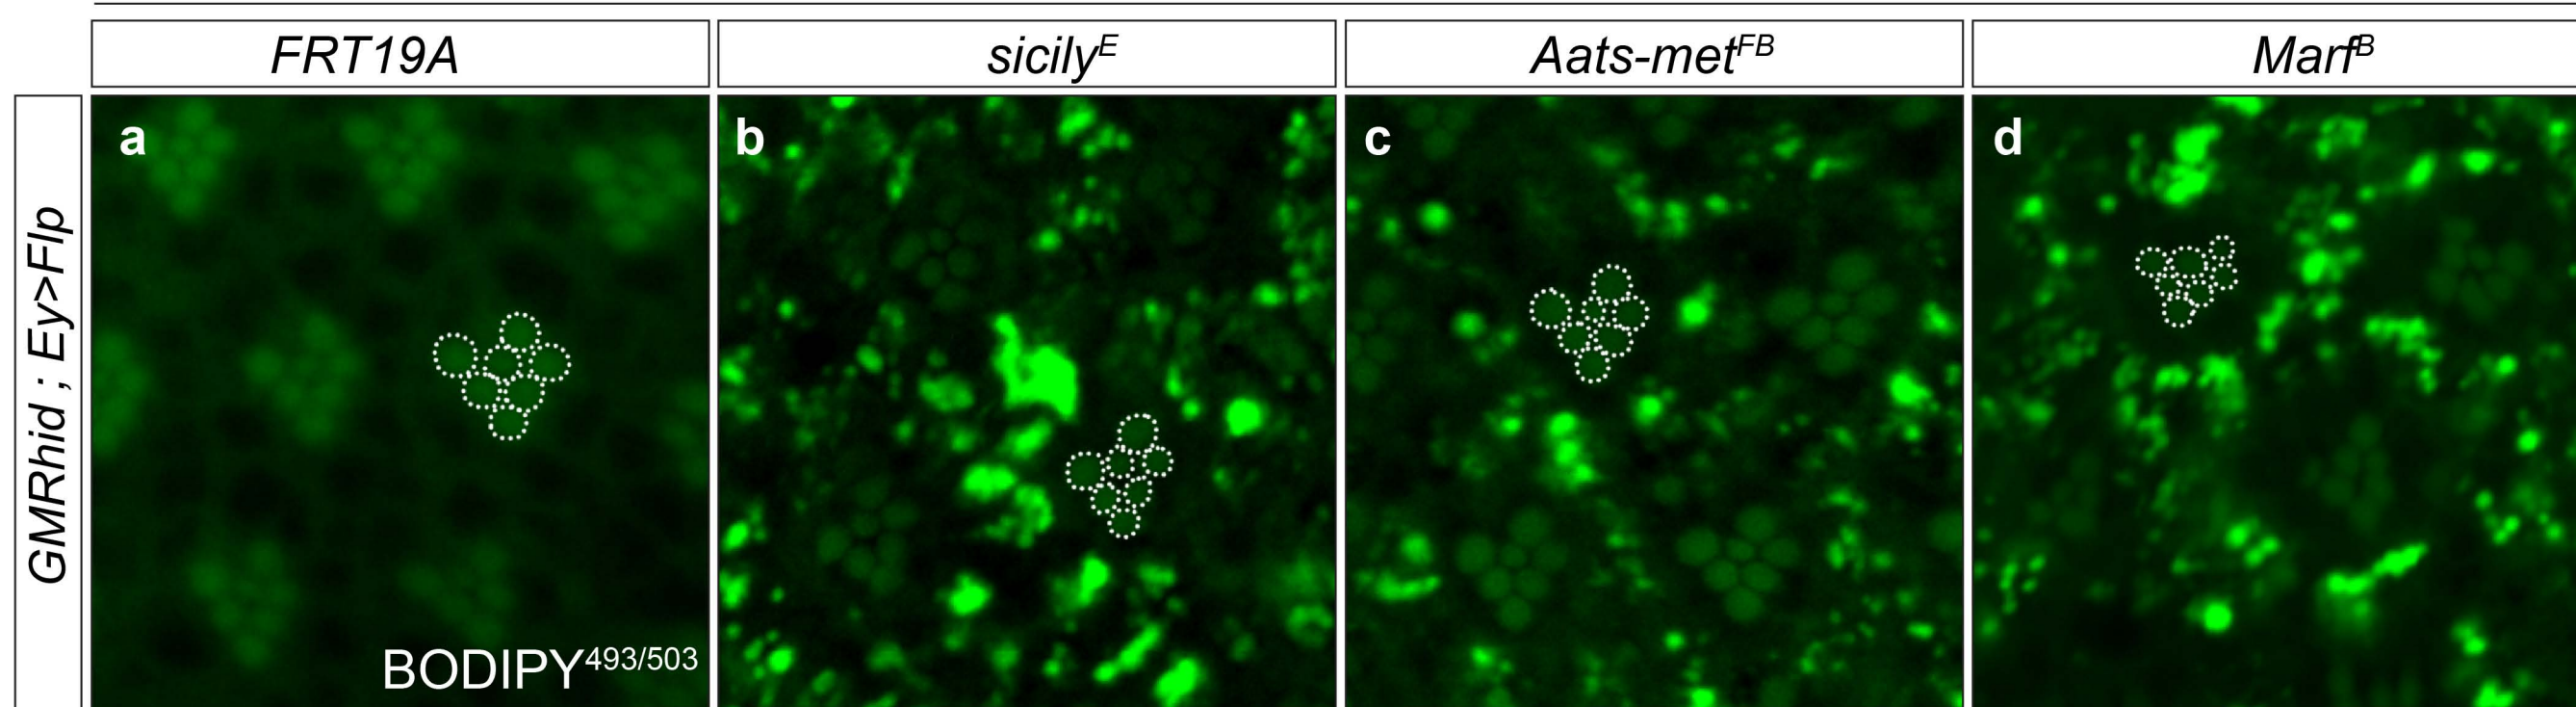

**E**

*GMR hid*; *Ey>Flp*

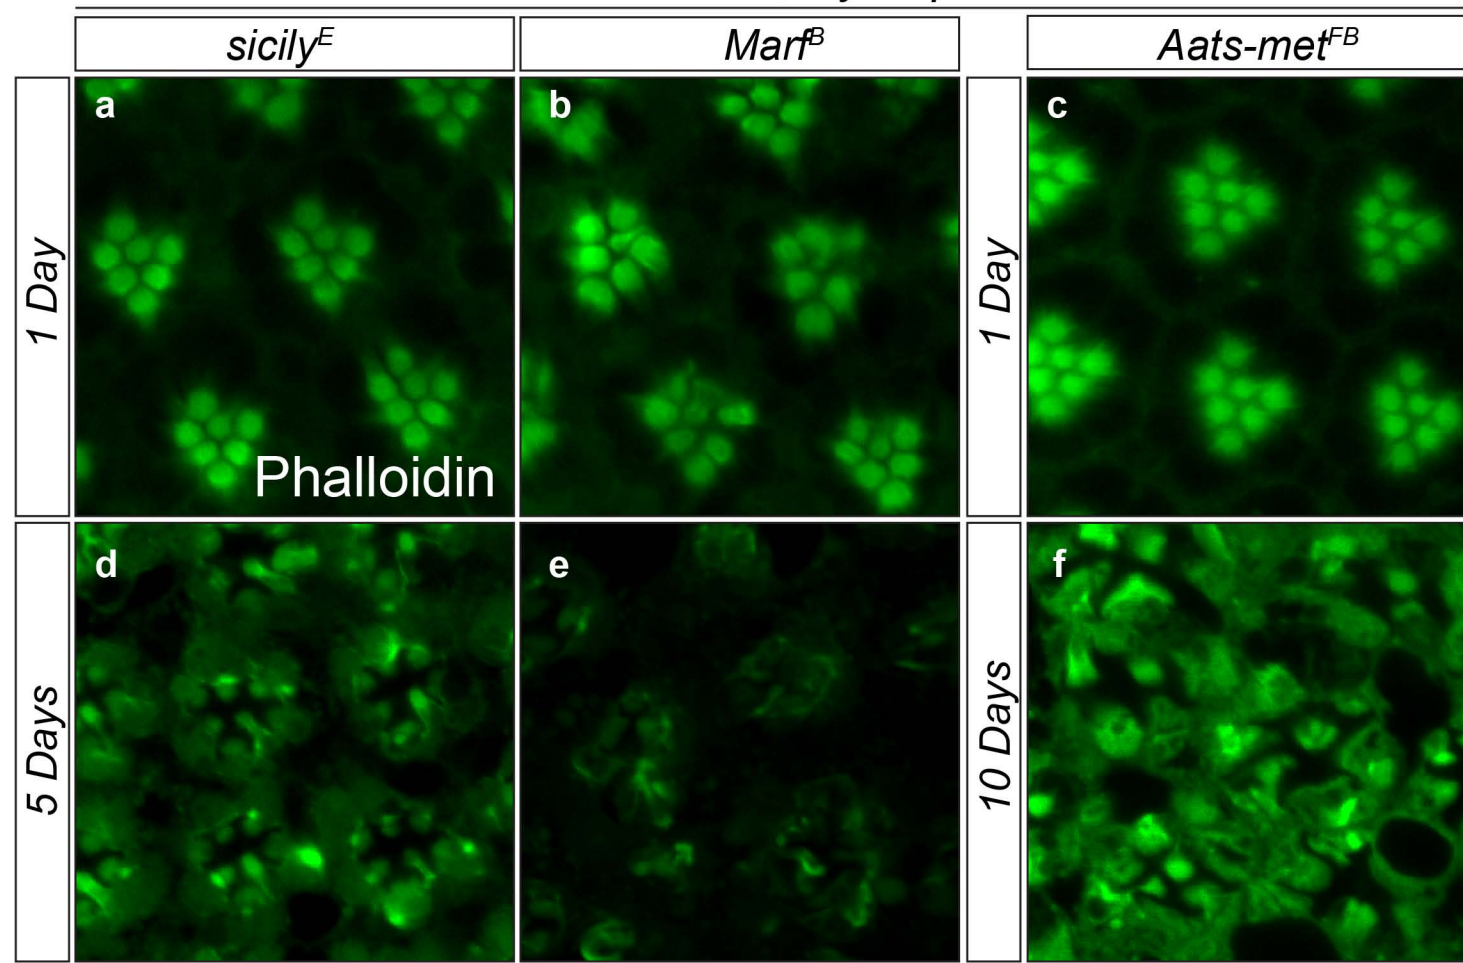

Supplement: NIHMS649341-supplement-1.pdf [file NIHMS649341-supplement-1.pdf]

Figure S2

A

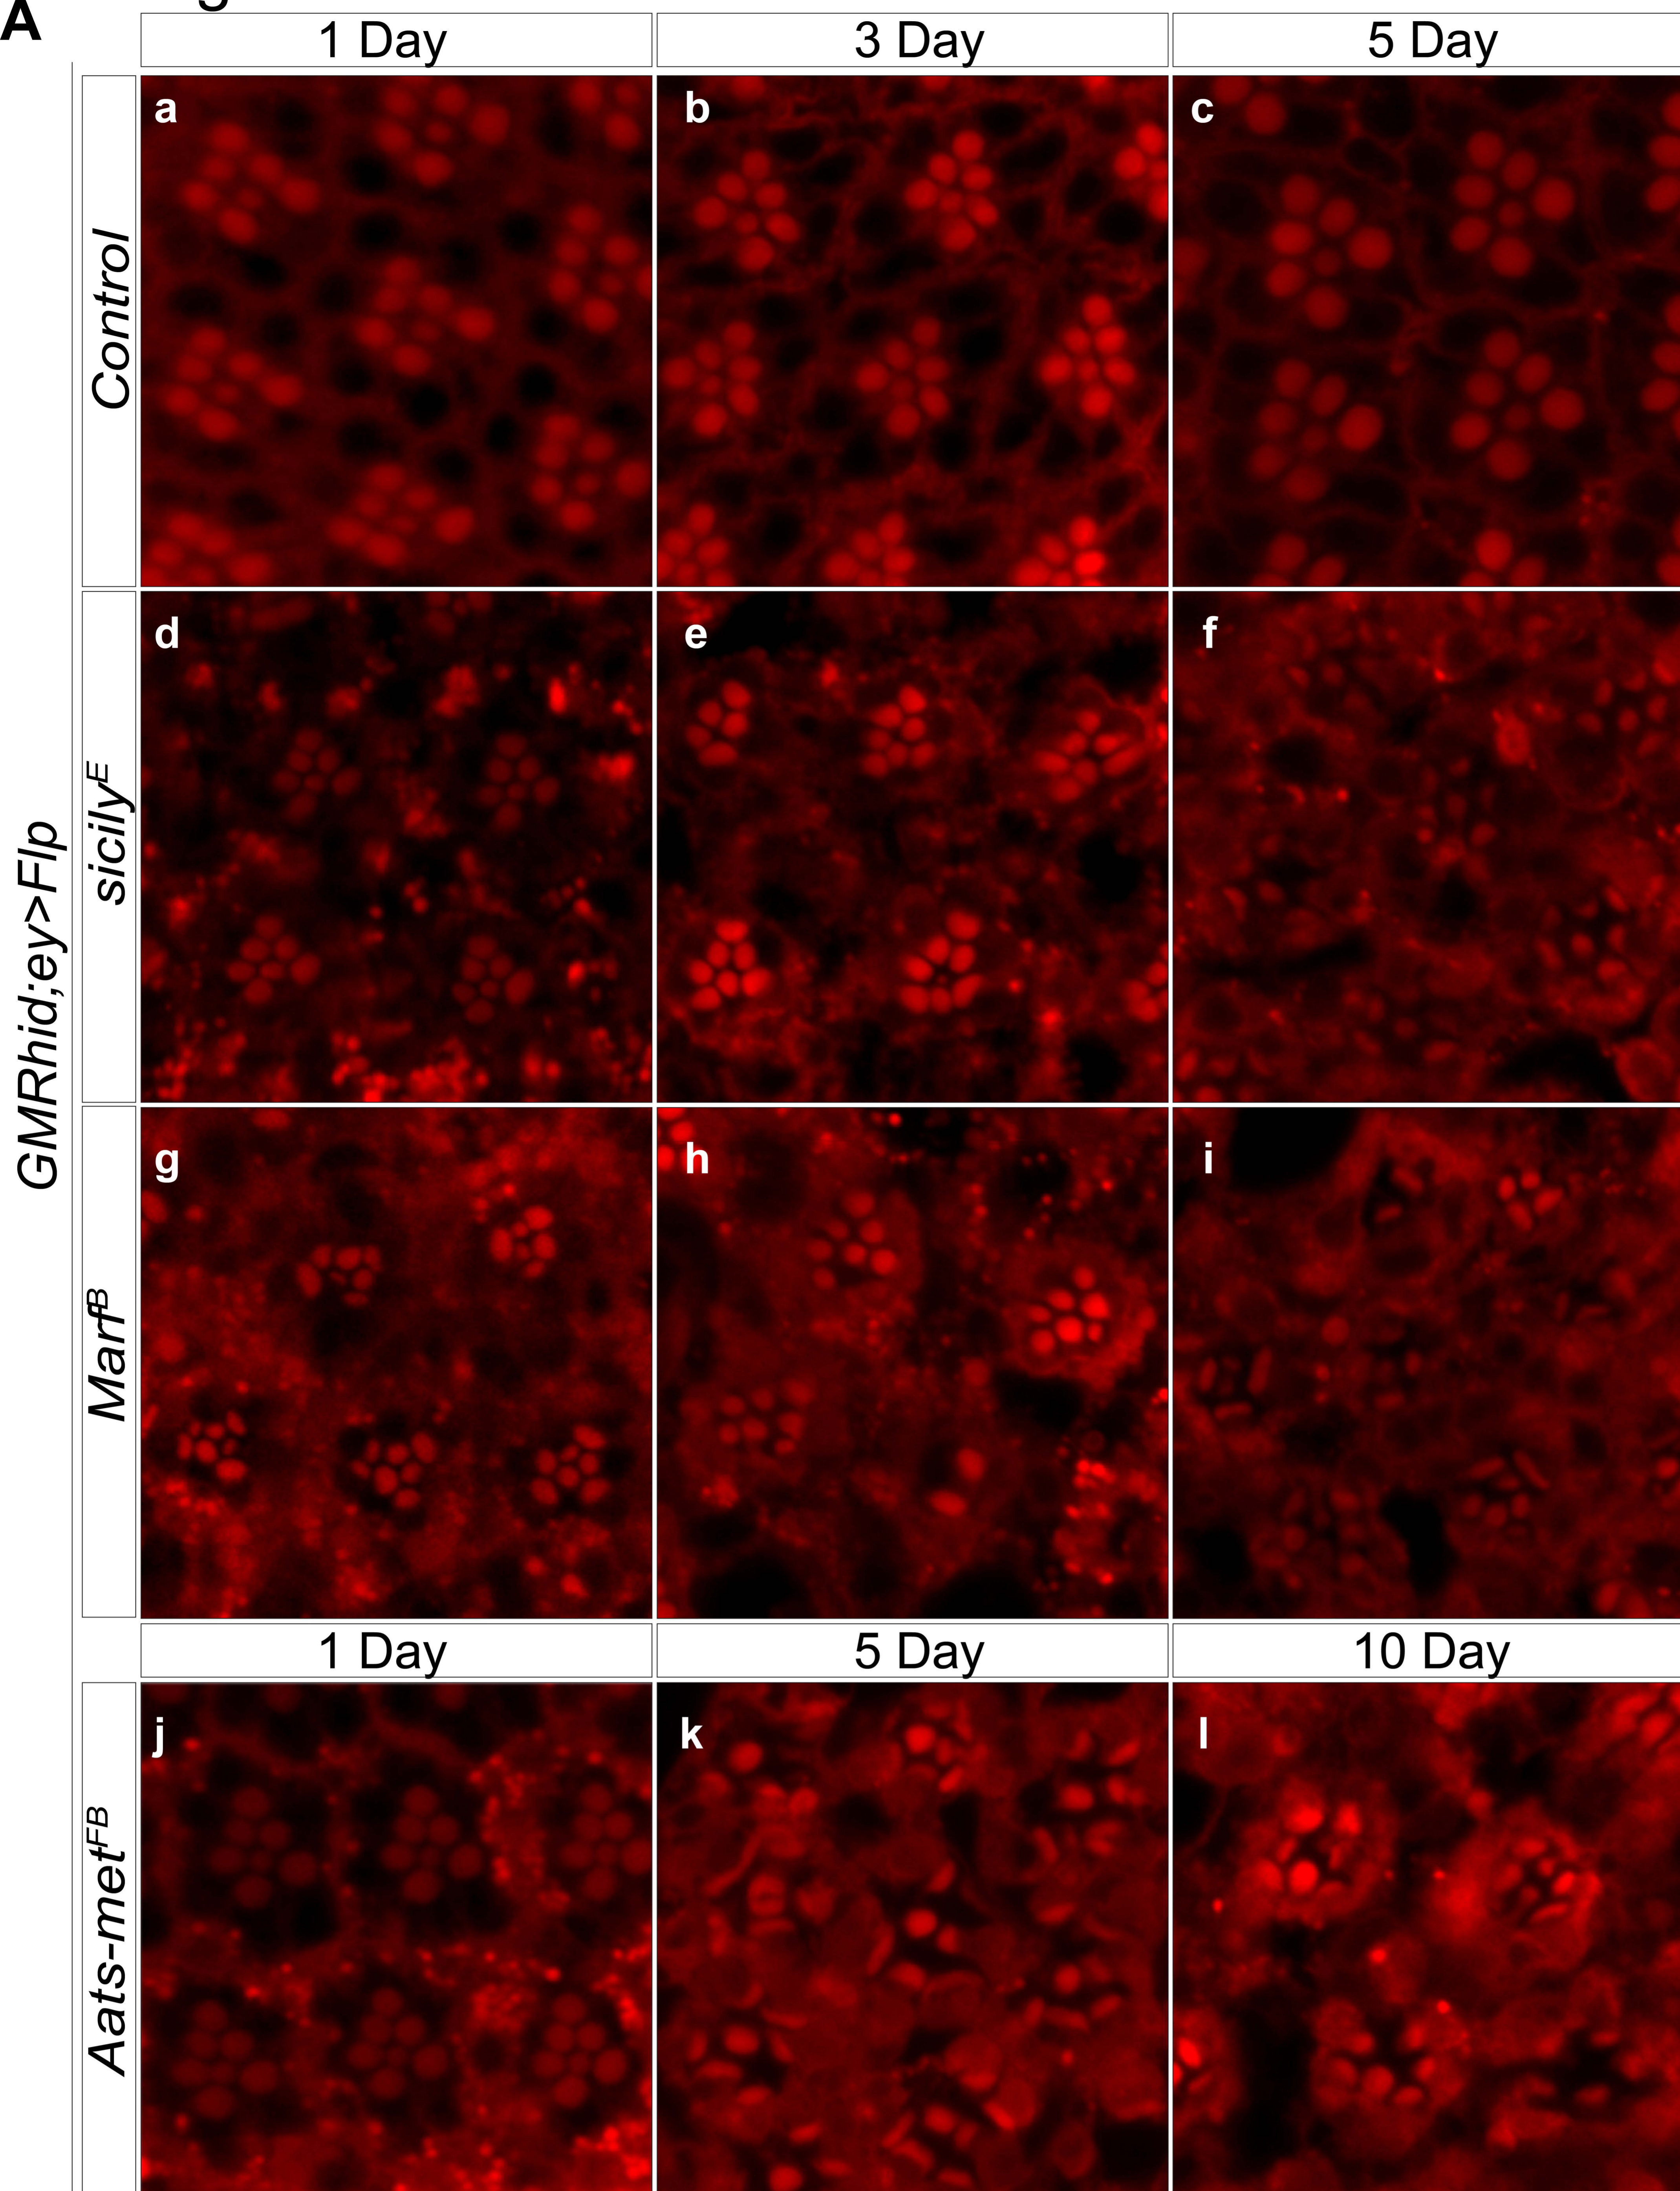

B

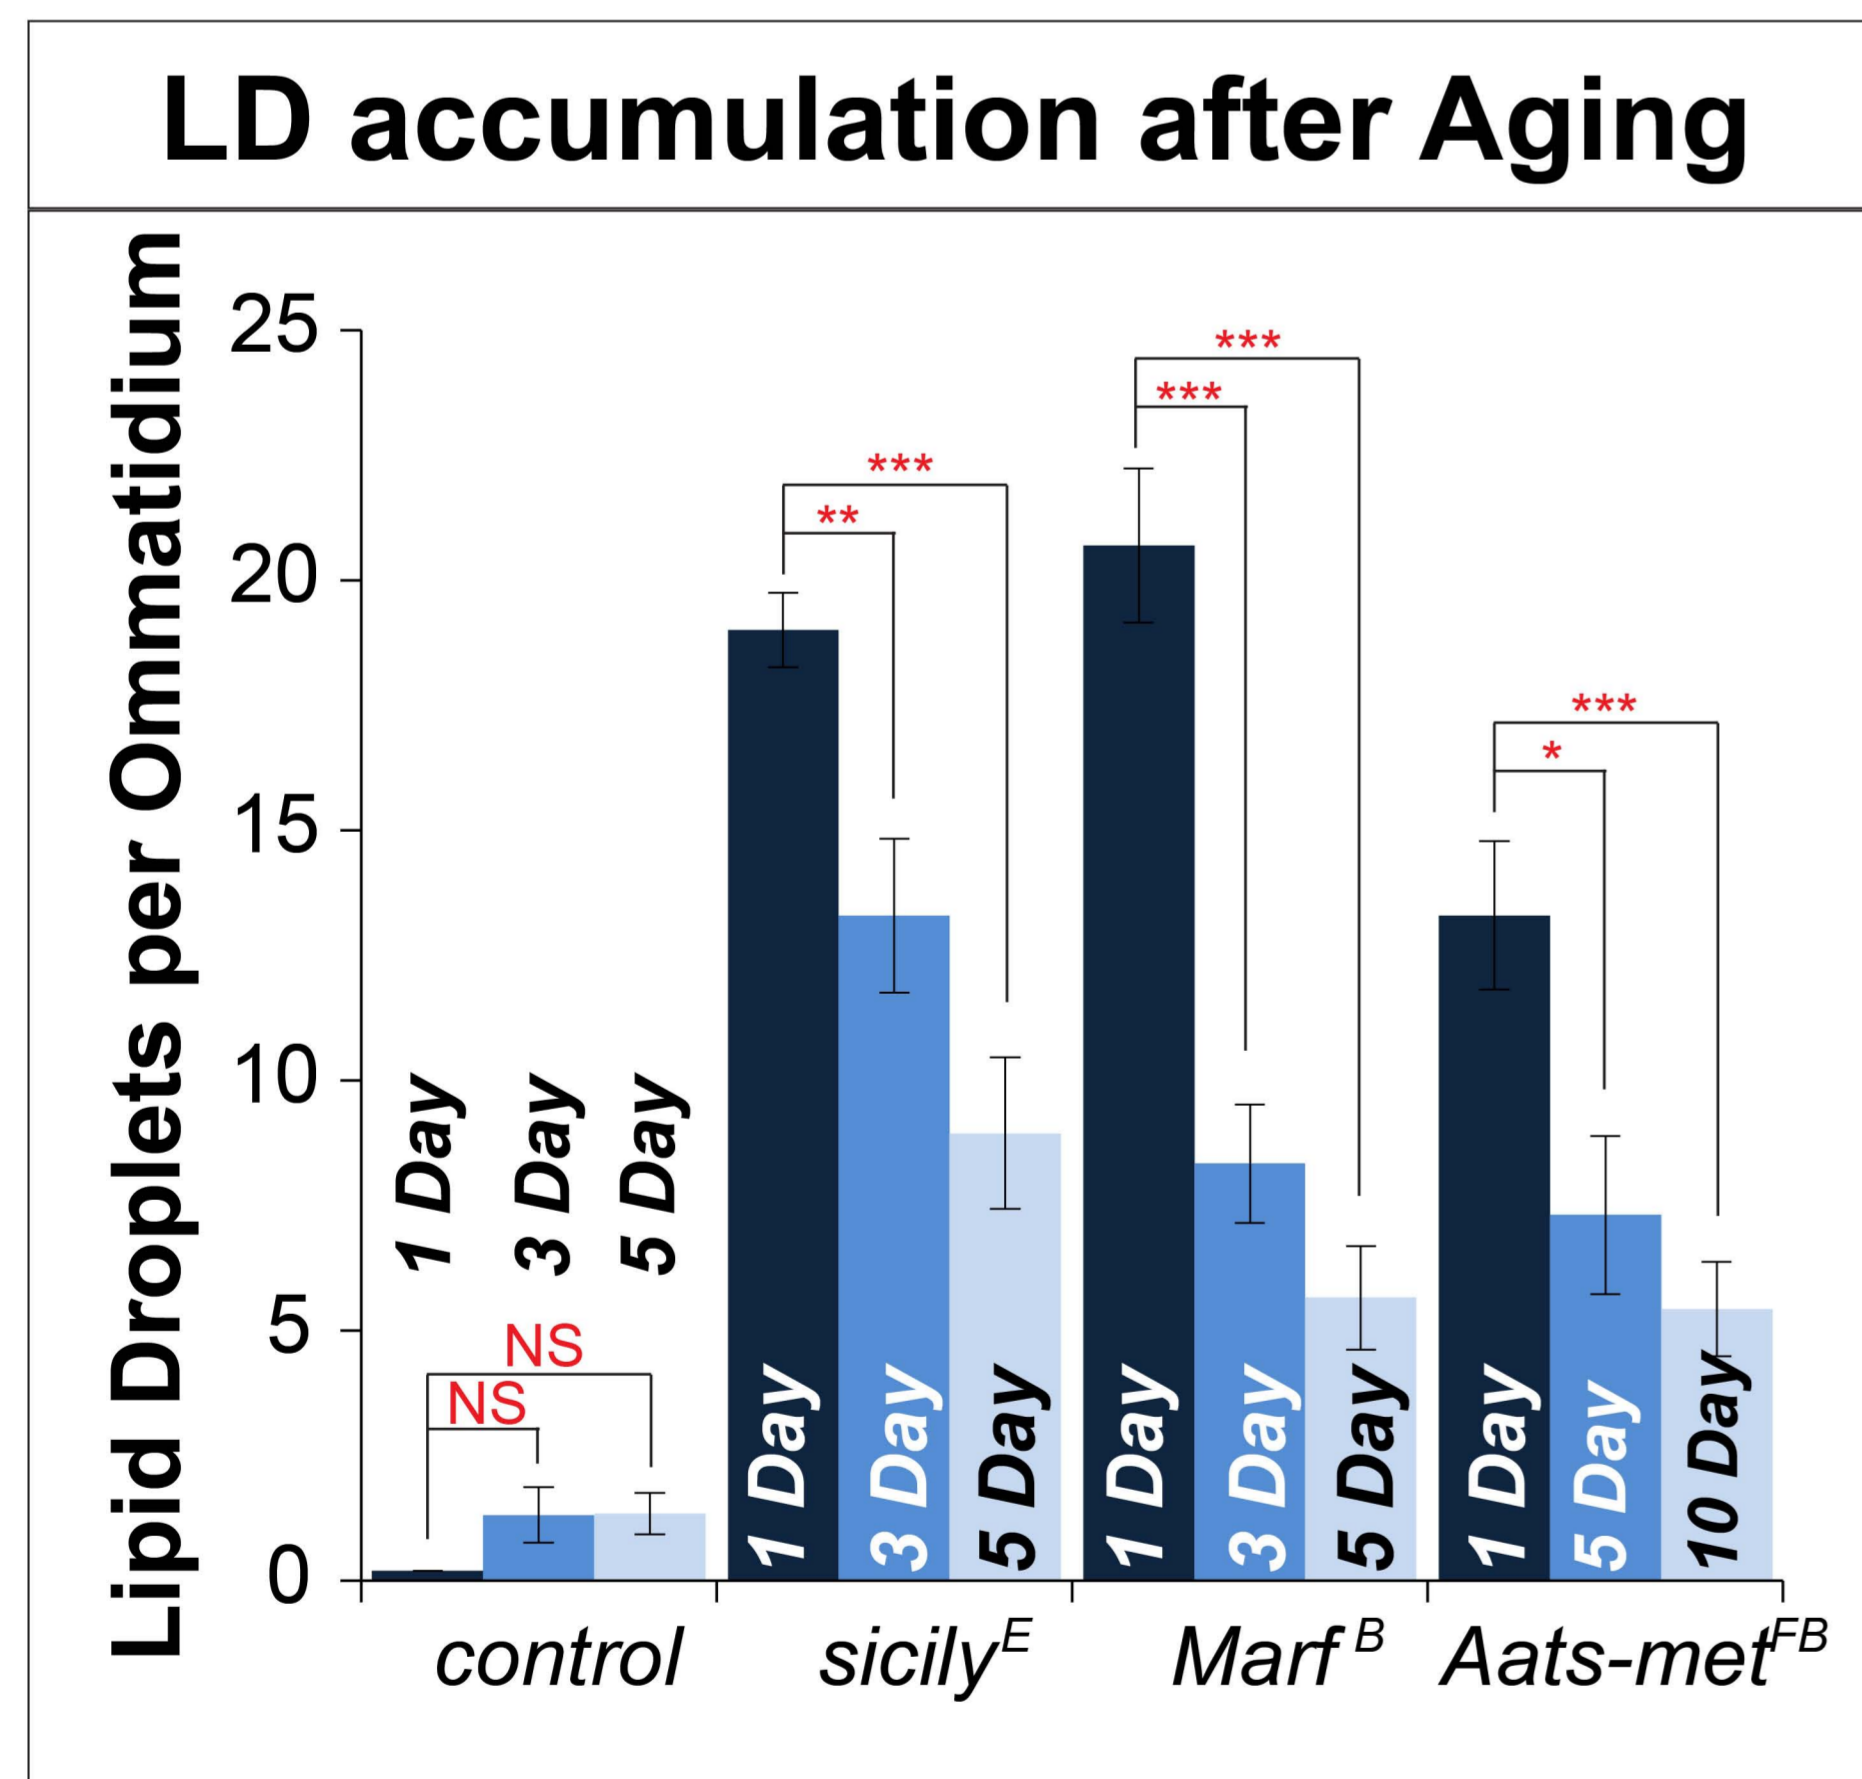

C

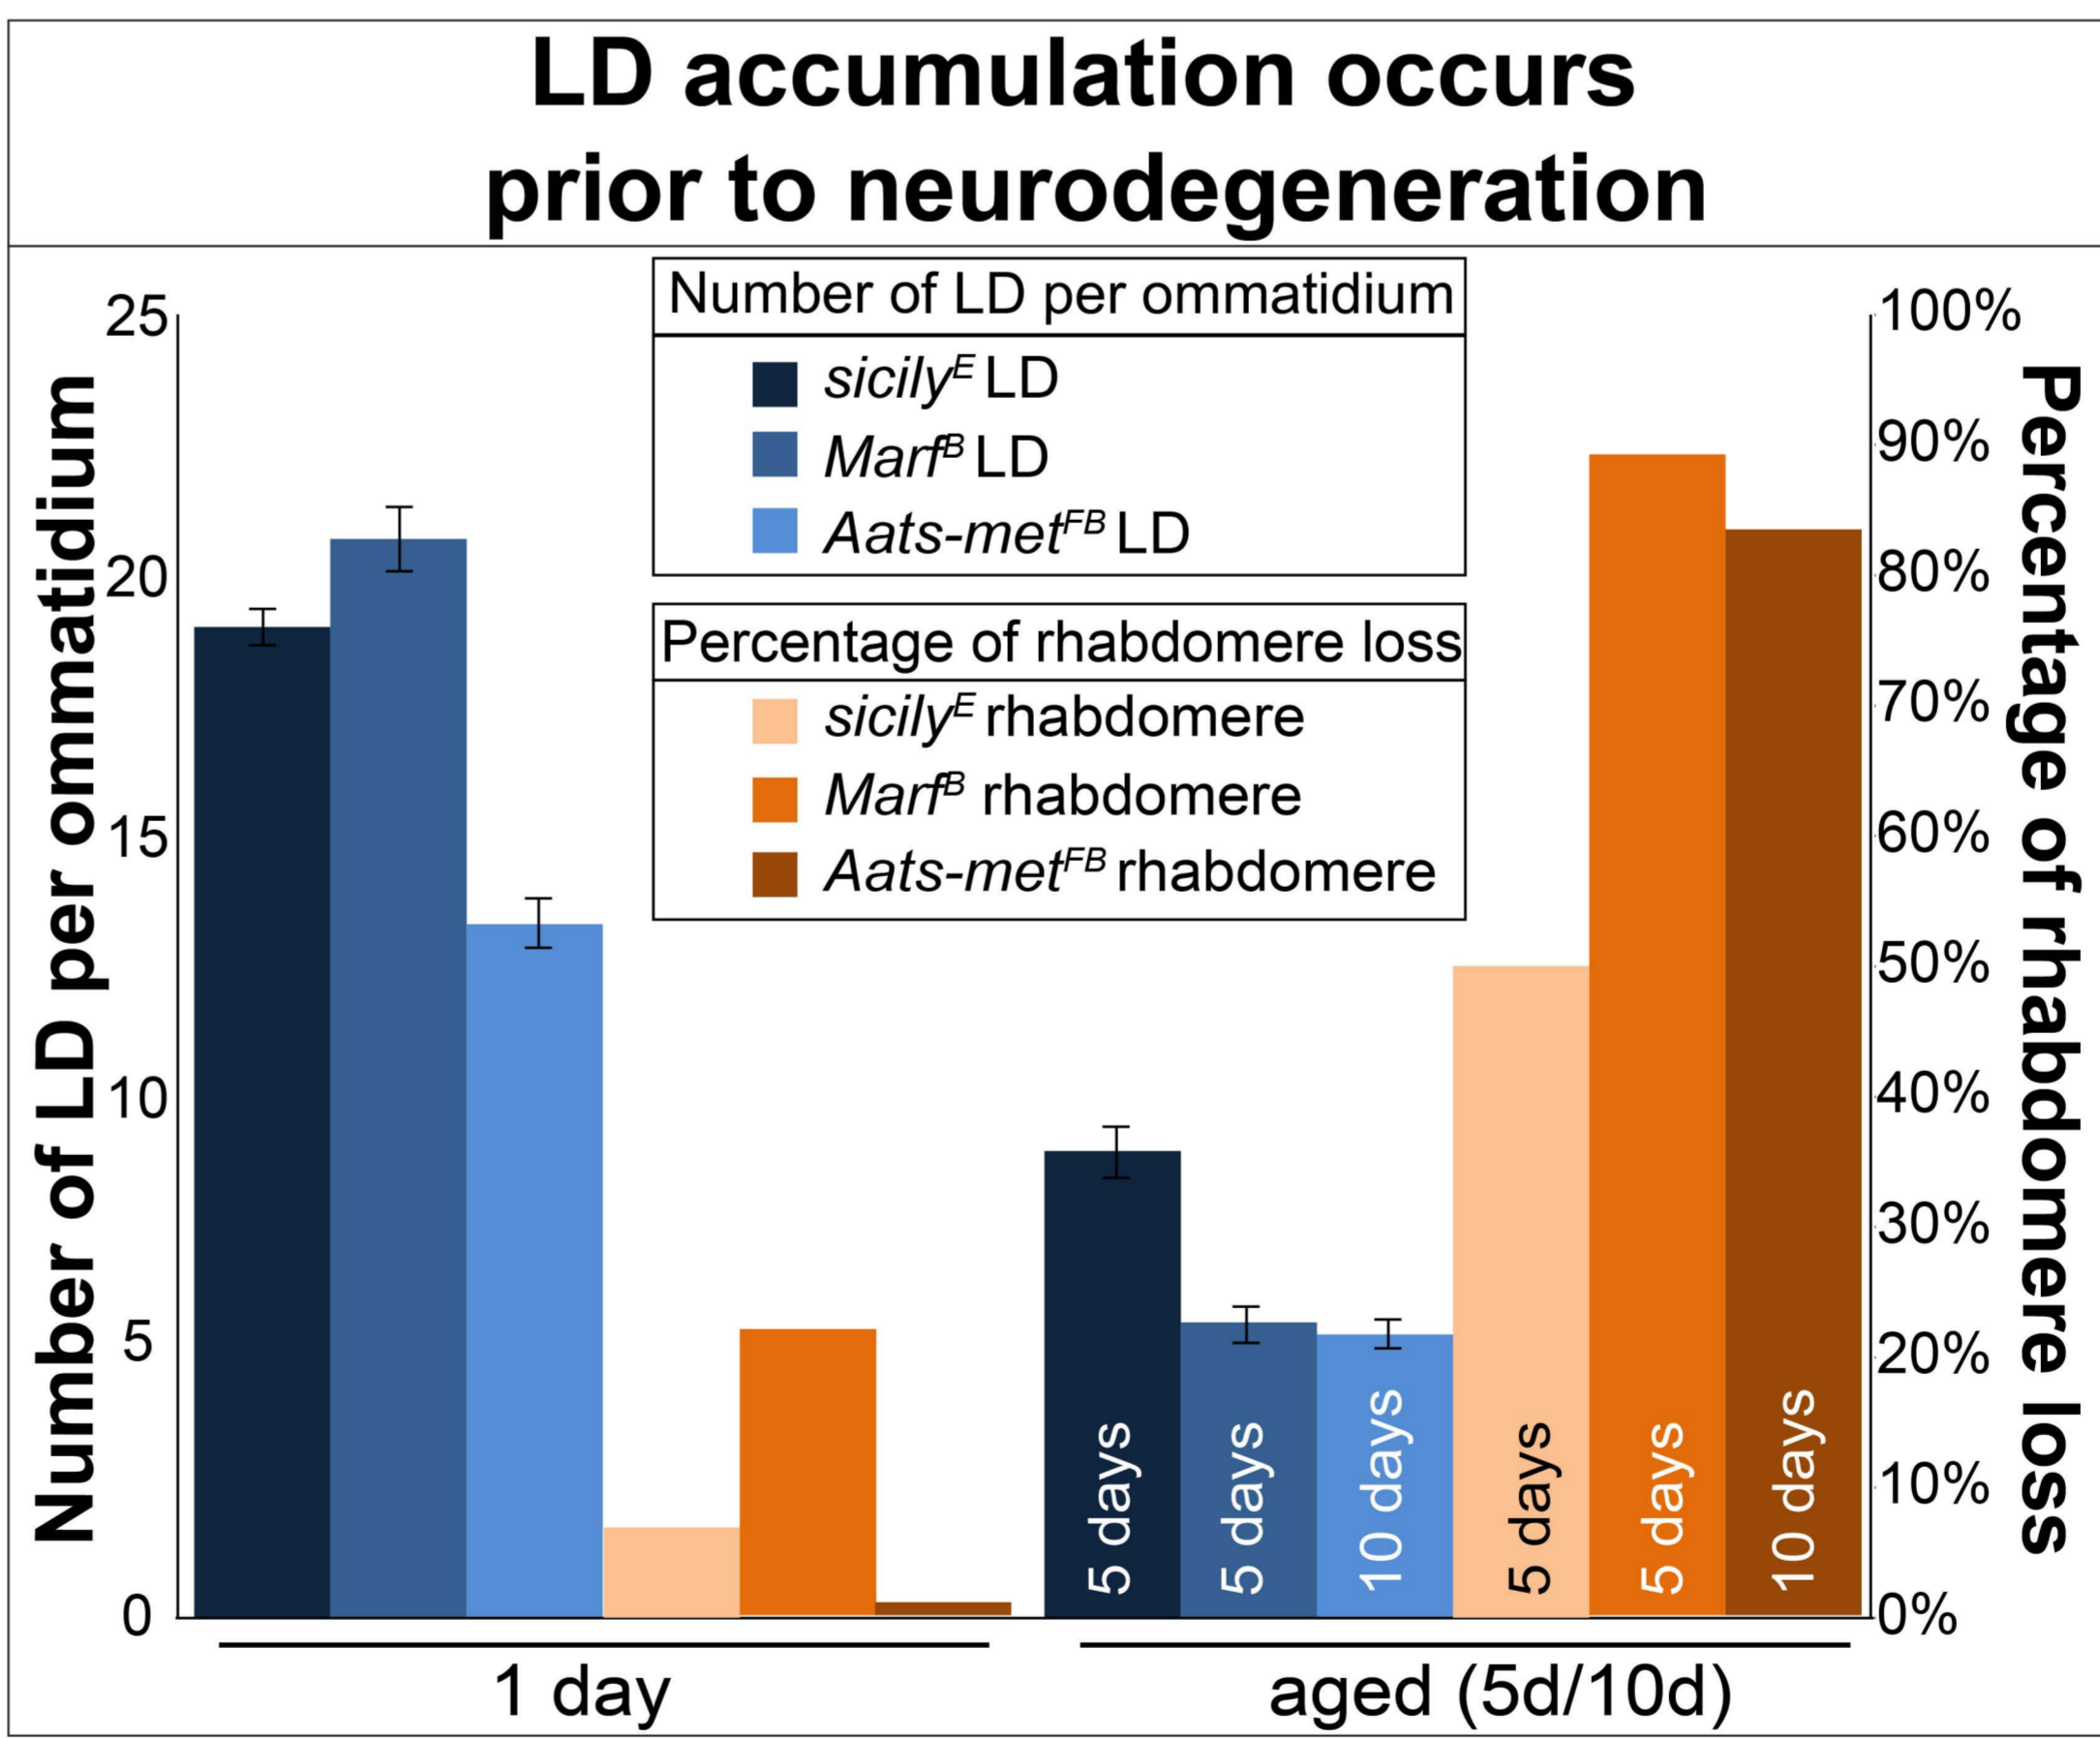

Supplement: NIHMS649341-supplement-2.pdf [file NIHMS649341-supplement-2.pdf]

Figure S3

**A**

***GMR-GAL4***

*ND42 IR*

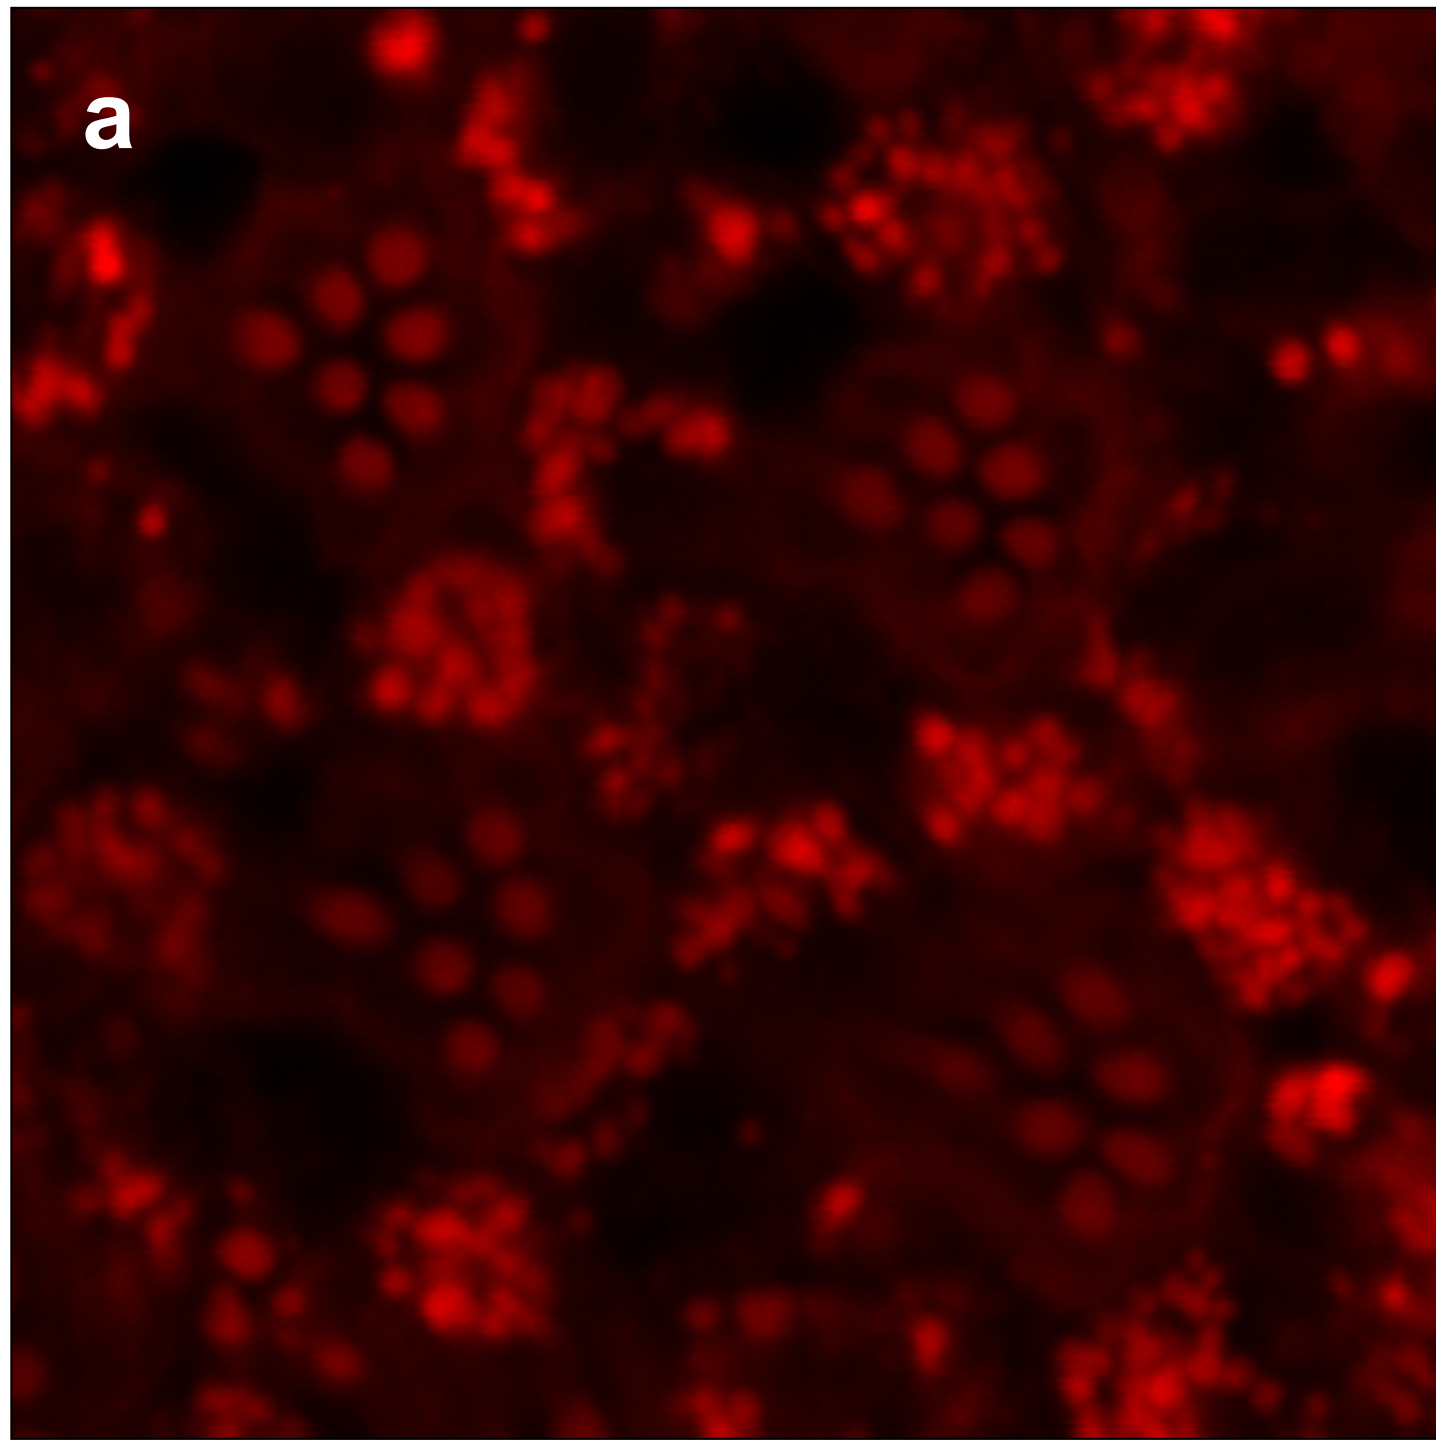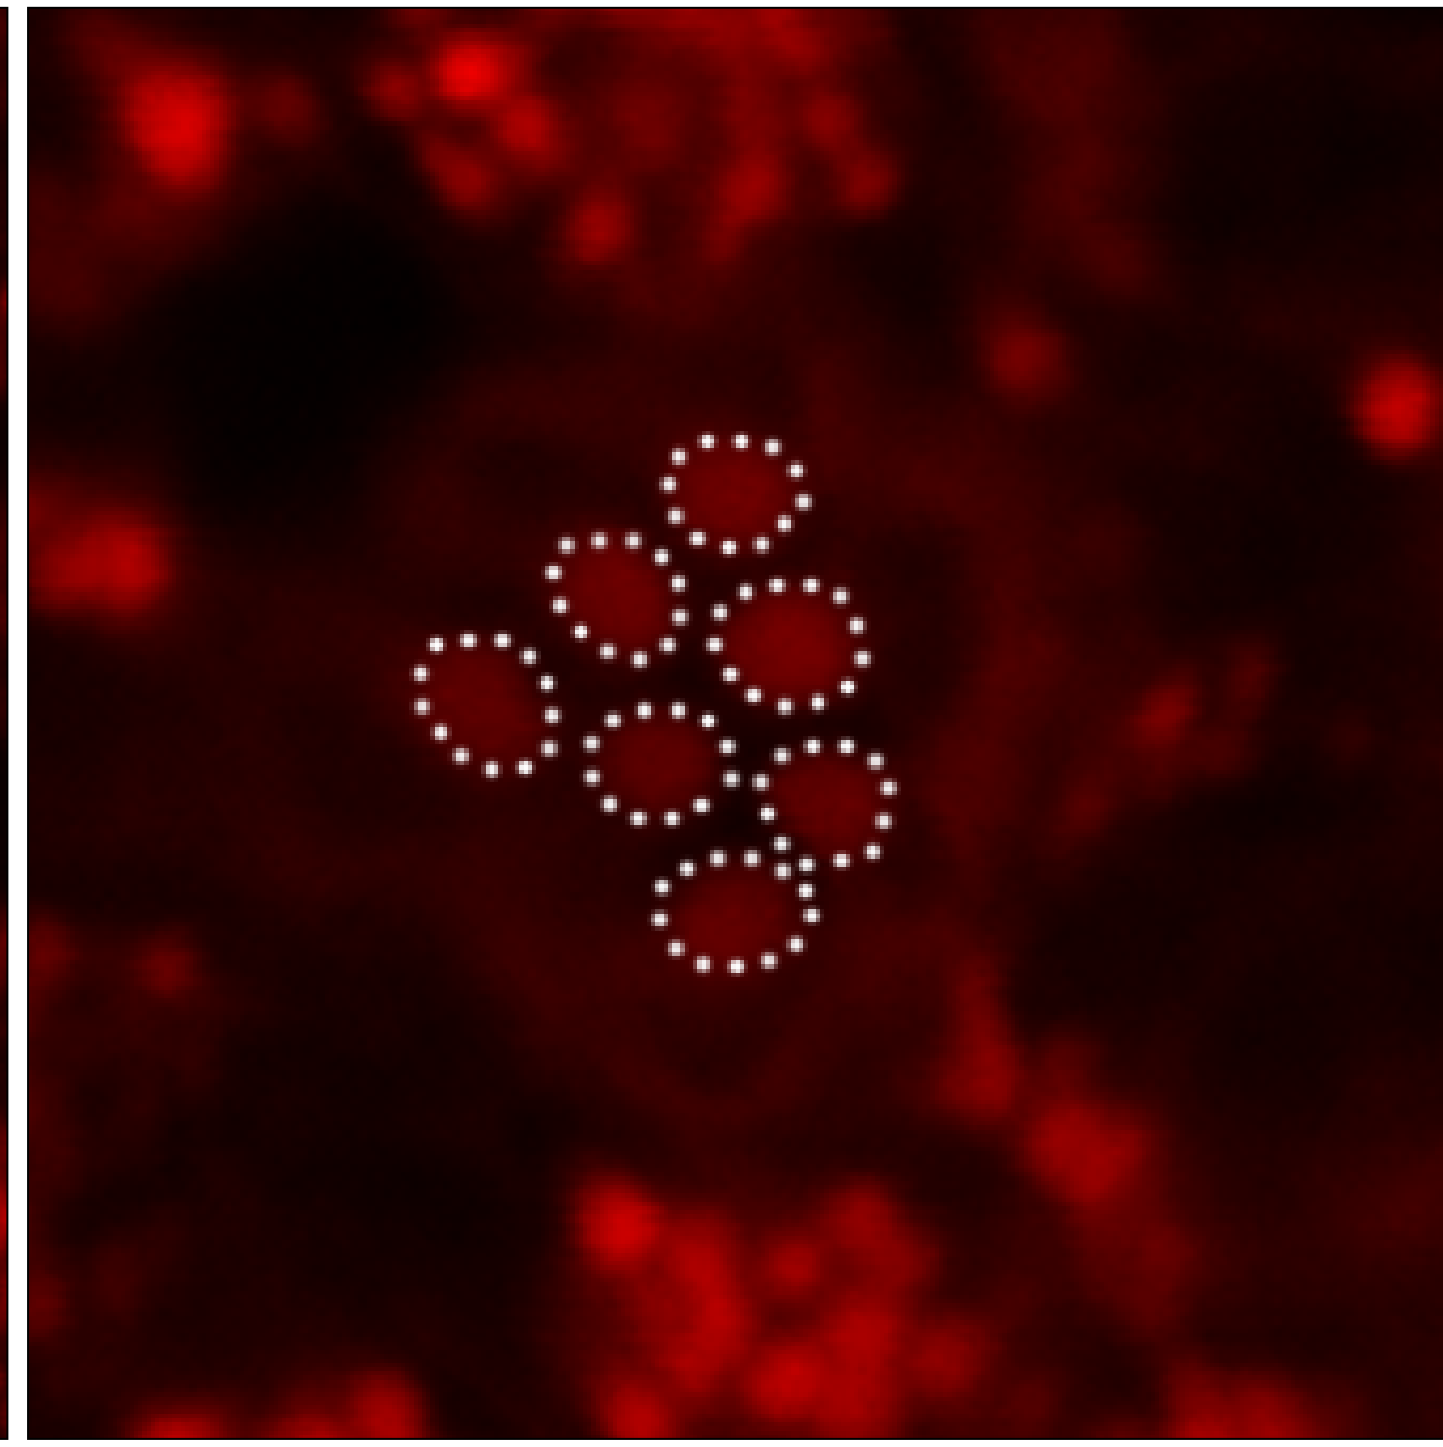

*parkin IR*

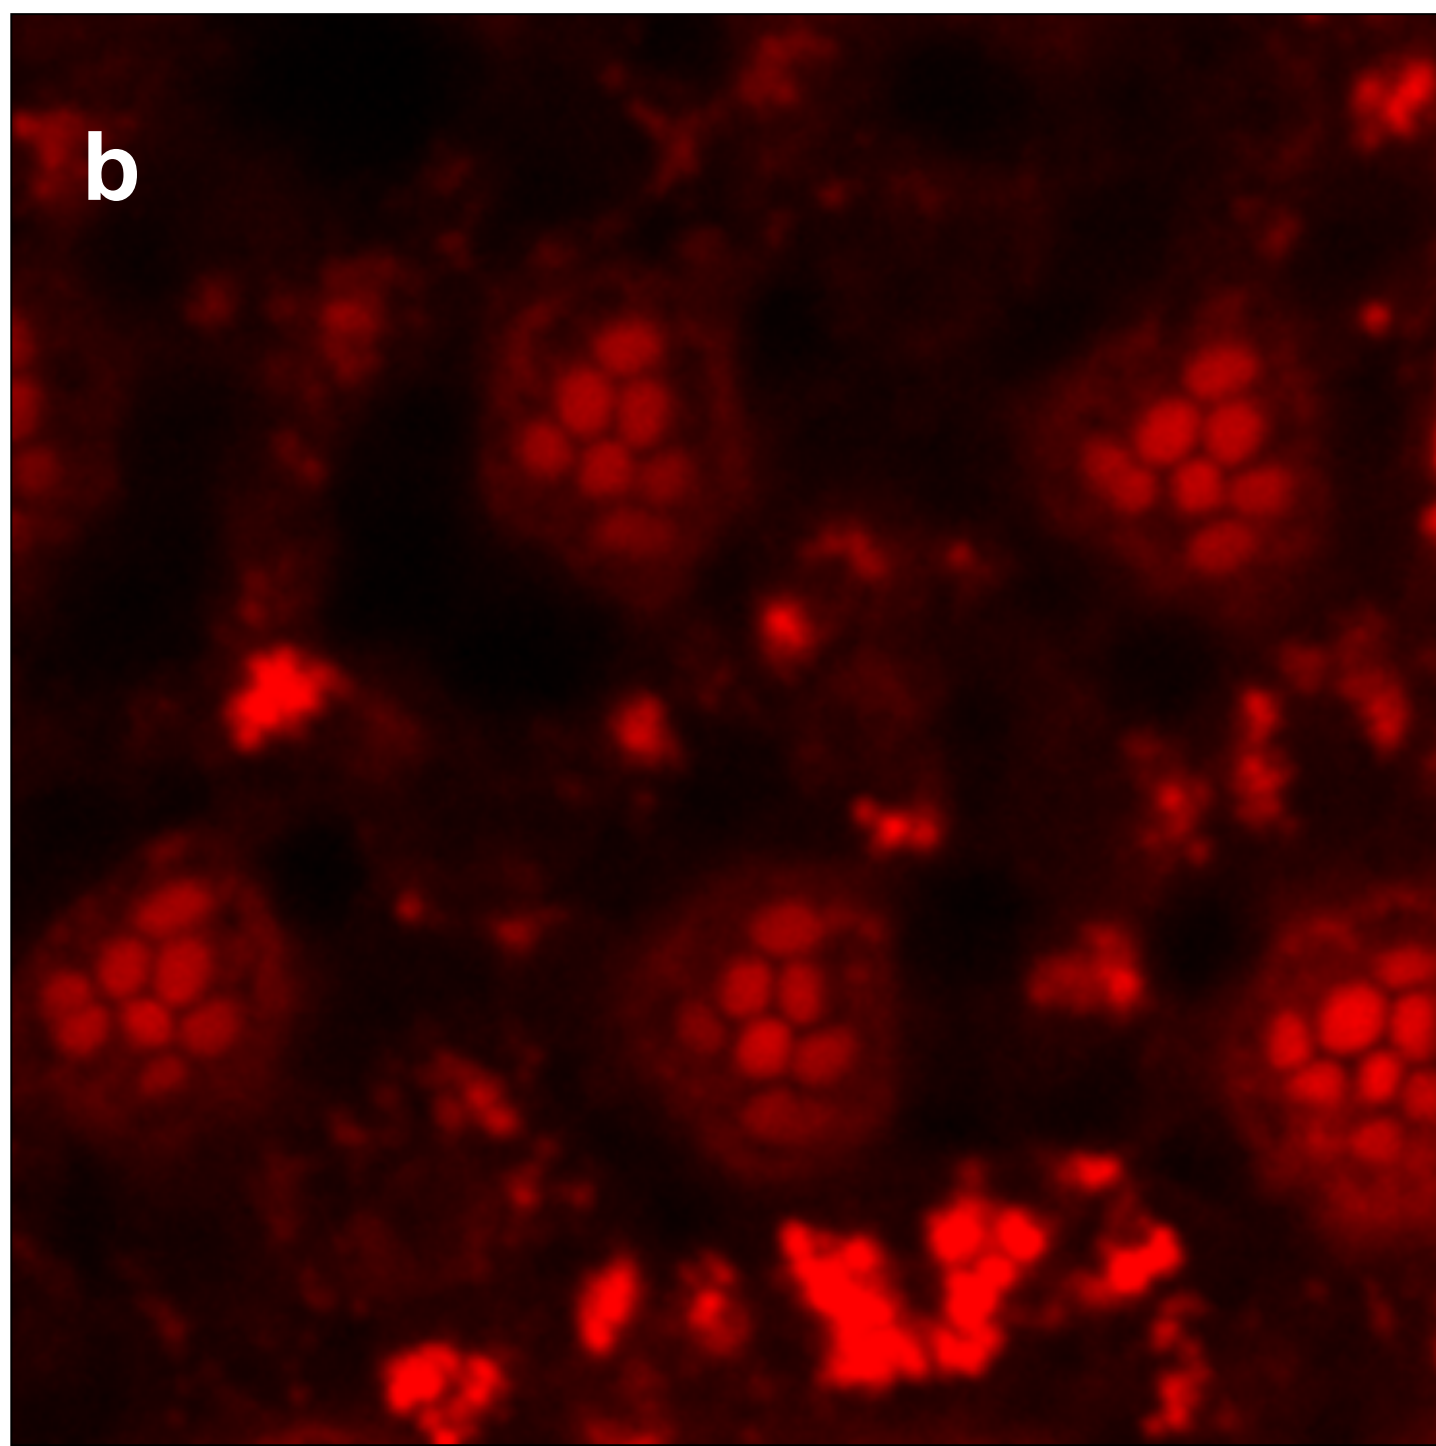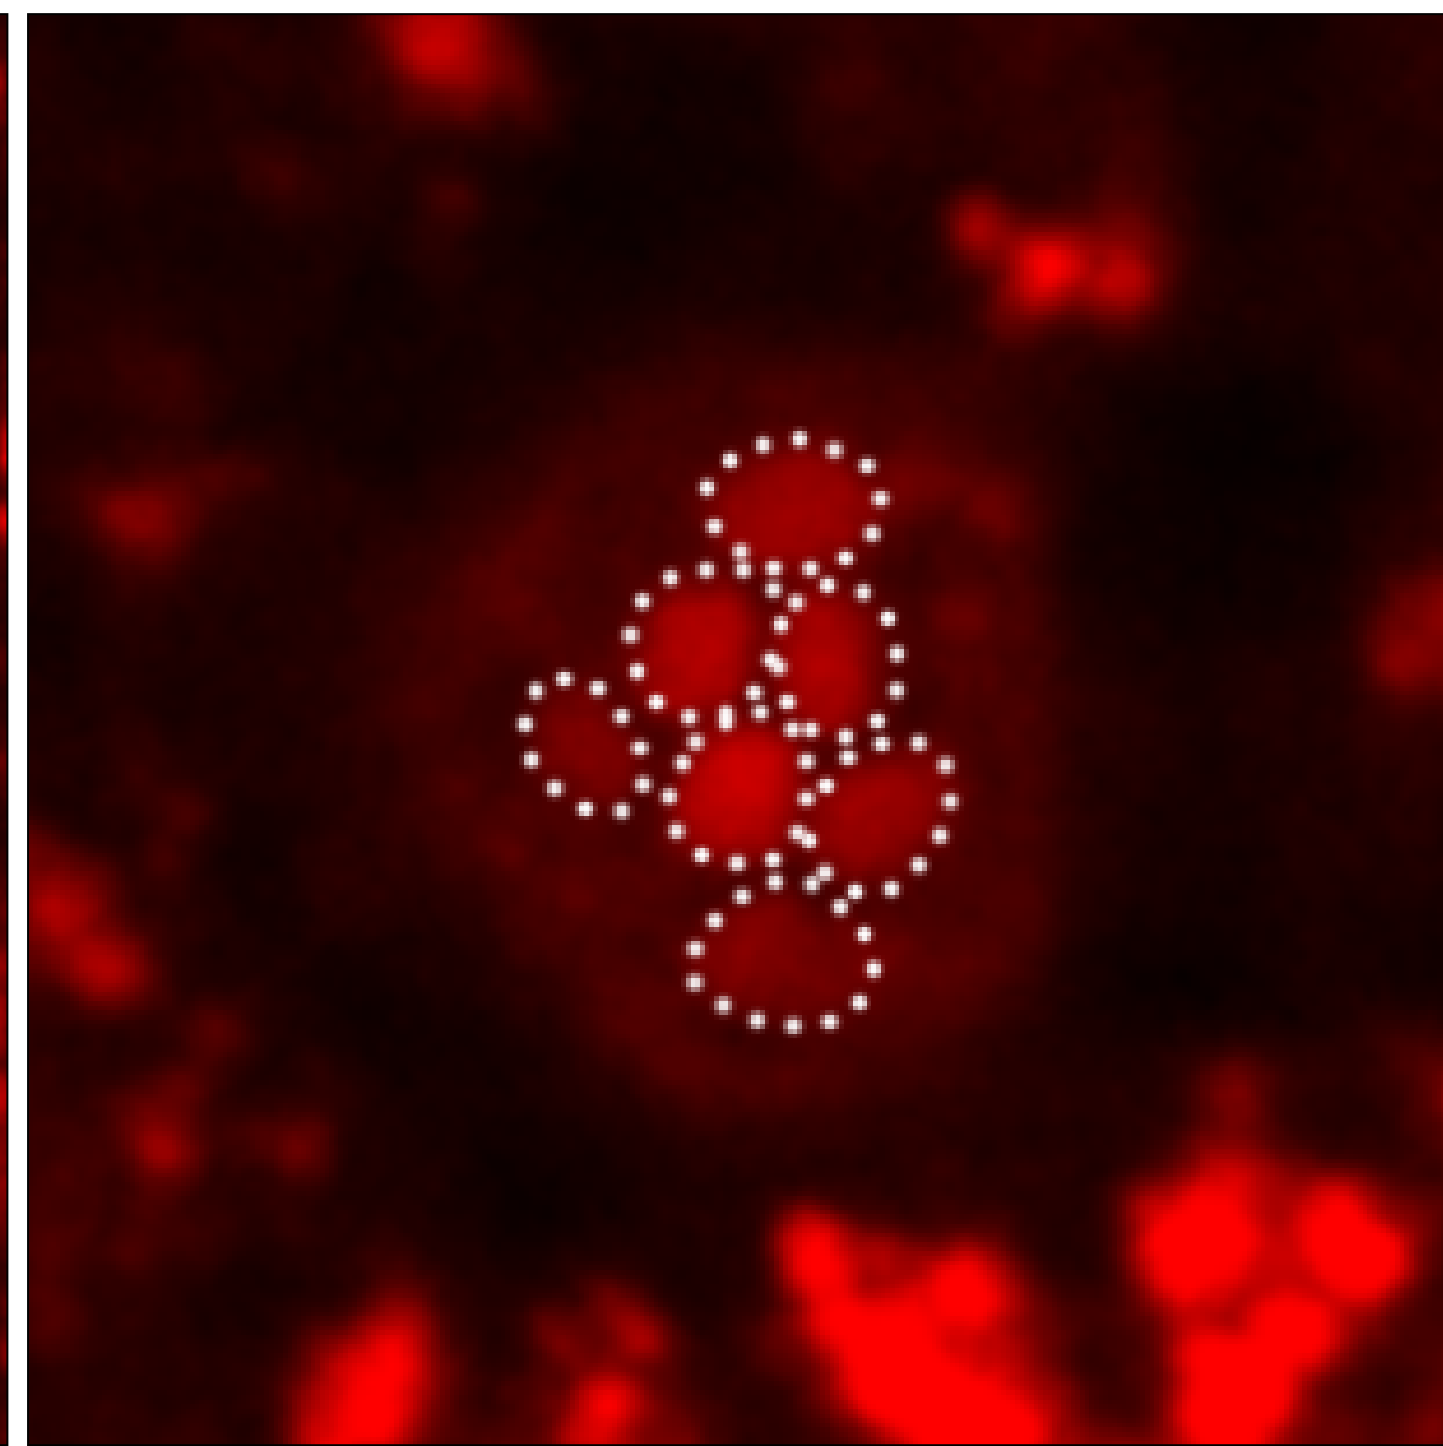

**Mutant**

*Pink1<sup>5</sup>*

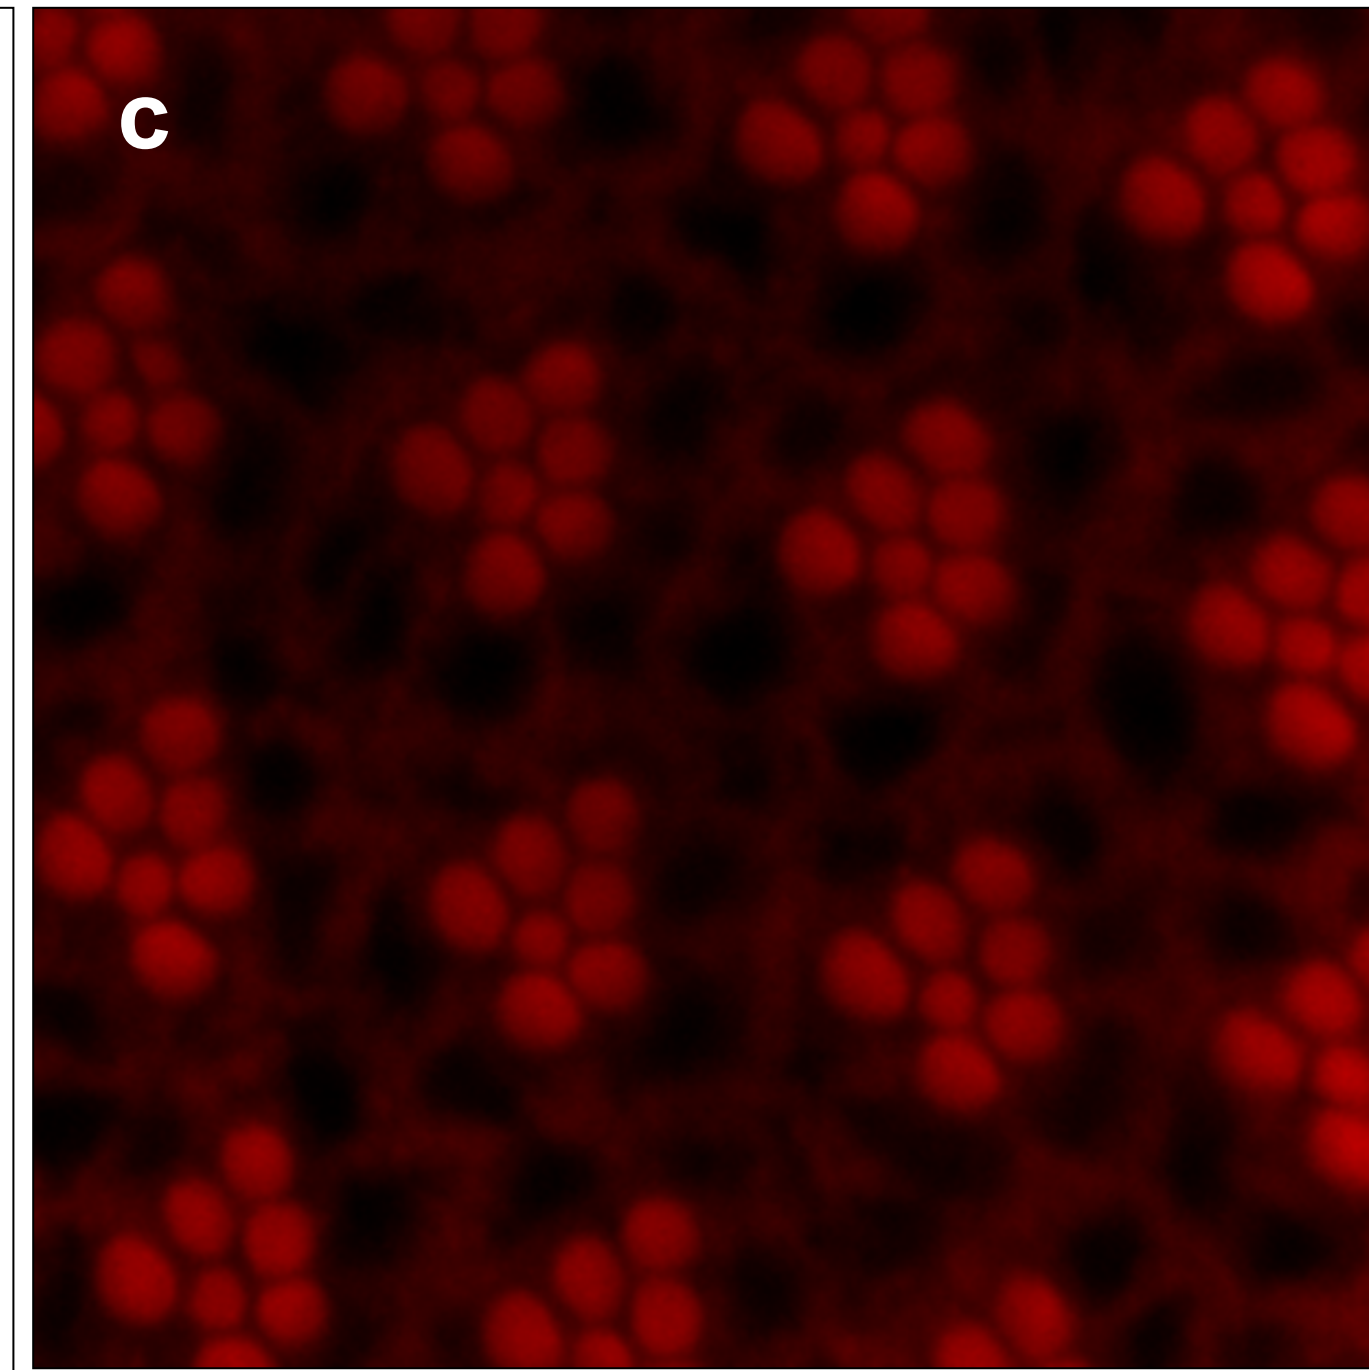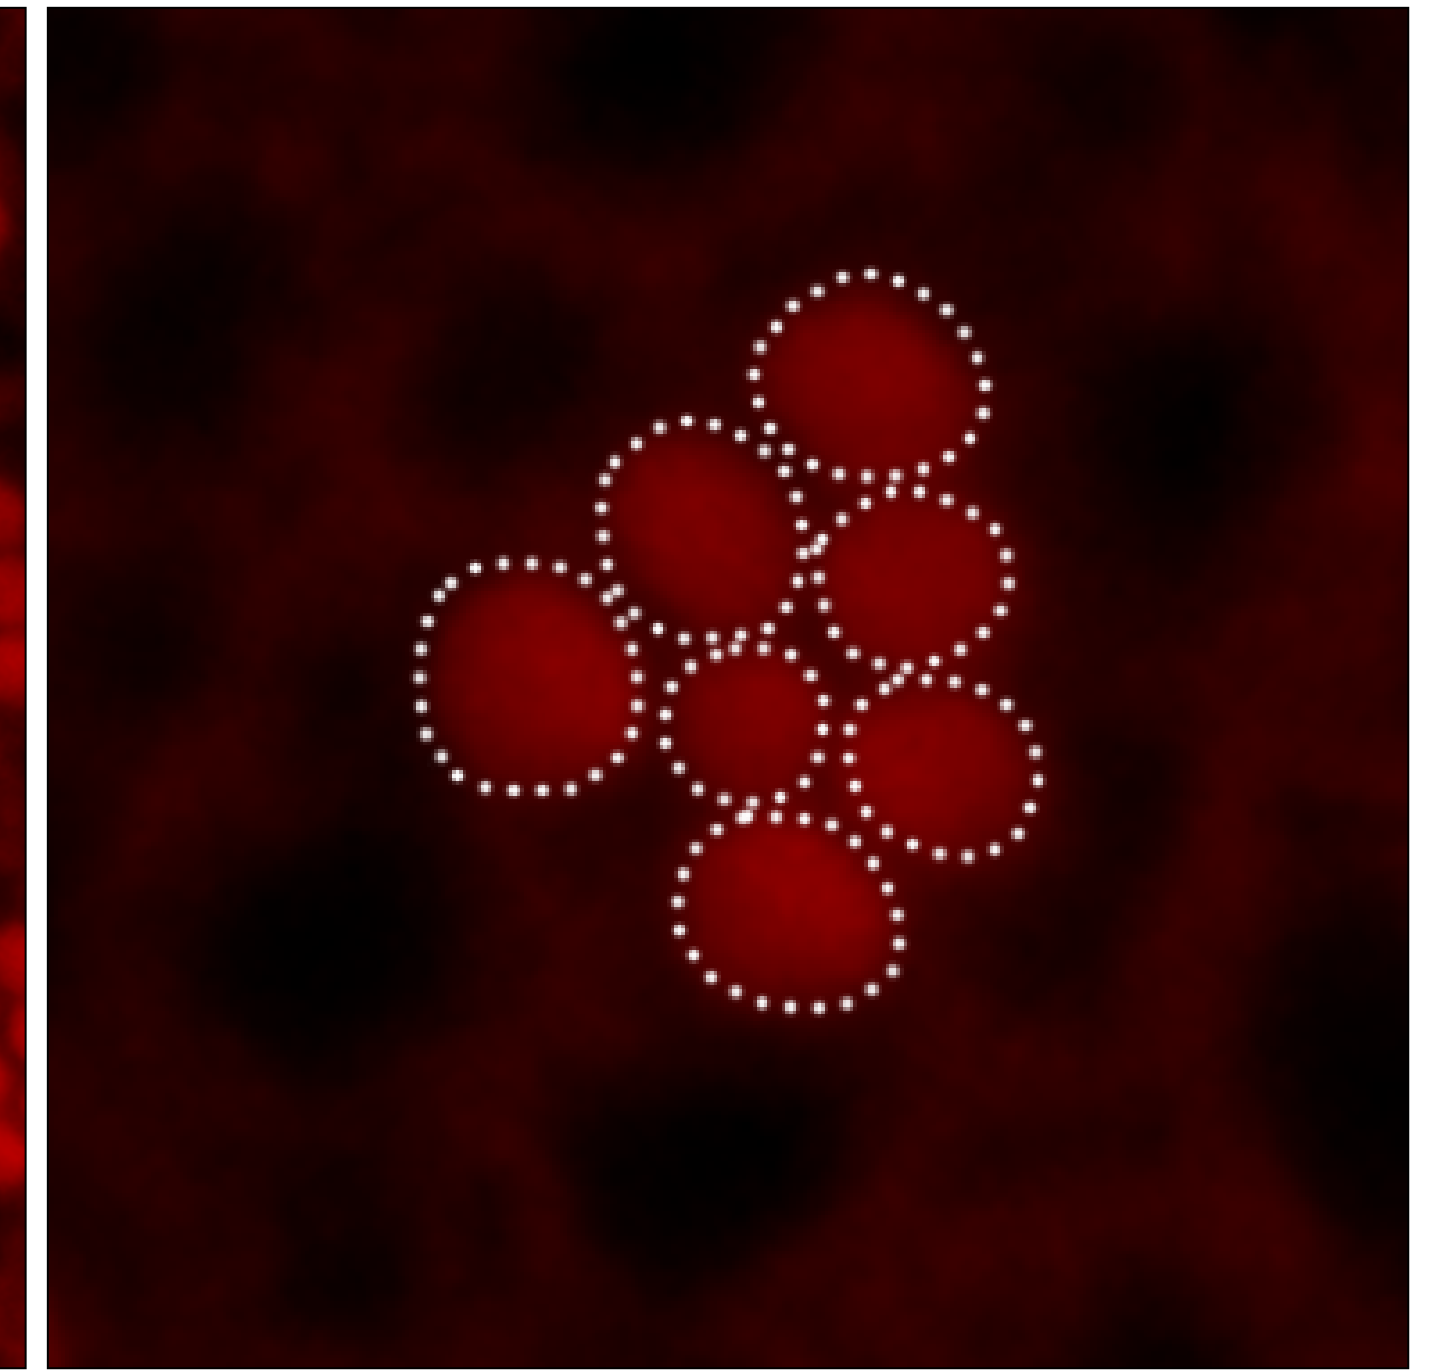

***Ey>Flp***

*Drp1<sup>2</sup>*

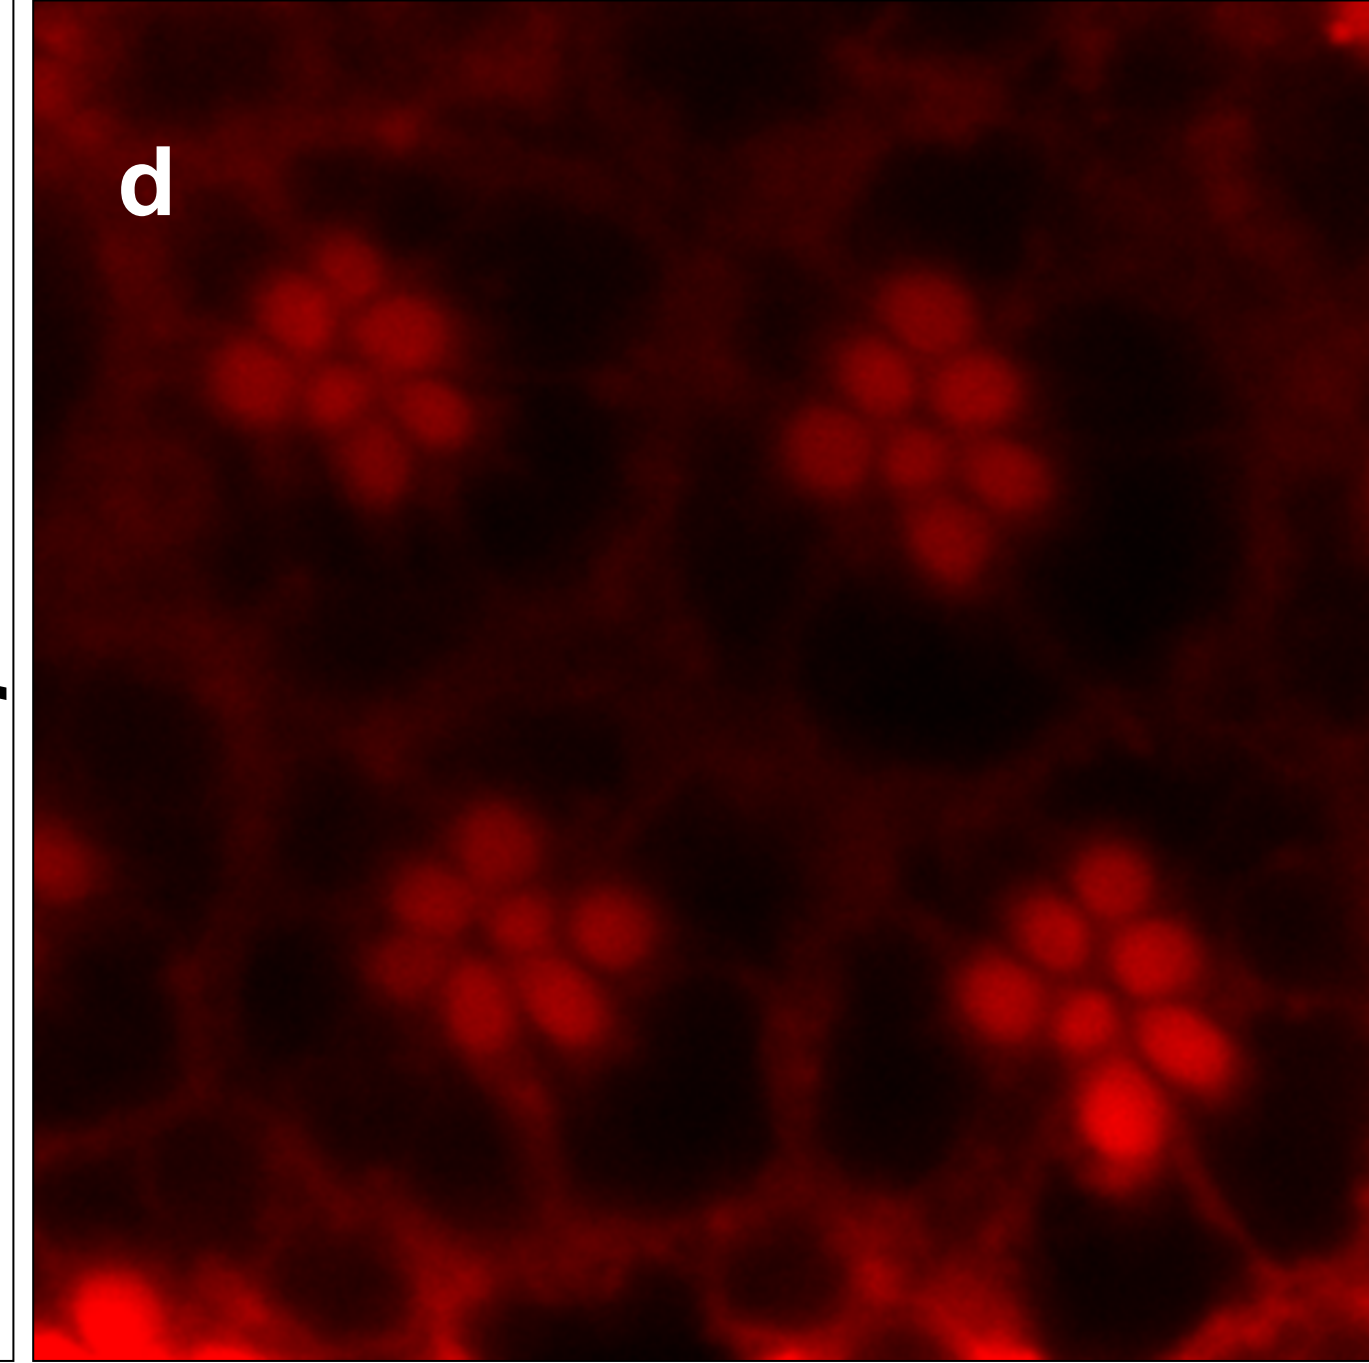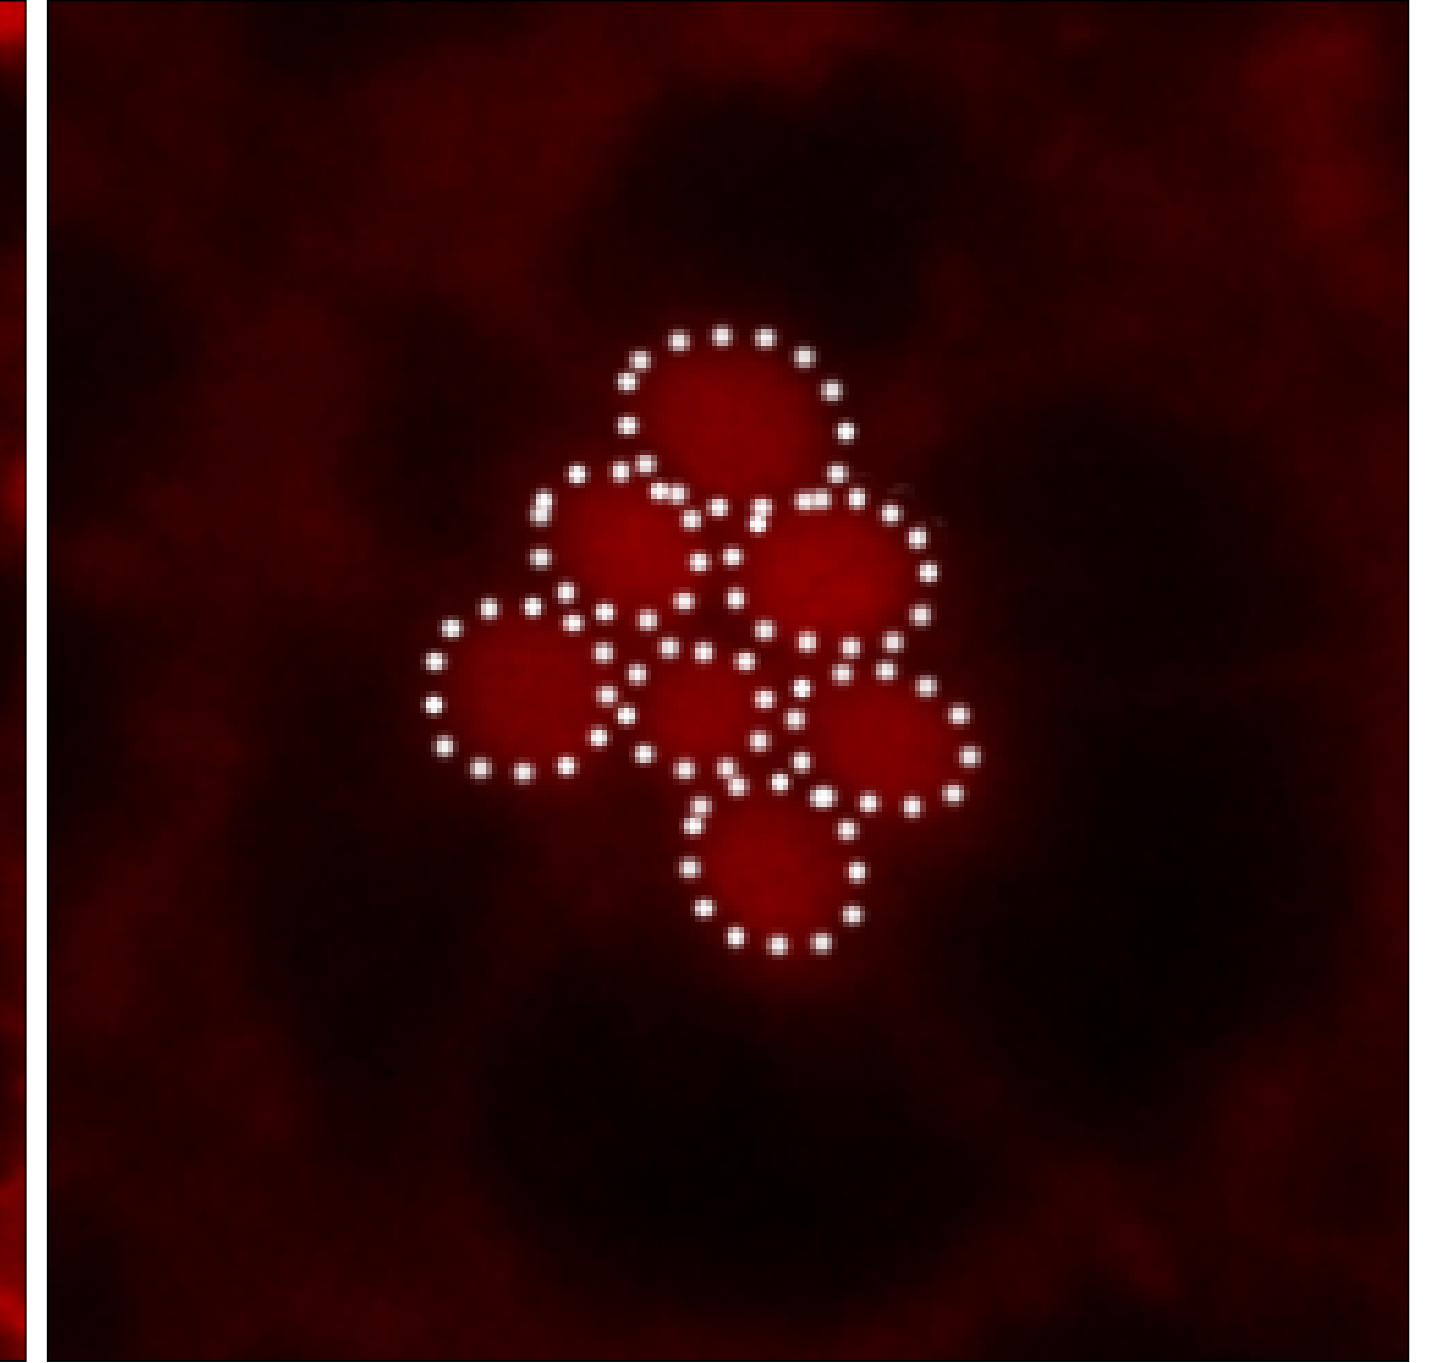

Supplement: NIHMS649341-supplement-3.pdf [file NIHMS649341-supplement-3.pdf]

# Figure S5

**A**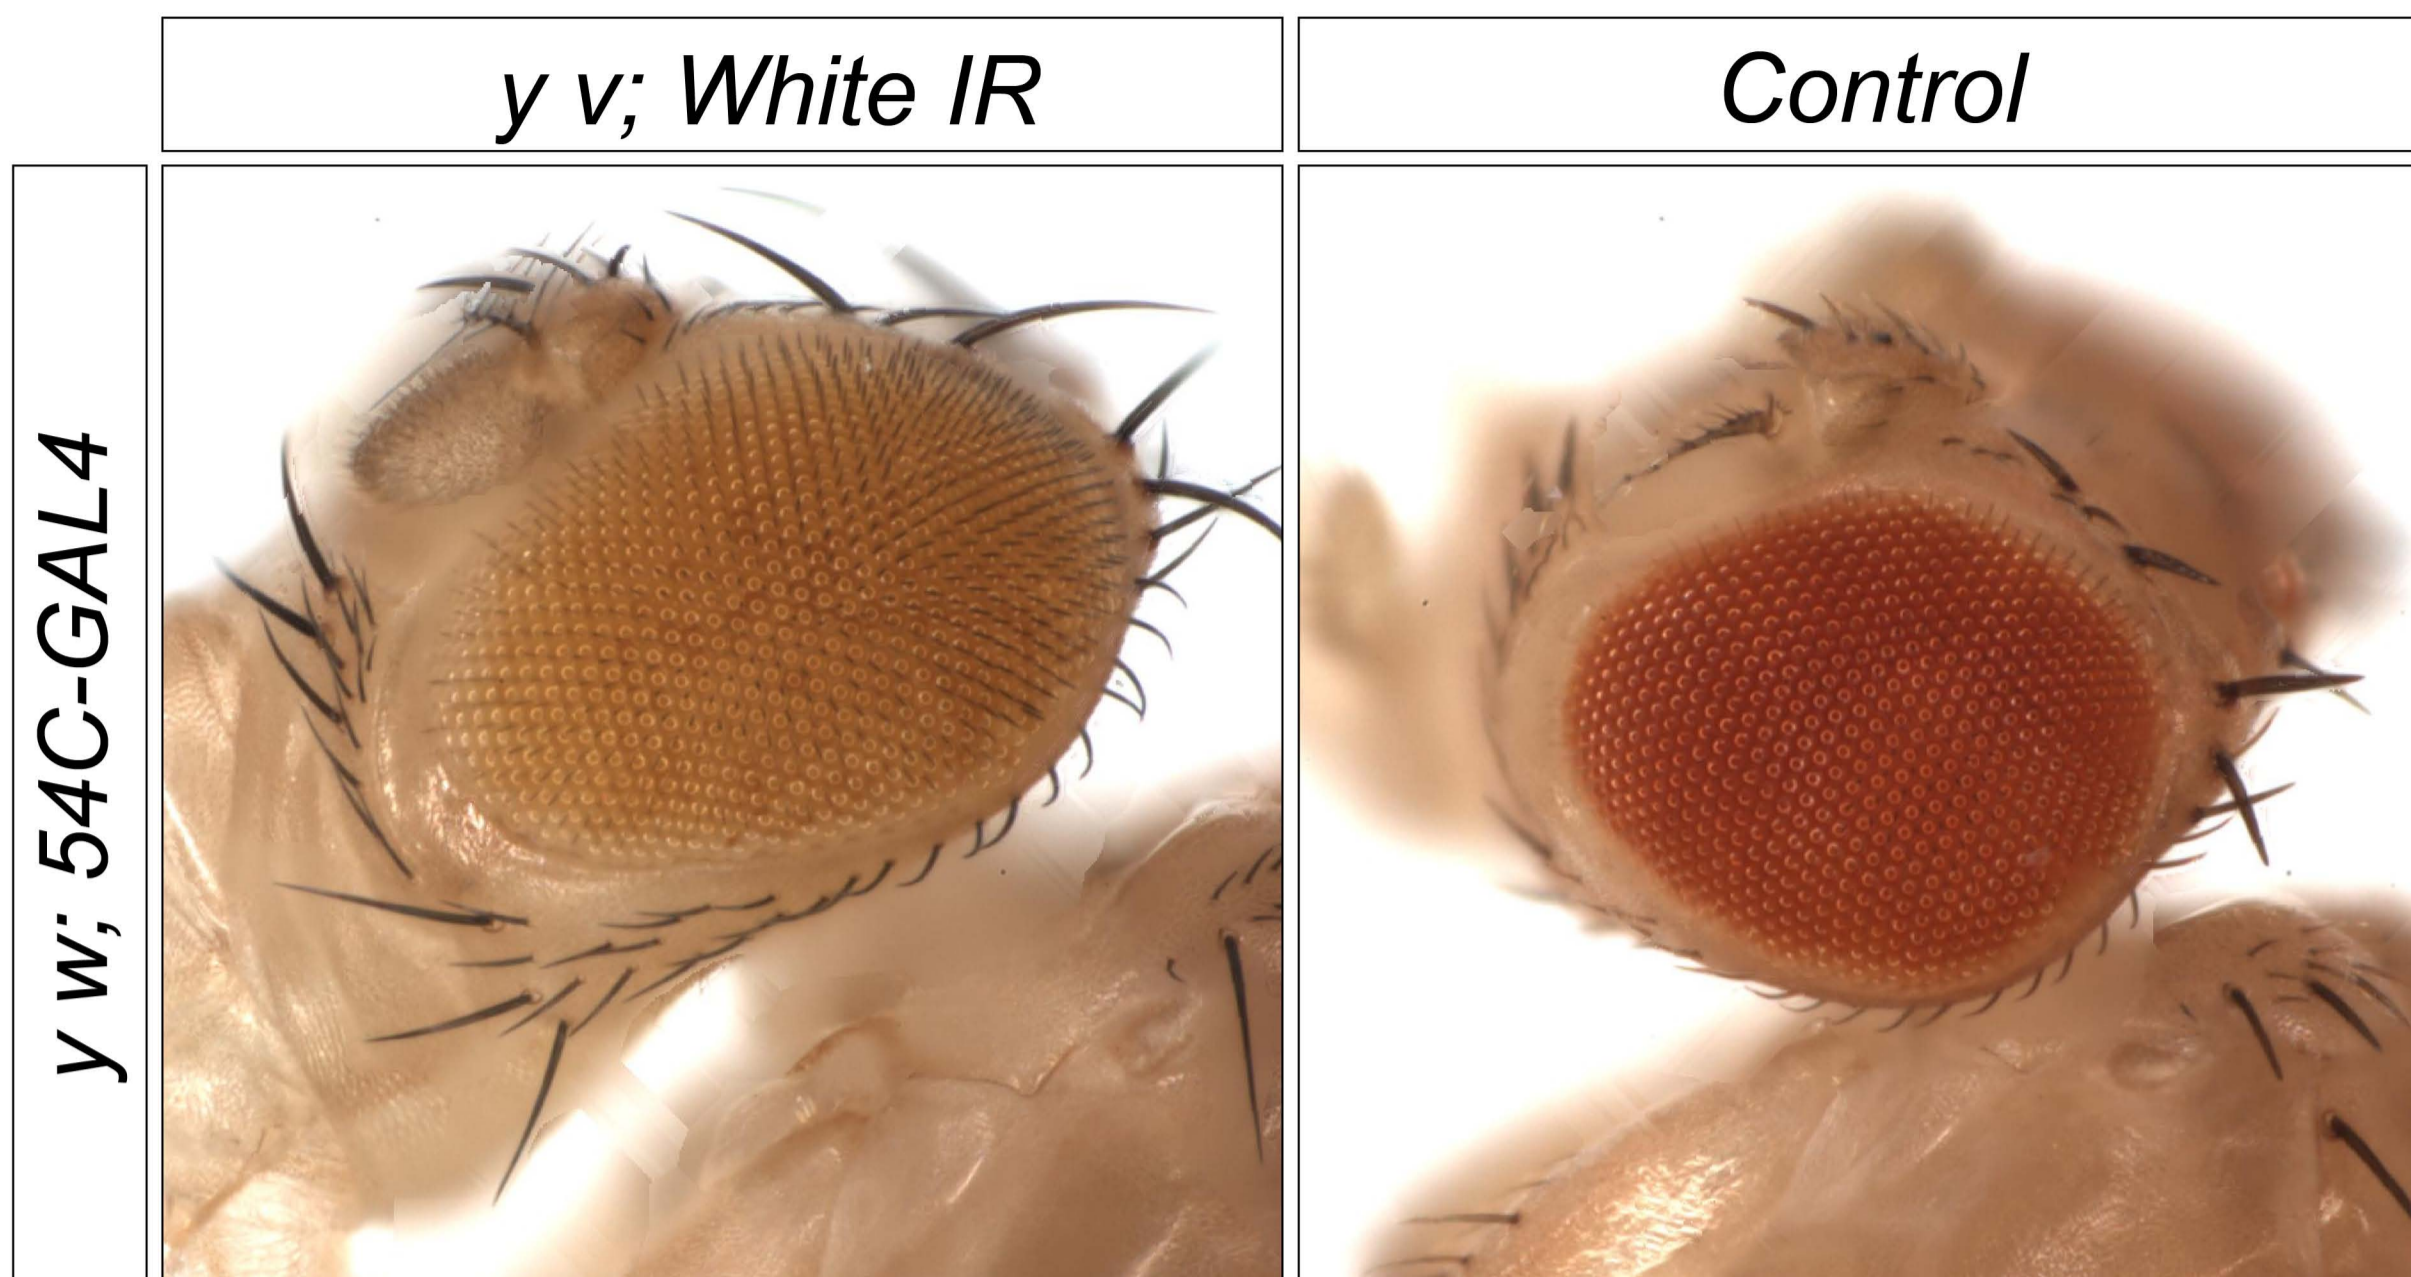

Phalloidin - 20 Days

**B**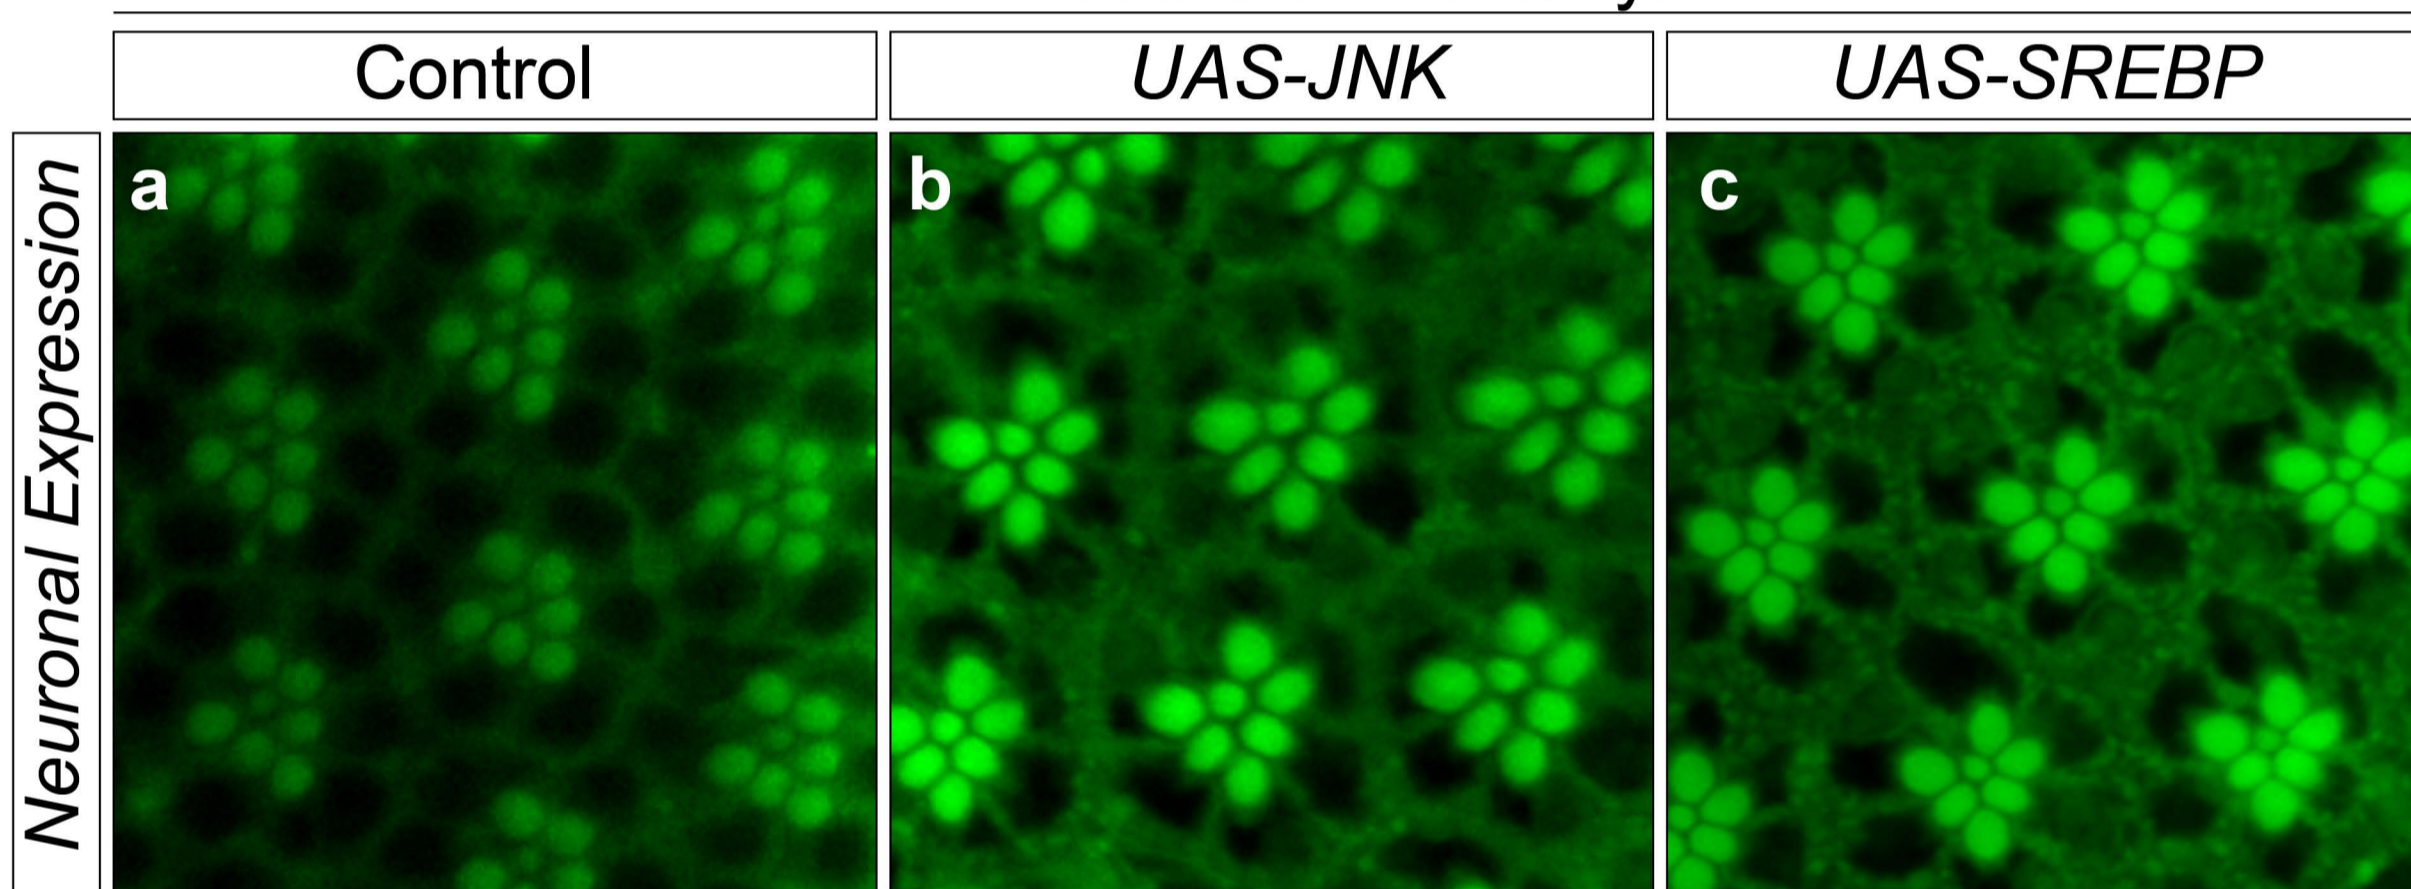**C**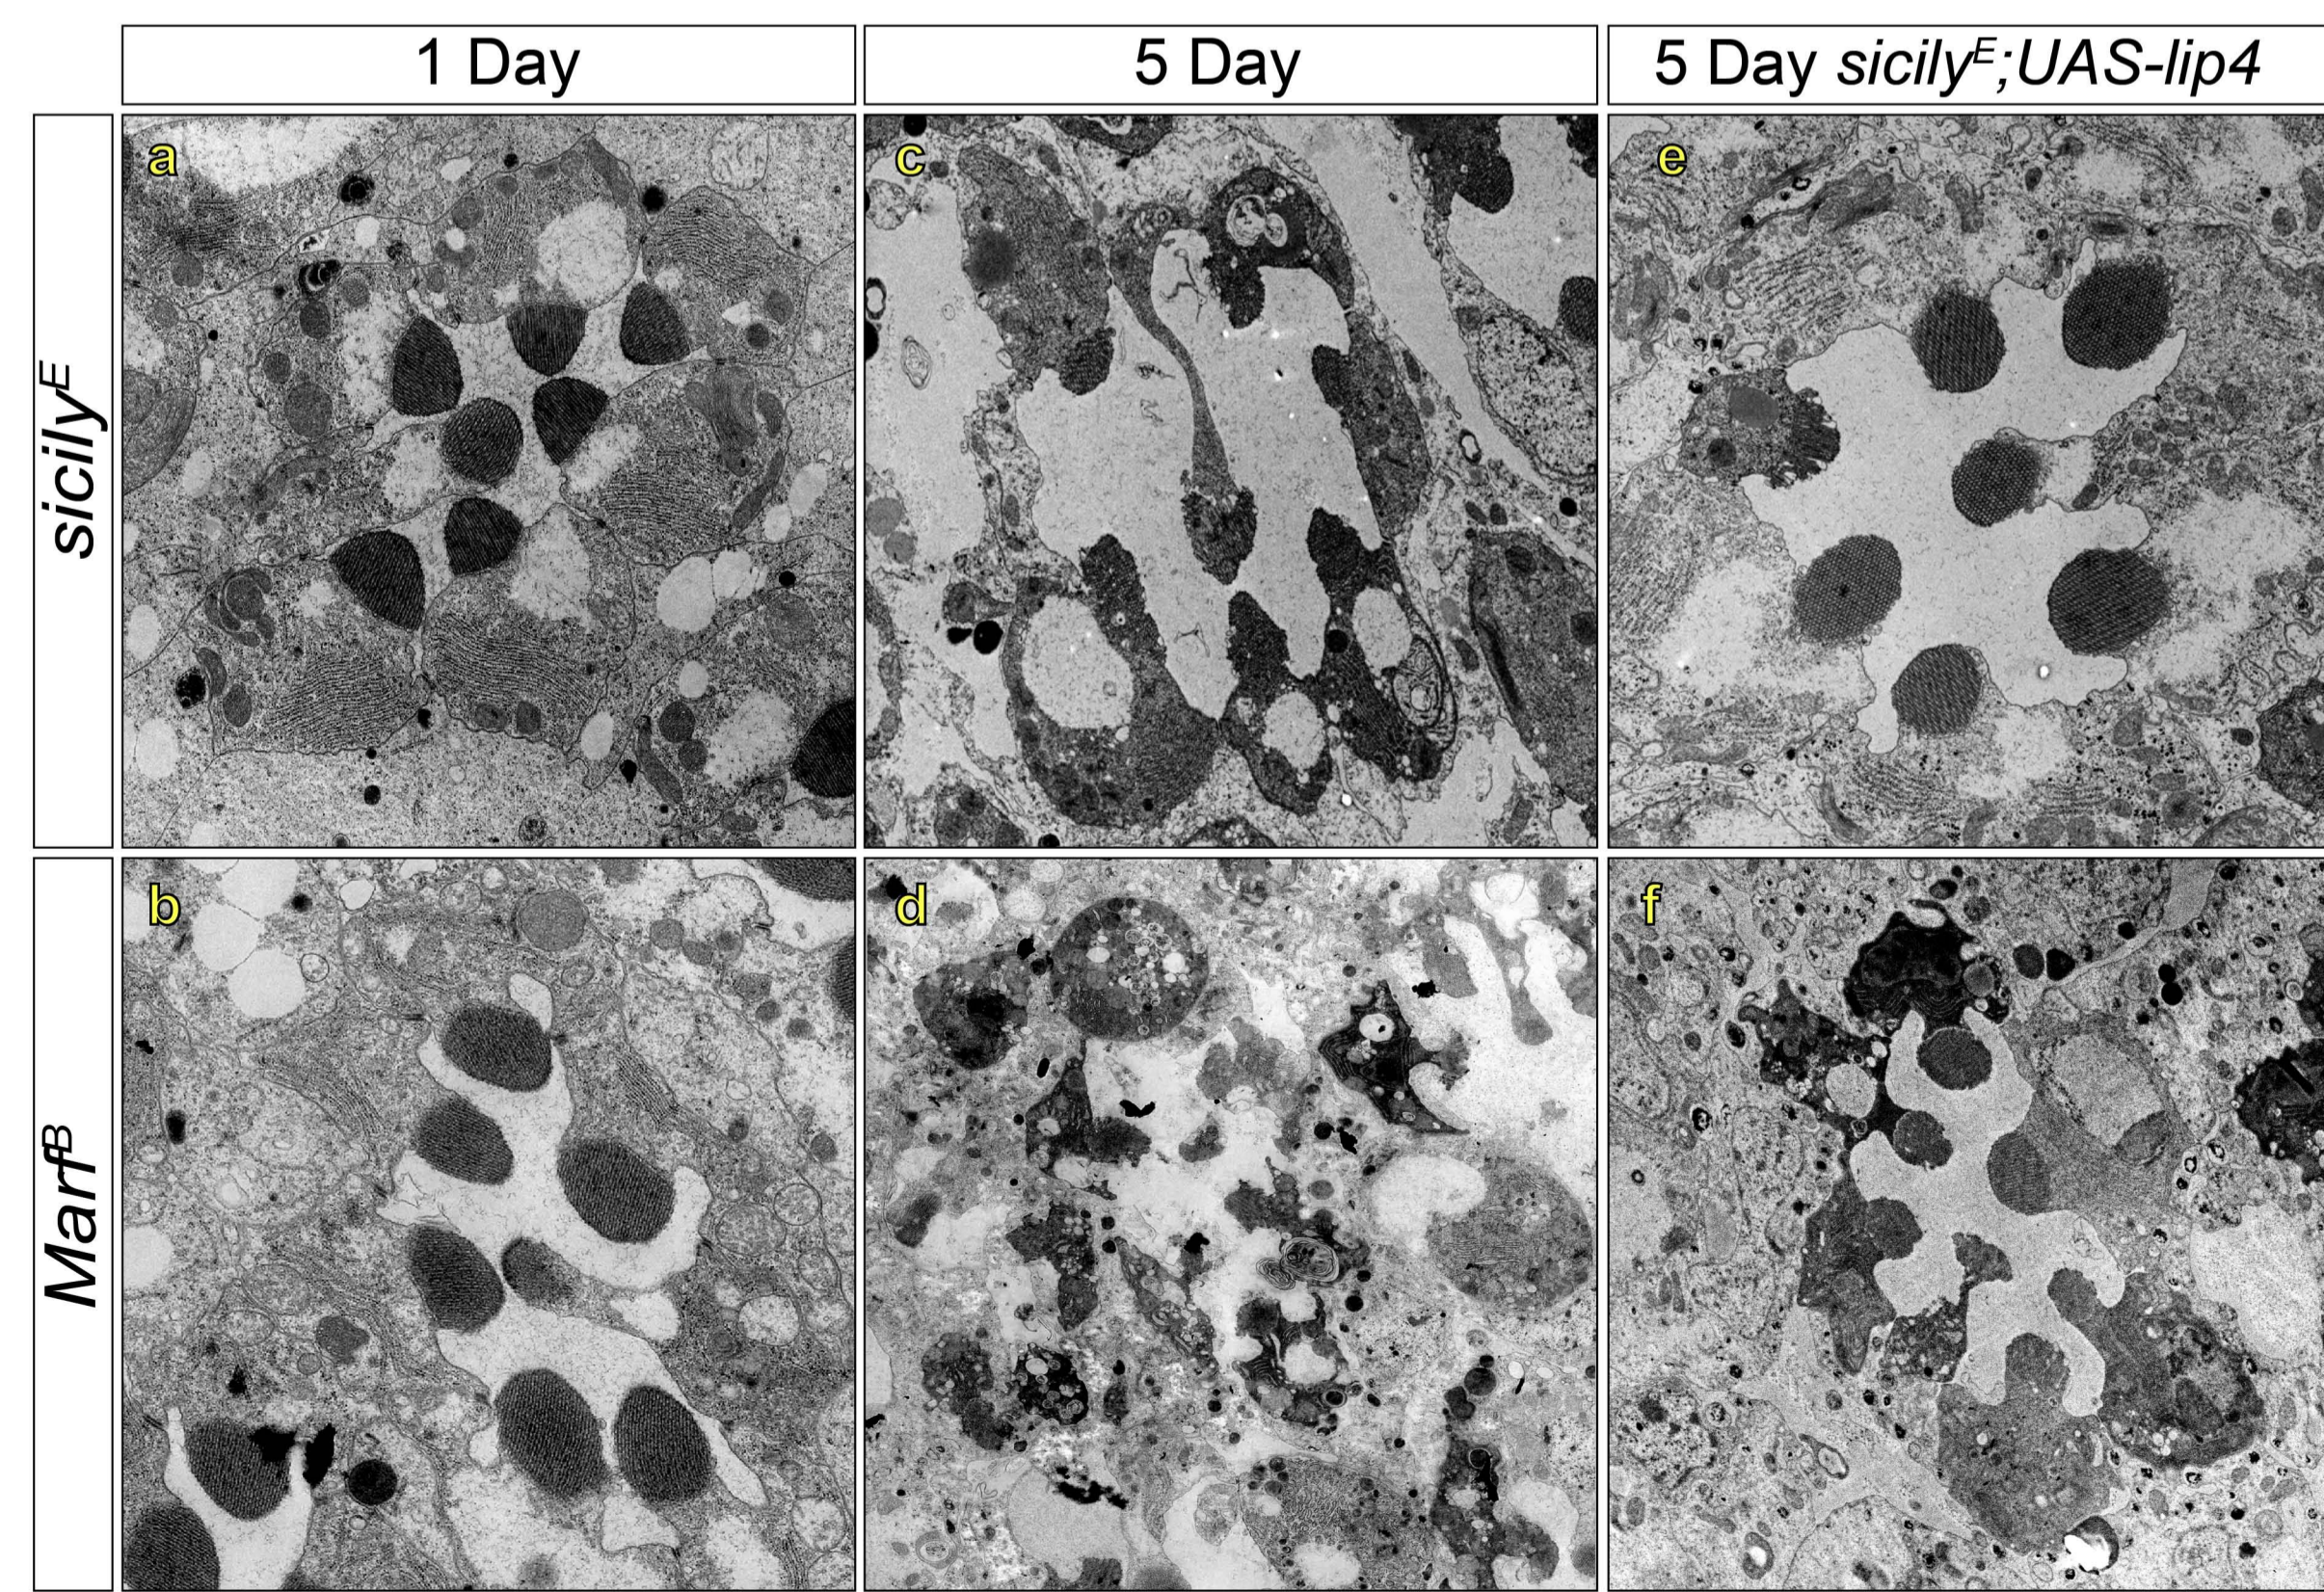

Supplement: NIHMS649341-supplement-5.pdf [file NIHMS649341-supplement-5.pdf]

Figure S6

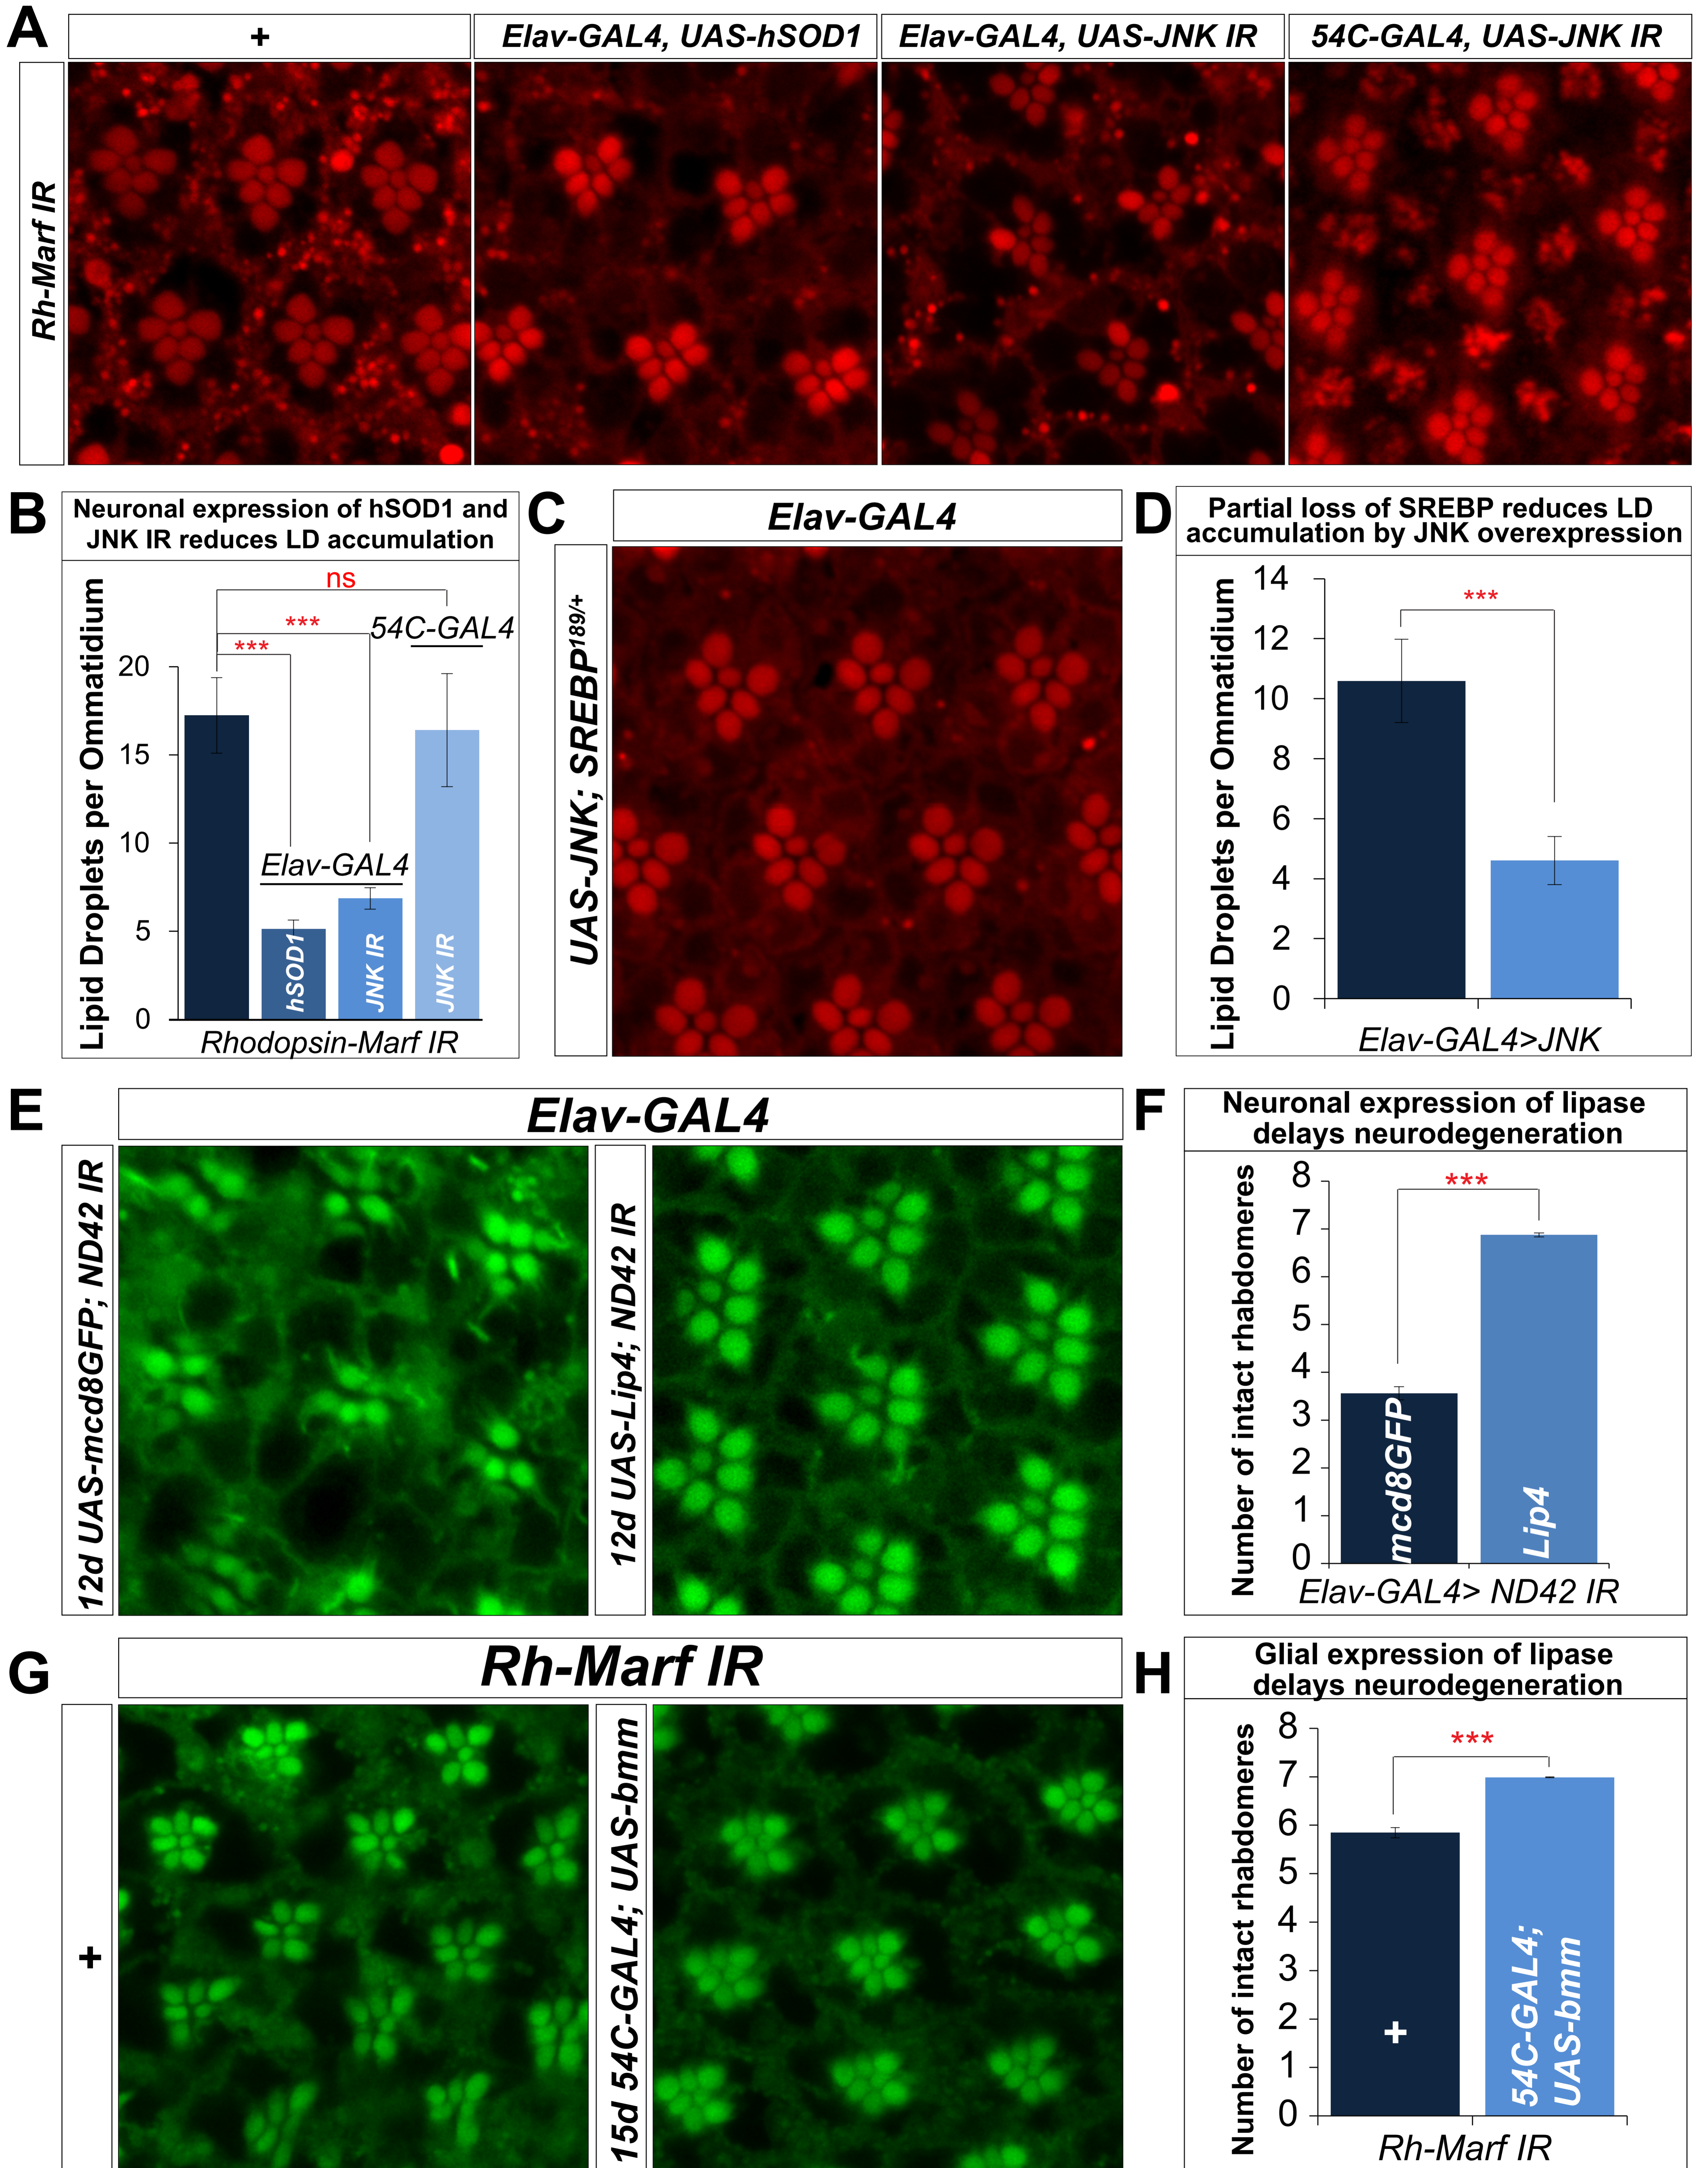

Supplement: NIHMS649341-supplement-6.pdf [file NIHMS649341-supplement-6.pdf]

Figure S7

Olfactory Bulb

A

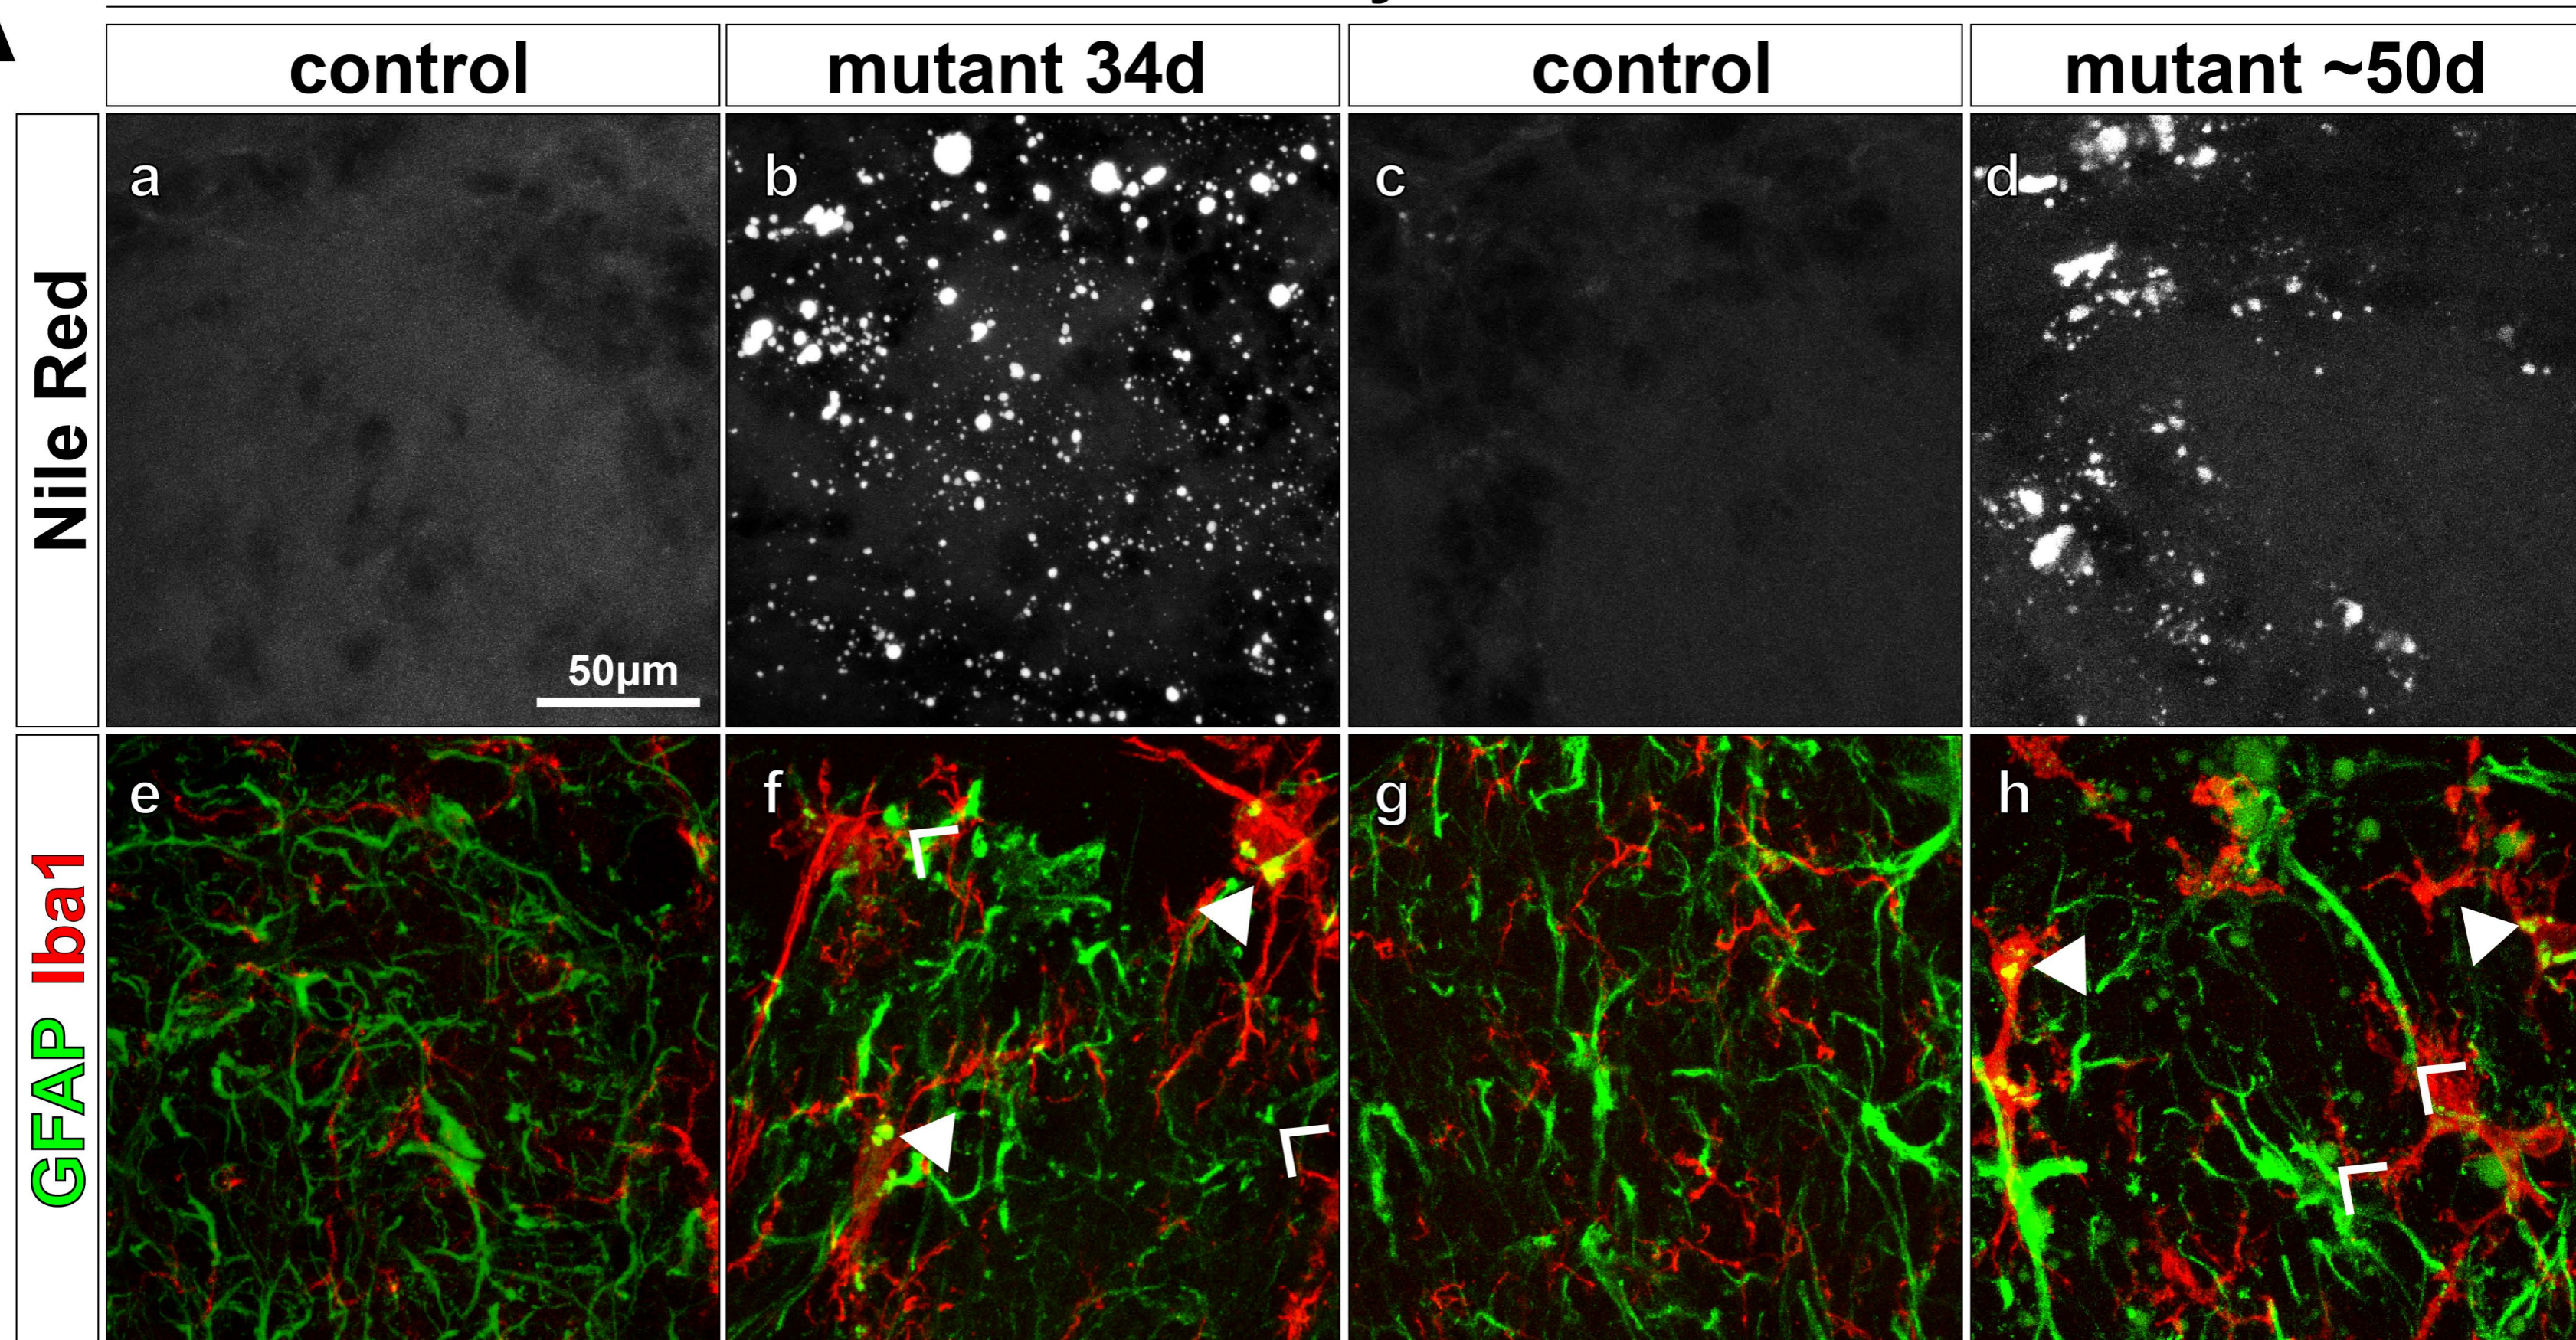

B

Vestibular Nucleus

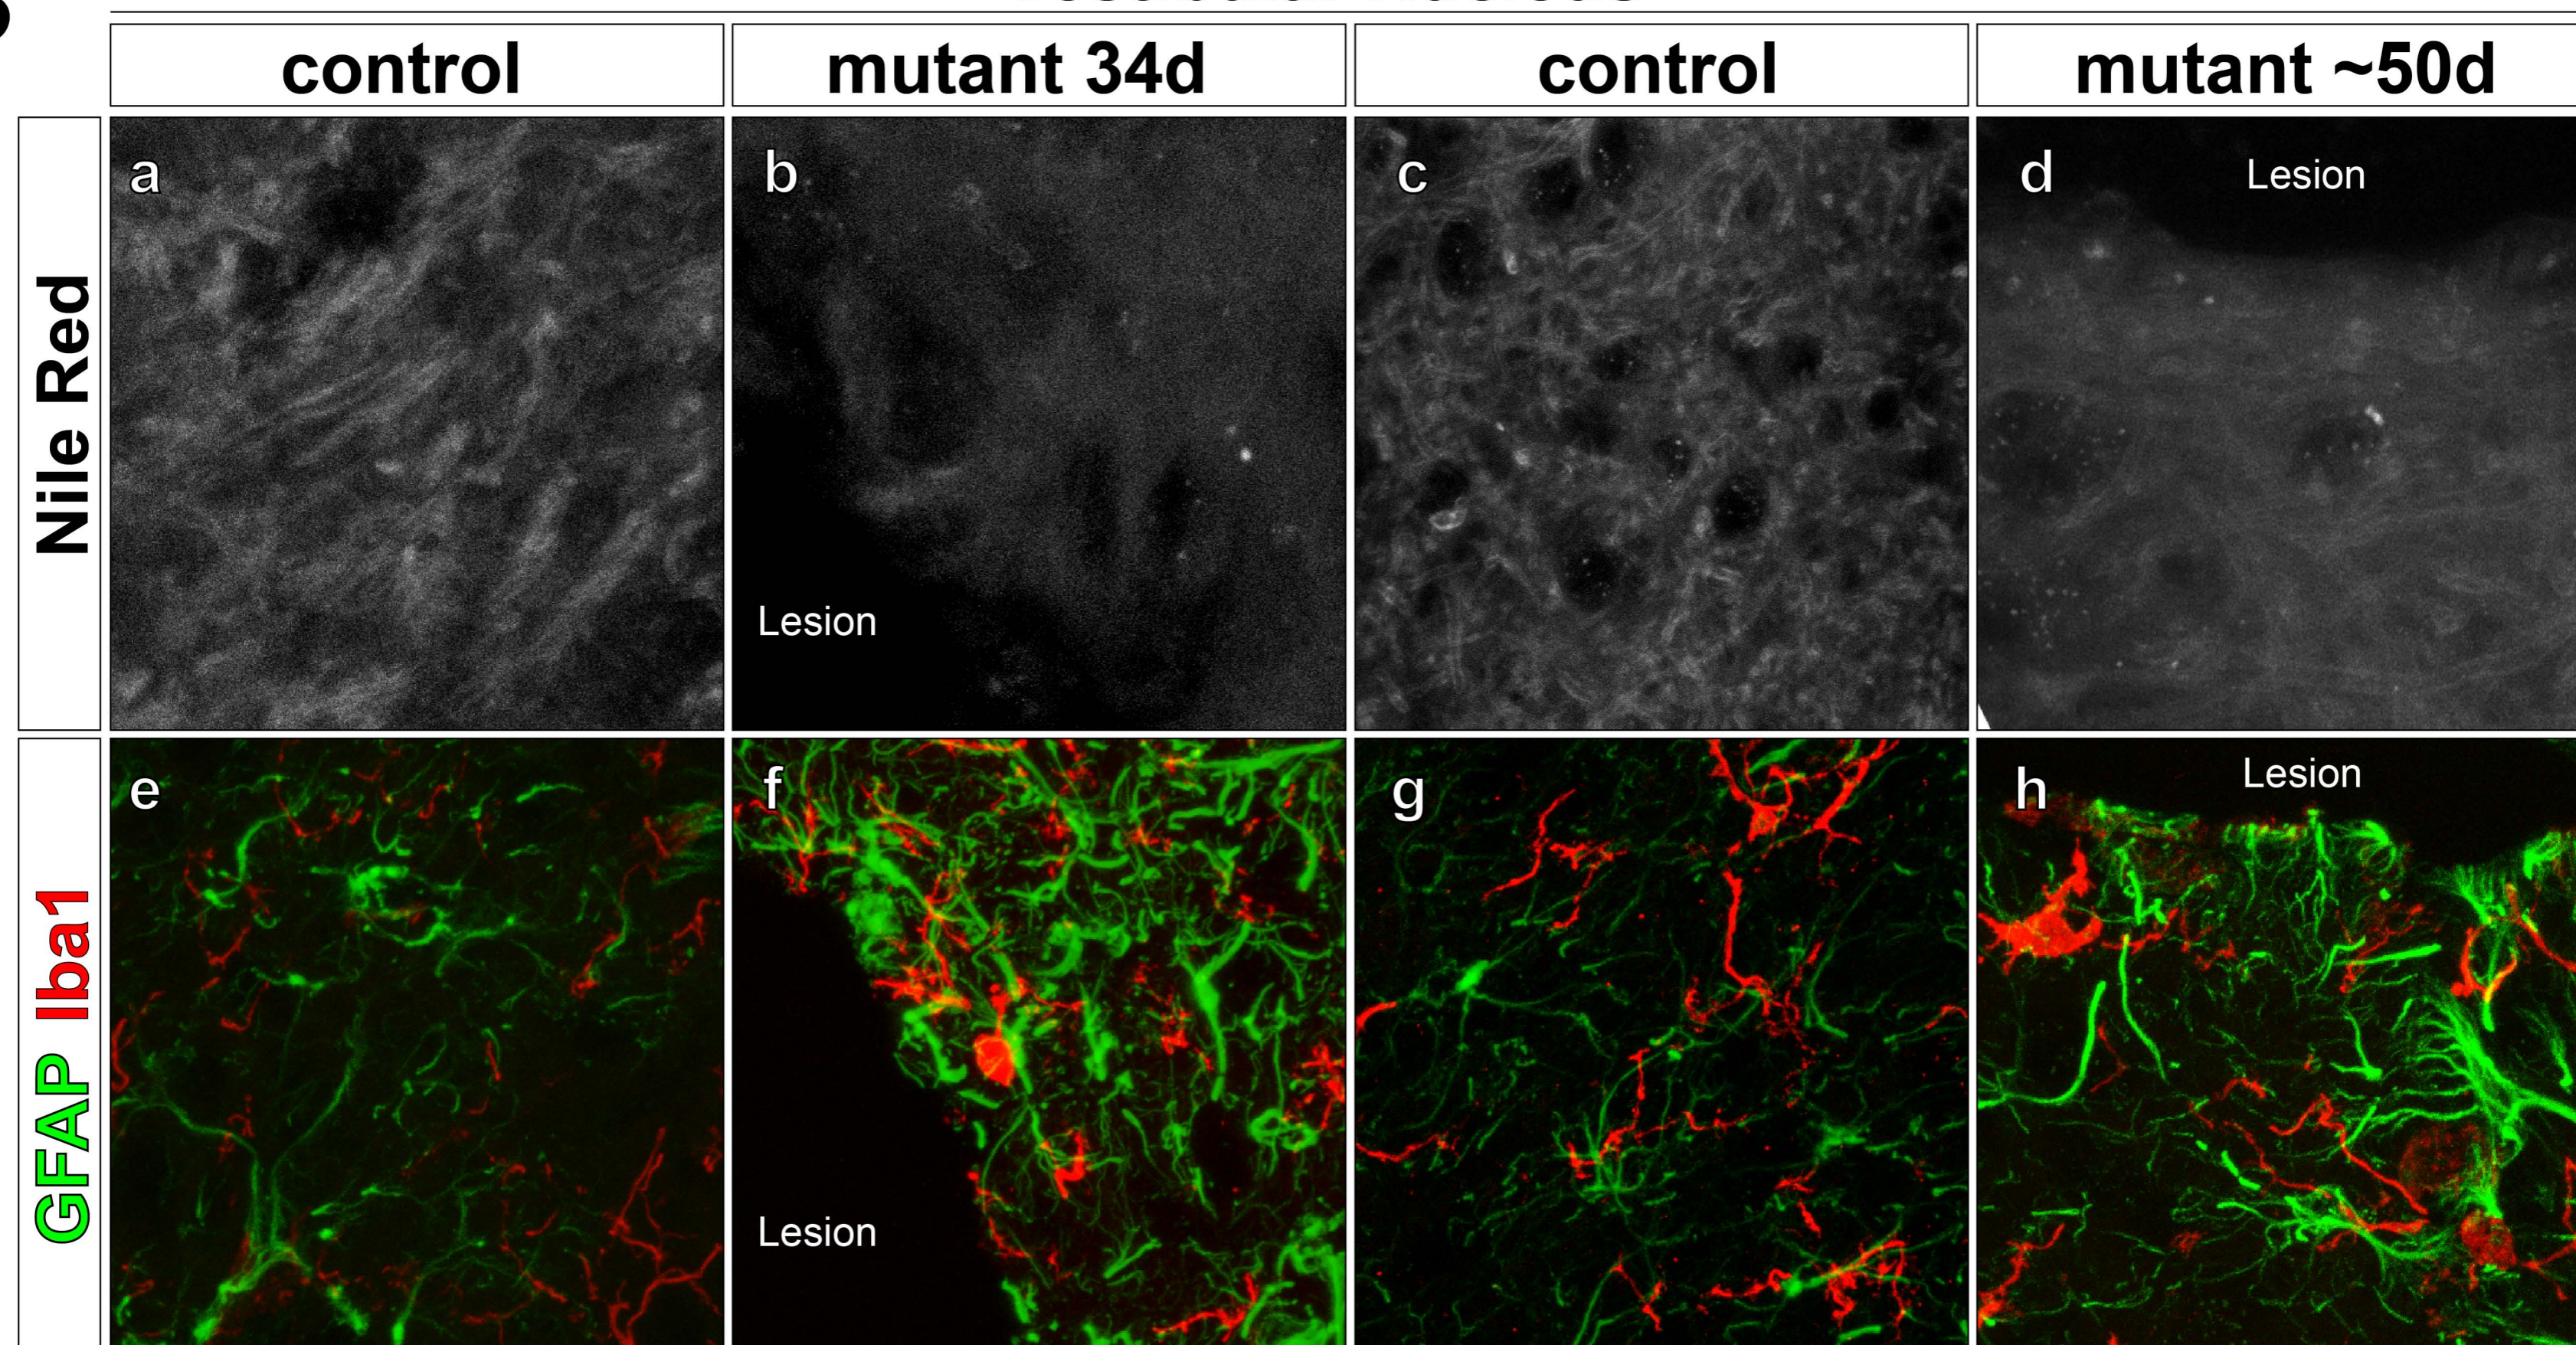

C

Vestibular Nucleus

Olfactory Bulb

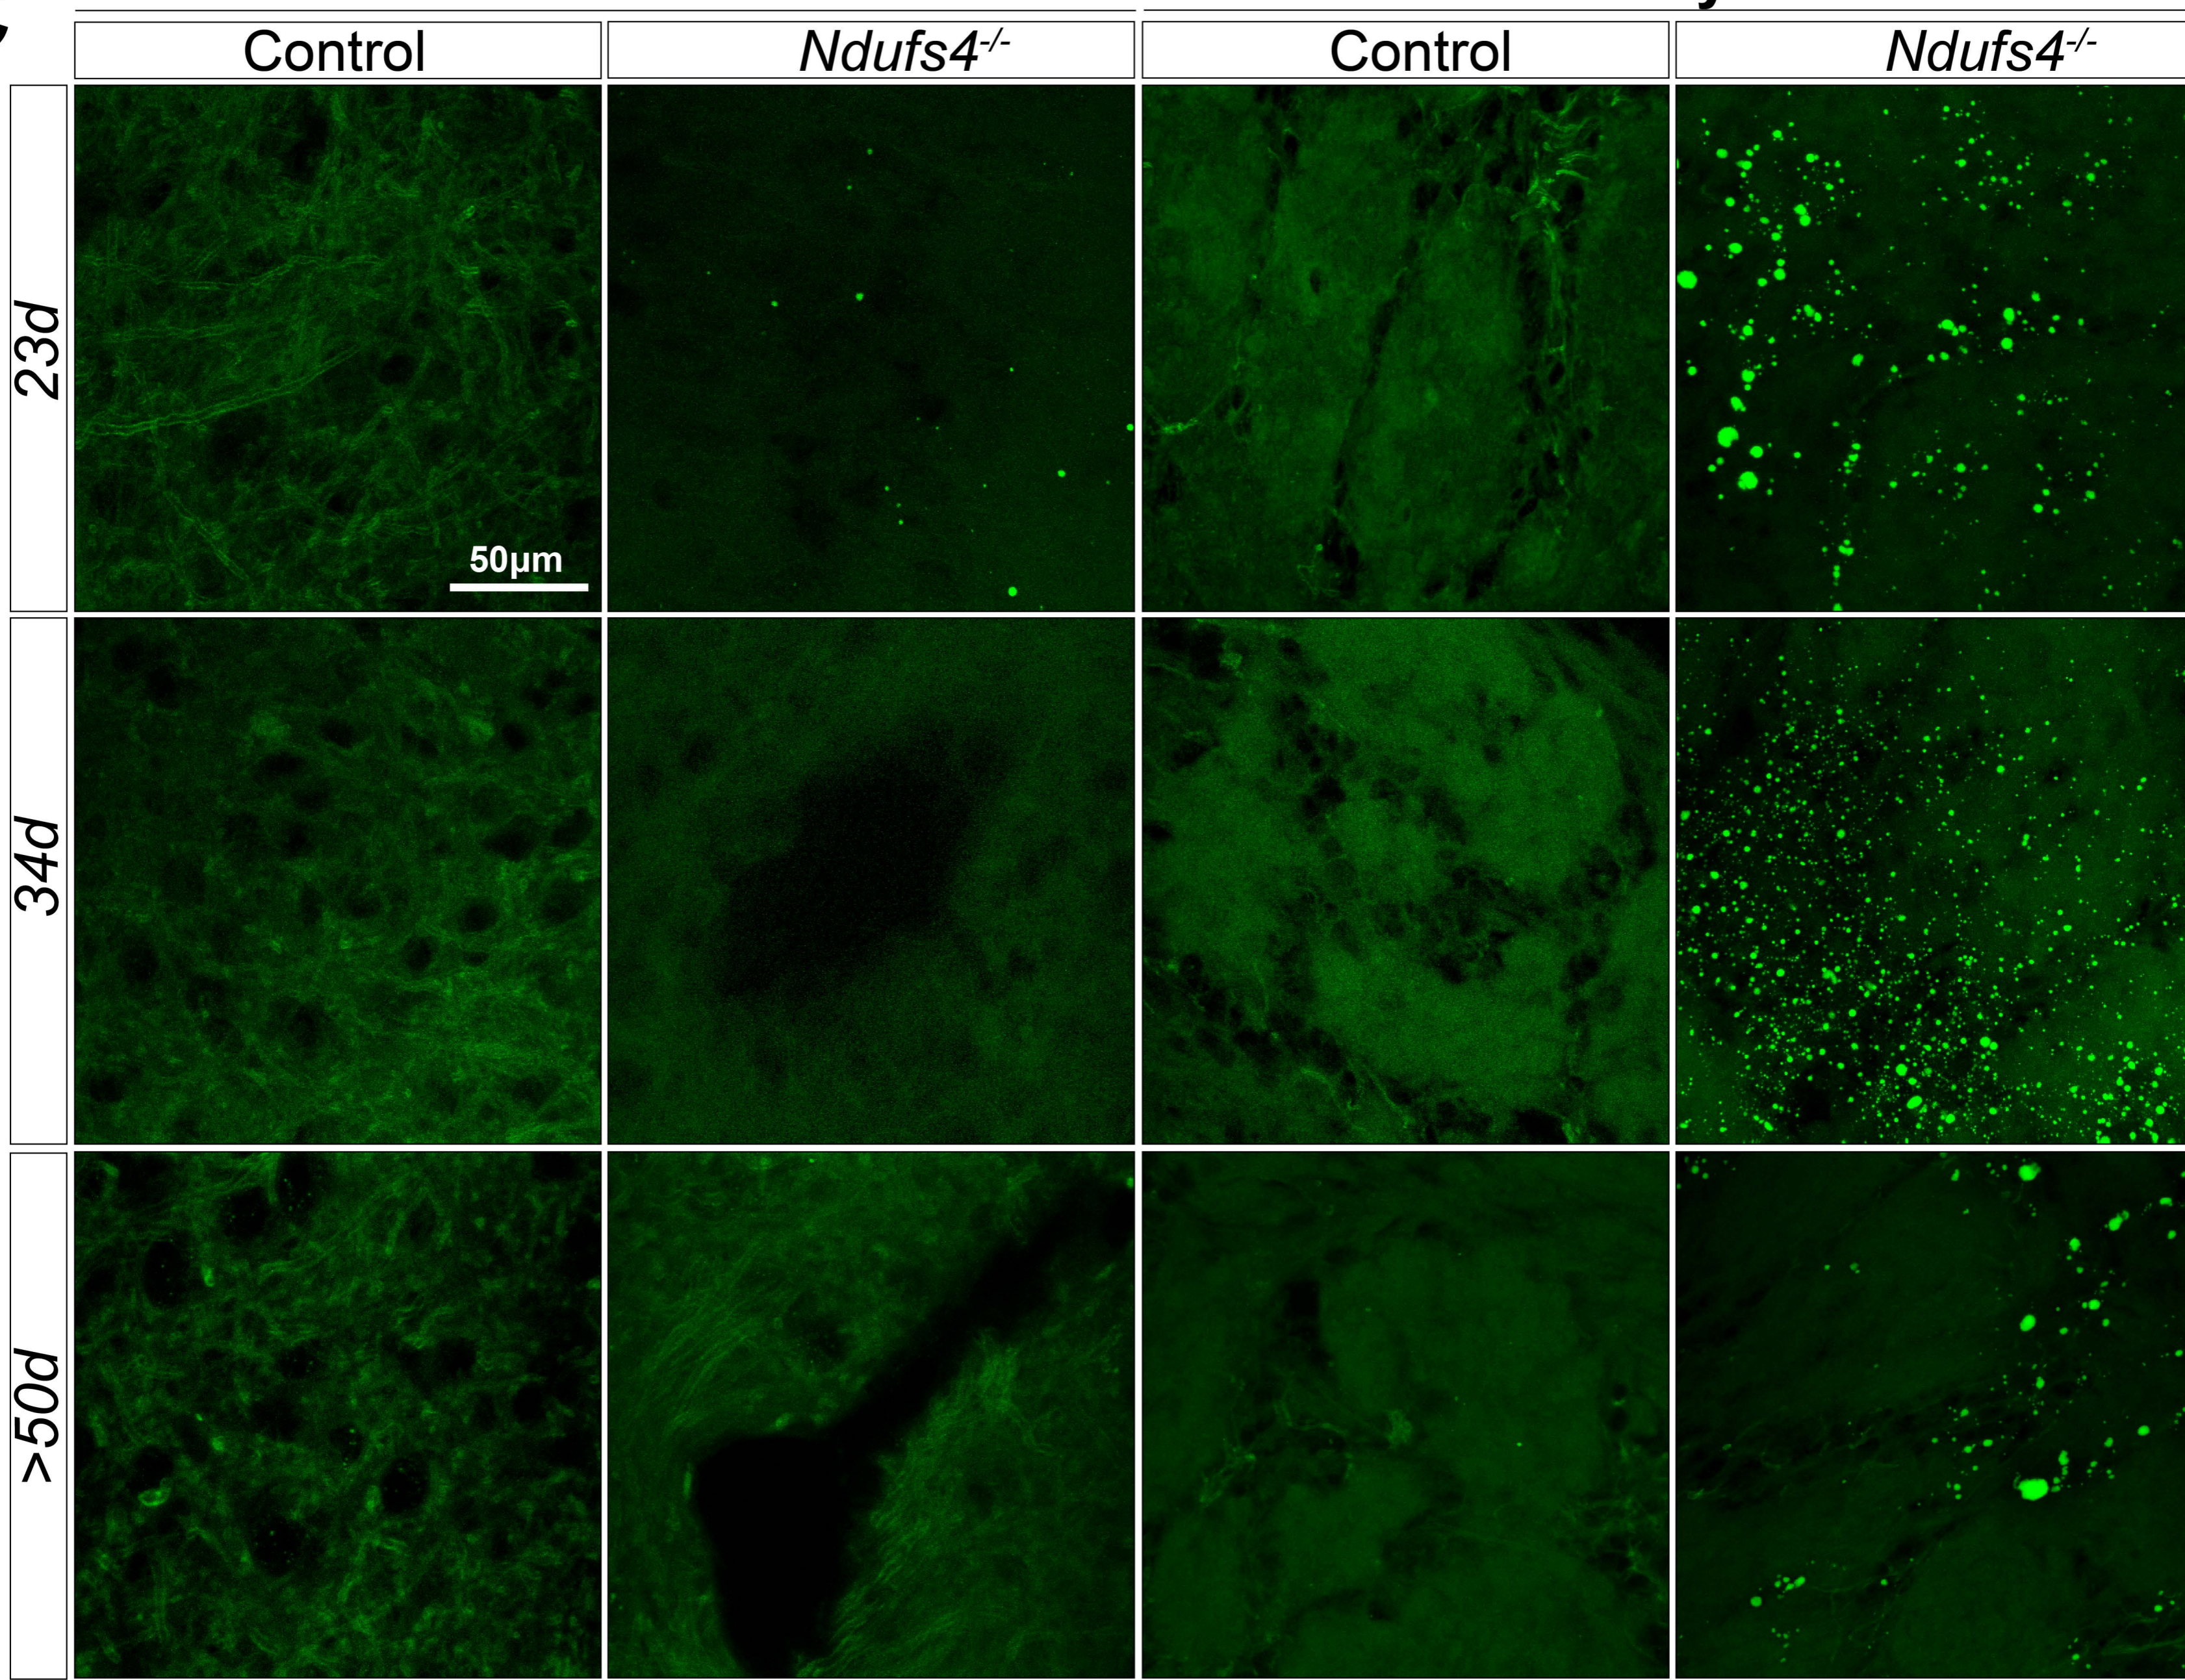

Supplement: NIHMS649341-supplement-7.pdf [file NIHMS649341-supplement-7.pdf]
